# Supplementary material for: Escherichia coli under Ionic Silver Stress: An Integrative Approach to Explore Transcriptional, Physiological and Biochemical Responses
Source: PLoS One. 2015 Dec 22;10(12):e0145748. doi: 10.1371/journal.pone.0145748 (PMC4699211; doi:10.1371/journal.pone.0145748)
Supplement: S1 Table — (XLSX) [file pone.0145748.s003.xlsx]

## Sheet: feuil1
Table S1: Fold changes (FC) in expression and p-values between different concentrations of AgNO3 and the associated cluster number for all the genes.
GeneNum	GeneSymbol	FC 5.0 vs 0 µM	p.value 5.0 vs 0 µM	FC 6.5 vs 0 µM	p.value 6.5 vs 0 µM	FC 8.5 vs 0 µM	p.value 8.5 vs 0 µM	Cluster
b0001	thrL	1.14827	0.734517	0.574563	0.193272	0.178854	0.00161847	5
b0002	thrA	1.34773	0.356997	0.813606	0.51933	0.0122869	9.41e-08	1
b0003	thrB	1.32676	0.403074	0.561469	0.105819	0.00485516	2.49e-08	3
b0004	thrC	1.11956	0.80165	0.173399	0.00273305	0.0029296	1.74e-07	3
b0005	yaaX	1.11656	0.765701	0.130941	0.000251359	0.0118575	3.53e-07	3
b0006	yaaA	0.793249	0.00703545	0.189328	6.03758e-10	0.0676263	6.37e-12	2
b0007	yaaJ	0.591658	0.130015	0.177734	0.000329496	0.0439129	2.58e-06	1
b0008	talB	0.966707	0.808259	0.209333	6.5172e-07	0.0216574	1.62e-10	1
b0009	mog	0.786099	0.0661513	0.137637	1.78294e-08	0.0542984	4.9e-10	1
b0010	yaaH	0.830828	0.233149	0.286824	8.65775e-06	0.120146	7.84e-08	2
b0011	yaaW	1.0561	0.341355	0.895643	0.0720899	0.71292	0.000122743	0
b0013	yaaI	1.11209	0.049288	0.641508	3.91022e-06	0.623359	2.26e-06	0
b0014	dnaK	1.32742	0.0932627	1.21143	0.236716	2.21732	0.000440766	6
b0015	dnaJ	1.40272	0.350996	2.54628	0.022886	10.799	5.33e-05	6
b0016	insL	1.13744	0.745402	1.73232	0.185681	14.059	5.55e-05	6
b0018	mokC	0.936497	0.911289	2.52342	0.139062	20.2073	0.000440834	6
b0019	nhaA	1.44328	0.0414173	8.15596	1.58826e-07	4.23724	4.45e-06	6
b0020	nhaR	0.896521	0.458169	2.69581	4.61565e-05	1.64114	0.00608587	6
b0021	insB	0.770609	0.269238	0.300008	0.000344962	0.166626	1.46e-05	5
b0022	insA	1.00511	0.982394	0.31974	0.000561629	0.151592	1.05e-05	5
b0023	rpsT	0.839248	0.104953	0.14425	4.55833e-09	0.0149846	3.06e-12	1
b0024	yaaY	0.900345	0.803053	1.17958	0.695499	0.667355	0.347558	0
b0025	ribF	0.981375	0.890126	0.342382	1.42594e-05	0.0500314	1.31e-09	2
b0026	ileS	1.02388	0.694544	0.278222	1.73688e-09	0.104471	8.11e-12	2
b0027	lspA	0.996835	0.974111	0.335732	6.79774e-07	0.109222	1e-09	2
b0028	fkpB	0.969427	0.735693	0.202592	1.17806e-08	0.044856	2.27e-11	1
b0029	ispH	0.926509	0.390086	0.188544	4.80458e-09	0.0241714	2.47e-12	1
b0030	rihC	1.69972	3.34351e-07	0.302799	1.78192e-10	0.256176	5.17e-11	5
b0031	dapB	0.843117	0.28886	0.0287456	9.65533e-10	0.0147348	1.9e-10	1
b0032	carA	1.27127	0.360521	0.027077	8.41659e-08	0.00225755	6.45e-10	3
b0033	carB	1.02323	0.858421	0.0675267	2.09654e-09	0.0025856	1.16e-12	3
b0034	caiF	0.813953	0.421314	0.116237	7.0646e-06	0.0586882	6.26e-07	1
b0035	caiE	0.788845	0.291894	0.502954	0.00953456	0.308252	0.000294919	5
b0036	caiD	0.920004	0.479567	1.00201	0.986243	0.801093	0.0802022	0
b0037	caiC	0.860929	0.0312698	0.240538	7.47259e-10	0.165319	8.26e-11	5
b0038	caiB	0.946764	0.692641	0.180928	2.64839e-07	0.0554924	2.07e-09	1
b0039	caiA	0.784305	0.00285848	0.251563	1.31538e-09	0.197558	2.88e-10	5
b0040	caiT	0.888171	0.08324	0.895384	0.10309	0.636372	3.09e-05	0
b0041	fixA	1.01775	0.868648	0.854409	0.161146	0.65489	0.00241585	0
b0042	fixB	0.842903	0.0295802	0.774593	0.0036771	0.697173	0.000357187	0
b0043	fixC	1.0221	0.850563	0.6902	0.00876245	0.429761	2.74e-05	5
b0044	fixX	0.916355	0.0831614	0.616468	1.24567e-06	0.557125	2.26e-07	0
b0045	yaaU	1.00473	0.92248	0.824757	0.00244736	0.735959	8.66e-05	0
b0046	kefF	0.873893	0.310291	0.594701	0.00225522	0.332957	7.37e-06	5
b0047	kefC	0.955776	0.797292	0.191101	3.09236e-06	0.0901282	1.08e-07	2
b0048	folA	0.753949	0.0643441	0.351729	2.07233e-05	0.0724994	5.42e-09	2
b0049	apaH	0.91439	0.640296	0.183632	5.03044e-06	0.0124869	8.66e-10	1
b0050	apaG	0.993486	0.978762	0.242847	0.000177793	0.00663406	2.65e-09	3
b0051	rsmA	1.12913	0.502337	0.268566	2.54593e-05	0.00261194	2.69e-11	3
b0052	pdxA	0.91408	0.788847	0.173634	0.000370268	0.00347692	1.54e-08	3
b0053	surA	0.906253	0.734879	0.214664	0.000330723	0.00385964	4.79e-09	3
b0054	lptD	1.01148	0.968459	0.224711	0.000400747	0.00391942	4.73e-09	3
b0055	djlA	0.928502	0.719543	0.116335	1.23447e-06	0.0167651	3.46e-09	1
b0058	rluA	0.912598	0.314805	0.270225	5.33025e-08	0.194159	6.62e-09	5
b0059	rapA	0.857776	0.0672355	0.217946	3.27968e-09	0.160348	5.87e-10	2
b0060	polB	0.857992	0.48104	0.407352	0.00174114	0.048541	8.2e-08	2
b0061	araD	0.85822	0.578521	0.833577	0.509821	0.637939	0.123209	0
b0062	araA	0.900482	0.419244	0.427582	5.67673e-05	0.254609	9.74e-07	5
b0063	araB	0.891073	0.219066	0.745249	0.0078055	0.530913	3.66e-05	0
b0064	araC	1.05163	0.630078	0.727194	0.0109566	0.164213	1.19e-08	5
b0065	yabI	1.00199	0.989799	0.724352	0.0607091	0.117517	1.04e-07	2
b0066	thiQ	1.18496	0.366586	0.970857	0.872245	0.1786	3.22e-06	5
b0067	thiP	1.30541	0.0742573	0.238814	1.19241e-06	0.0895198	1.02e-08	2
b0068	thiB	1.24953	0.0329629	0.412497	2.49668e-06	0.0342554	1.04e-11	1
b0069	sgrR	1.44722	0.0462693	0.655455	0.0267267	0.342675	7.29e-05	5
b0070	setA	0.868367	0.239422	0.394392	1.18022e-05	0.0321962	7.7e-11	1
b0071	leuD	1.10406	0.72957	0.254361	0.000691234	0.0583221	1.89e-06	2
b0072	leuC	1.25304	0.610941	0.31448	0.0233177	0.0190081	4.57e-06	1
b0073	leuB	1.32352	0.406808	0.405586	0.0198189	0.00878914	7.35e-08	3
b0074	leuA	1.25492	0.377459	0.3008	0.000717895	0.00222541	5.3e-10	3
b0075	leuL	0.968258	0.638468	0.156311	1.80258e-10	0.0626739	4.07e-12	2
b0076	leuO	0.915741	0.559266	0.592437	0.00524104	0.482333	0.000609173	5
b0077	ilvI	1.13395	0.777167	0.0575519	7.45961e-05	0.00158066	6.17e-08	3
b0078	ilvH	1.16084	0.640777	0.0433308	2.02741e-06	0.00407796	1.24e-08	3
b0080	fruR	0.958202	0.844927	0.093293	8.63852e-07	0.00846093	1.39e-09	3
b0081	mraZ	0.926392	0.717707	0.165116	7.14329e-06	0.00767661	8.36e-10	3
b0082	rsmH	1.0132	0.954567	0.195123	3.39232e-05	0.0127156	5.31e-09	1
b0083	ftsL	1.21932	0.382233	0.327819	0.000499632	0.0154759	5.89e-09	1
b0084	ftsI	0.844199	0.613126	0.234995	0.00134688	0.0367658	1.94e-06	1
b0085	murE	0.910796	0.805715	0.133709	0.000332915	0.00887703	2.55e-07	3
b0086	murF	0.961876	0.874091	0.154452	1.88903e-05	0.0132556	1.04e-08	1
b0087	mraY	0.95461	0.898875	0.13884	0.000290265	0.0101472	2.36e-07	3
b0088	murD	0.820689	0.560941	0.11939	8.77435e-05	0.0127983	1.8e-07	1
b0089	ftsW	0.88138	0.699391	0.220142	0.000862245	0.00628873	3.32e-08	3
b0090	murG	0.902077	0.616073	0.263287	6.6277e-05	0.0134062	1.94e-09	1
b0091	murC	0.802461	0.34341	0.15963	1.13242e-05	0.0100997	2.84e-09	3
b0092	ddlB	1.01204	0.965155	0.22611	0.000281345	0.0217068	8.92e-08	1
b0093	ftsQ	0.933625	0.406371	0.305316	5.92845e-08	0.036726	3.95e-12	1
b0094	ftsA	0.927202	0.379285	0.376175	4.79019e-07	0.057138	2.18e-11	2
b0095	ftsZ	1.11088	0.231377	0.419284	1.41022e-06	0.195523	4.45e-09	5
b0096	lpxC	0.69924	0.266052	0.850788	0.605818	0.770931	0.411353	0
b0097	secM	0.89042	0.706746	0.287499	0.00214341	0.00993315	4.65e-08	1
b0098	secA	0.890642	0.507446	0.147636	7.31819e-07	0.00468746	5.13e-11	3
b0099	mutT	0.879063	0.448075	0.118321	2.04922e-07	0.0334688	2.8e-09	1
b0101	yacG	0.788818	0.0305634	0.149328	3.54428e-09	0.0299001	1.1e-11	1
b0102	yacF	0.873352	0.330445	0.141639	6.72504e-08	0.0225506	1.38e-10	1
b0103	coaE	0.860841	0.333361	0.22649	2.10373e-06	0.0371266	1.43e-09	1
b0104	guaC	0.889775	0.554152	0.173918	4.82337e-06	0.0510502	4.1e-08	1
b0106	hofC	0.920877	0.244226	0.388684	9.65278e-08	0.2791	6.01e-09	5
b0107	hofB	0.819377	0.0248093	0.534133	1.06272e-05	0.264373	1.25e-08	5
b0108	ppdD	0.797246	0.424906	0.454897	0.0166538	0.178633	0.000104628	5
b0109	nadC	0.905375	0.642923	0.107579	1.22416e-06	0.0137798	3.09e-09	1
b0110	ampD	0.802747	0.341714	0.1124	2.38791e-06	0.0184902	1.01e-08	1
b0111	ampE	0.895961	0.538561	0.181628	2.49453e-06	0.0395426	7.52e-09	1
b0112	aroP	1.29695	0.208252	0.108339	6.44843e-07	0.00989912	7.61e-10	3
b0113	pdhR	1.02053	0.927449	0.199471	2.94159e-05	0.0127952	4.03e-09	1
b0114	aceE	1.1541	0.602281	0.592086	0.0784273	0.0152877	3.86e-08	1
b0115	aceF	0.914895	0.666526	0.446357	0.00263107	0.0244801	8.36e-09	1
b0116	lpd	1.23676	0.241509	0.513968	0.00317815	0.00545768	7.52e-11	3
b0117	yacH	0.743497	0.00220939	0.633081	9.76129e-05	0.312023	2.79e-08	5
b0118	acnB	1.18825	0.2596	0.23122	1.96657e-06	0.141459	1.47e-07	2
b0119	yacL	0.746125	0.21343	0.274747	0.00018657	0.0602384	2.55e-07	2
b0120	speD	0.955424	0.864081	0.101713	6.86296e-06	0.00470352	3.04e-09	3
b0121	speE	1.13354	0.62425	0.131525	1.28245e-05	0.00289536	8.77e-10	3
b0122	yacC	0.876087	0.465797	0.151698	1.13394e-06	0.0230521	1.97e-09	1
b0123	cueO	0.364244	0.00031685	8.65112	5.63113e-07	0.797646	0.249128	6
b0124	gcd	0.835247	0.607111	0.181858	0.000590317	0.0410995	3.84e-06	1
b0125	hpt	1.00856	0.956041	0.240429	3.728e-06	0.0212671	4.15e-10	1
b0126	can	1.15105	0.417331	0.15219	7.49313e-07	0.0139511	3.87e-10	1
b0127	yadG	0.982649	0.910634	0.203297	1.50459e-06	0.00844728	5.88e-11	3
b0128	yadH	1.14939	0.417347	0.227973	5.72292e-06	0.0659496	2.4e-08	2
b0129	yadI	0.970703	0.891964	0.139002	4.49815e-06	0.0282553	2.17e-08	1
b0130	yadE	0.768653	0.137004	0.161081	7.97458e-07	0.0390499	4.11e-09	1
b0131	panD	0.810267	0.0482904	0.312088	3.07051e-07	0.104109	6.56e-10	2
b0132	yadD	0.87486	0.152719	0.646335	0.000558708	0.433951	2.99e-06	5
b0133	panC	0.801368	0.341553	0.131909	4.94258e-06	0.0228145	1.79e-08	1
b0134	panB	0.779826	0.050804	0.111936	4.83911e-09	0.0149675	1.04e-11	1
b0135	yadC	1.24833	0.200438	0.932245	0.6732	0.378421	0.000154786	5
b0136	yadK	0.952411	0.653606	1.00731	0.946261	0.816963	0.0851421	0
b0137	yadL	1.05483	0.666355	0.86466	0.254705	0.685831	0.0110611	0
b0138	yadM	0.865953	0.11642	0.711822	0.0024499	0.56649	5.84e-05	0
b0139	htrE	1.23461	0.0743705	1.30587	0.0305516	1.01271	0.90692	0
b0140	ecpD	0.944742	0.665263	1.14989	0.299635	0.881791	0.347569	0
b0141	yadN	0.969933	0.695714	0.830642	0.0353024	0.83006	0.0347582	0
b0142	folK	0.900285	0.574916	0.344488	0.000184143	0.191305	5.01e-06	5
b0143	pcnB	0.822661	0.451328	0.086758	2.65434e-06	0.00523975	2.48e-09	3
b0144	yadB	0.970039	0.878474	0.237901	2.94955e-05	0.0346925	1.55e-08	1
b0145	dksA	0.807136	0.497151	1.14441	0.666682	0.436256	0.0219642	0
b0146	sfsA	0.929342	0.60617	0.786588	0.112803	0.0742557	6.95e-09	2
b0147	ligT	0.970399	0.93815	0.416504	0.0437879	0.141505	0.000477591	5
b0148	hrpB	0.837319	0.00640245	0.299179	8.70242e-10	0.0612132	3.07e-13	2
b0149	mrcB	0.824961	0.0237673	0.296623	1.912e-08	0.0402503	2.02e-12	2
b0150	fhuA	1.04424	0.694513	0.175413	2.79805e-08	0.0225841	1.88e-11	1
b0151	fhuC	0.870901	0.813586	0.0486358	0.000405305	0.00787607	9.41e-06	3
b0152	fhuD	0.905784	0.399044	0.157398	2.47708e-08	0.0416108	1.55e-10	1
b0153	fhuB	1.07886	0.771691	0.110277	7.89262e-06	0.0174136	3.41e-08	1
b0154	hemL	0.897026	0.573429	1.05738	0.771123	0.084809	1.87e-07	2
b0155	clcA	0.795133	0.0421196	0.718789	0.00750428	0.065877	1.86e-10	2
b0156	erpA	0.93247	0.733344	0.926794	0.711222	0.562062	0.0168448	0
b0157	yadS	0.930635	0.176477	0.362779	3.14975e-09	0.120282	3.01e-12	2
b0158	btuF	0.908353	0.16696	0.194347	4.23917e-10	0.0207908	1.21e-13	1
b0159	mtn	0.87342	0.359897	0.116897	5.09671e-08	0.016289	1.16e-10	1
b0160	dgt	0.914362	0.433547	0.120544	5.7049e-09	0.0391666	1.04e-10	1
b0161	degP	0.773484	0.192858	1.6804	0.0186125	0.0541859	3.47e-08	2
b0162	cdaR	1.10518	0.275344	0.553165	5.61635e-05	0.116108	5.27e-10	2
b0163	yaeH	0.880334	0.761637	1.1179	0.790705	0.266648	0.00945895	0
b0164	yaeI	0.910852	0.363334	0.154412	6.35373e-09	0.0265608	1.23e-11	1
b0166	dapD	0.842146	0.509514	0.254834	0.000329861	0.152025	2.64e-05	5
b0167	glnD	0.887546	0.249939	0.175609	1.18388e-08	0.0180571	4.5e-12	1
b0168	map	0.935961	0.300726	0.183728	1.74576e-10	0.0291318	1.63e-13	1
b0169	rpsB	1.25431	0.0531725	0.928721	0.488846	1.5306	0.00221078	0
b0170	tsf	1.0444	0.816159	0.303176	7.89689e-05	0.359219	0.000258873	5
b0171	pyrH	0.936278	0.730802	0.0869314	1.98707e-07	0.00360504	8.39e-11	3
b0172	frr	0.907601	0.553784	0.159587	6.06608e-07	0.00795413	7.58e-11	3
b0173	dxr	0.860211	0.497966	0.116141	2.15168e-06	0.0181851	7.55e-09	1
b0174	ispU	1.07783	0.744124	0.183901	2.42304e-05	0.00416398	5.99e-10	3
b0175	cdsA	1.02644	0.896039	0.235416	2.87171e-05	0.0146017	1.9e-09	1
b0176	rseP	0.98516	0.946244	0.248412	9.1183e-05	0.0151589	5.5e-09	1
b0177	bamA	1.07224	0.813494	0.199786	0.000270359	0.00507266	9.11e-09	3
b0178	skp	0.988322	0.970126	0.0898364	1.76394e-05	0.00442798	1.26e-08	3
b0179	lpxD	0.907819	0.737153	0.0901154	8.47472e-06	0.00658324	1.13e-08	3
b0180	fabZ	0.861797	0.142241	0.117986	1.12369e-09	0.0175975	2.73e-12	1
b0181	lpxA	0.78236	0.0348862	0.099049	1.04984e-09	0.0471301	7.61e-11	1
b0182	lpxB	0.7153	0.0431436	0.148752	1.84001e-07	0.0537689	3.54e-09	1
b0183	rnhB	0.920261	0.51489	0.311834	3.64324e-06	0.105476	9.42e-09	2
b0184	dnaE	1.0179	0.904008	0.245726	2.74349e-06	0.013137	8.47e-11	1
b0185	accA	0.927868	0.402748	0.272382	5.2303e-08	0.0323547	5.81e-12	1
b0186	ldcC	0.881279	0.727445	0.290381	0.00602816	0.0201048	9.13e-07	1
b0187	yaeR	0.876711	0.558994	0.256761	0.000115575	0.0468071	1.06e-07	2
b0188	tilS	0.807744	0.139442	0.242994	1.27992e-06	0.0552523	1.79e-09	2
b0189	rof	0.842186	0.366544	0.452109	0.00153743	0.215556	9.66e-06	5
b0190	yaeQ	0.962777	0.900102	0.091177	1.35299e-05	0.00476222	1.01e-08	3
b0191	yaeJ	1.05193	0.824587	0.158176	1.14729e-05	0.0136576	5.7e-09	1
b0192	nlpE	1.05744	0.666389	0.218081	4.11461e-07	0.0245076	1.06e-10	1
b0193	yaeF	0.894199	0.335064	0.175256	3.66517e-08	0.147126	1.51e-08	2
b0194	proS	0.95707	0.774962	0.160426	3.71716e-07	0.0305264	9.54e-10	1
b0195	yaeB	0.979265	0.885086	0.152813	1.77553e-07	0.0232953	2.81e-10	1
b0196	rcsF	0.959739	0.850021	0.150279	5.95648e-06	0.00848279	1.34e-09	3
b0197	metQ	1.25031	0.181778	0.540997	0.00294077	0.071437	1.86e-08	2
b0198	metI	1.42174	0.326854	1.09912	0.787264	0.136576	0.000194958	5
b0199	metN	2.18607	0.110479	3.78866	0.0141194	0.538969	0.195987	0
b0200	gmhB	0.84258	0.559473	0.118323	2.57871e-05	0.00655829	1.26e-08	3
b0207	dkgB	0.935782	0.542752	0.180838	2.82425e-08	0.0556378	2.1e-10	1
b0208	yafC	0.752902	0.0208338	0.184849	2.55237e-08	0.103746	1.65e-09	2
b0209	yafD	0.928367	0.780858	0.627047	0.103993	0.603597	0.0819697	0
b0210	yafE	0.62876	0.169806	0.86903	0.663265	1.31588	0.401233	0
b0211	mltD	0.612455	0.0479747	0.248342	9.1791e-05	0.0133986	4.24e-09	1
b0212	gloB	1.84495	0.000147916	0.243664	1.13831e-07	0.116936	2.36e-09	5
b0213	yafS	0.900765	0.430757	0.127526	2.90723e-08	0.0296701	1.95e-10	1
b0214	rnhA	0.916394	0.721816	0.0917012	2.22206e-06	0.0162749	1.6e-08	1
b0215	dnaQ	0.83405	0.483449	0.336875	0.00155999	0.0940753	3.6e-06	2
b0217	yafT	0.767286	0.139261	0.197433	2.55029e-06	0.137164	4.21e-07	2
b0218	yafU	0.982611	0.861086	0.715226	0.00683663	0.821594	0.0730612	0
b0219	yafV	0.907998	0.727503	0.44621	0.0140181	0.159325	5.76e-05	5
b0220	ivy	0.944425	0.839041	0.190948	0.000151106	0.025375	1.65e-07	1
b0221	fadE	0.874254	0.573756	0.969386	0.895596	0.190878	3.84e-05	5
b0222	lpcA	0.866217	0.45417	0.135136	1.09416e-06	0.0207785	2.57e-09	1
b0223	yafJ	0.994408	0.977885	0.16116	4.47378e-06	0.017162	3.1e-09	1
b0224	yafK	1.16247	0.462634	0.235226	3.14524e-05	0.00530756	2.82e-10	3
b0225	yafQ	0.954878	0.856057	0.178873	5.01847e-05	0.00804094	5.31e-09	3
b0226	dinJ	0.872966	0.397703	0.259322	6.98701e-06	0.00967033	8.5e-11	1
b0227	yafL	0.935762	0.552766	0.921402	0.466424	0.759108	0.0296617	0
b0228	yafM	1.1787	0.410074	0.172957	4.76786e-06	0.068302	1.07e-07	2
b0229	lfhA	0.906565	0.108582	1.12979	0.0535	0.847362	0.0142964	0
b0230	lafU	0.890014	0.237609	0.982204	0.850112	0.812801	0.0501132	0
b0231	dinB	0.872015	0.231949	0.483507	6.15205e-05	0.0535595	2.24e-10	2
b0232	yafN	1.00802	0.924203	0.277695	3.97738e-08	0.0556466	1.94e-11	2
b0233	yafO	0.957461	0.830464	0.165199	5.14057e-06	0.0631993	1.13e-07	2
b0234	yafP	0.935438	0.400694	0.355922	1.44329e-07	0.264474	1.41e-08	5
b0235	ykfJ	0.960968	0.836849	1.32342	0.168663	0.693994	0.0822551	0
b0236	prfH	0.927663	0.26023	0.765272	0.00183677	0.624639	2.68e-05	0
b0237	pepD	0.896241	0.689259	0.128518	2.10551e-05	0.0044617	3.49e-09	3
b0238	gpt	0.917464	0.556366	0.14771	1.52354e-07	0.0207032	2.12e-10	1
b0239	frsA	0.879715	0.0651237	0.151842	7.46887e-11	0.0206164	7.85e-14	1
b0240	crl	1.35975	0.537452	1.11431	0.826509	0.538139	0.227508	0
b0241	phoE	1.07817	0.844756	1.61627	0.229602	1.05807	0.883189	0
b0242	proB	0.917774	0.576367	0.155132	2.99626e-07	0.022971	4.33e-10	1
b0243	proA	0.935012	0.832692	0.371984	0.0101427	0.280492	0.00233987	5
b0245	ykfI	0.781872	0.136071	0.583017	0.00549297	0.170537	5.68e-07	5
b0246	yafW	0.815487	0.243238	0.694844	0.0519168	0.144488	5.28e-07	5
b0247	ykfG	0.741723	4.71756e-05	0.781612	0.000214922	0.496341	2.6e-08	5
b0248	yafX	0.855711	0.0767494	0.554591	2.66275e-05	0.0814865	5.08e-11	2
b0249	ykfF	0.880189	0.109371	0.484446	2.23932e-06	0.070928	1.39e-11	2
b0250	ykfB	0.946847	0.798317	0.278621	0.000132457	0.0873797	5.57e-07	2
b0251	yafY	0.980565	0.924489	0.285423	0.000121459	0.126363	1.83e-06	2
b0252	yafZ	0.987305	0.947814	0.728865	0.128693	0.447092	0.00192556	5
b0253	ykfA	0.600342	2.29356e-05	0.215459	1.12116e-09	0.131823	8.19e-11	5
b0254	perR	0.926306	0.539551	0.309766	2.88539e-06	0.124113	1.56e-08	2
b0256	insI	0.957626	0.712547	0.157532	2.92134e-08	0.0274868	5.74e-11	1
b0258	ykfC	0.830236	0.00731001	0.371255	1.06028e-08	0.257237	5.56e-10	5
b0259	insH	1.25613	0.00826213	0.348926	4.87782e-08	0.070491	8.38e-12	2
b0260	mmuP	1.57338	0.227238	8.74806	0.000127872	12.8482	3.46e-05	6
b0261	mmuM	0.928771	0.694396	1.66245	0.0200834	2.52033	0.000563523	6
b0262	afuC	0.783037	0.400755	1.02181	0.93976	2.43393	0.0100858	0
b0263	afuB	0.774766	0.307978	0.874673	0.585047	1.00775	0.974684	0
b0264	insB	0.77694	0.302701	0.290087	0.000383749	0.178621	2.88e-05	5
b0265	insA	0.889801	0.609734	0.289276	0.000268069	0.142167	6.84e-06	5
b0266	yagB	0.935731	0.318723	0.246023	1.55117e-09	0.161643	1.32e-10	5
b0267	yagA	0.882496	0.736049	1.81678	0.129793	0.503885	0.0875746	0
b0268	yagE	1.03818	0.792909	0.361918	3.26503e-05	0.319669	1.25e-05	5
b0269	yagF	0.859793	0.598352	1.19777	0.530477	0.610078	0.106469	0
b0270	yagG	0.762185	0.172151	1.03674	0.848632	0.646191	0.0401819	0
b0271	yagH	0.681704	0.0204074	0.828299	0.203553	0.555106	0.00183481	0
b0272	yagI	0.82867	0.423749	1.23817	0.365552	1.02198	0.924979	0
b0273	argF	0.846739	0.224241	0.686632	0.0155902	0.294075	3.39e-06	5
b0276	yagJ	0.752835	0.00456683	0.396237	4.48791e-07	0.290428	3.2e-08	5
b0277	yagK	0.923637	0.696738	0.805567	0.301049	0.520317	0.00847508	0
b0278	yagL	0.994108	0.944547	1.00886	0.917306	0.873374	0.134335	0
b0279	yagM	0.982393	0.774873	0.829117	0.011799	0.733282	0.000509162	0
b0280	yagN	1.12957	0.301377	0.358973	4.79999e-06	0.0836014	1.52e-09	2
b0281	intF	1.12359	0.454827	0.447345	0.000365153	0.0411557	2.26e-09	2
b0283	paoD	0.786437	0.135698	0.713673	0.0463431	0.212115	1.47e-06	5
b0284	paoC	0.726068	0.00480474	0.69716	0.00230889	0.157226	2.5e-09	5
b0285	paoB	0.687594	8.28742e-05	0.919627	0.176468	0.473791	2.17e-07	5
b0286	paoA	0.876211	0.0730448	1.65855	2.12846e-05	0.392861	9.58e-08	6
b0287	yagU	1.08334	0.716597	0.0206393	1.03159e-08	0.00722115	1.1e-09	1
b0288	ykgJ	0.836495	0.162146	0.240102	4.17993e-07	0.198121	1.33e-07	5
b0289	yagV	1.01883	0.805637	0.530211	8.42389e-06	0.275719	1.45e-08	5
b0290	yagW	0.968465	0.82521	0.426572	0.000152805	0.149345	1.59e-07	5
b0291	yagX	0.891764	0.383494	0.756423	0.0514139	0.24396	8.08e-07	5
b0292	matC	0.723399	0.082406	1.00792	0.963267	0.210821	4.2e-06	5
b0293	matB	0.683371	0.0457911	0.688633	0.0494702	0.189407	2.23e-06	5
b0294	matA	0.61752	0.0331684	1.21631	0.337167	0.423638	0.00142349	5
b0295	ykgL	1.10339	0.728002	1.53047	0.153812	0.823386	0.496199	0
b0296	ykgM	1.04119	0.885971	5.66766	0.000105459	1.50885	0.165722	6
b0297	eaeH	1.05449	0.377246	1.04966	0.418288	1.0463	0.448775	0
b0298	insE	0.735298	0.00887702	0.308934	3.10199e-07	0.0490556	4.79e-11	2
b0299	insF	0.784227	0.00755507	0.167733	5.53587e-10	0.0530075	5e-12	1
b0300	ykgA	1.17679	0.432144	0.204622	1.57564e-05	0.077264	2.36e-07	2
b0301	ykgB	0.924175	0.848004	1.13908	0.752021	0.394828	0.0438704	0
b0303	ykgI	0.904393	0.142339	0.772051	0.00230573	0.692269	0.000193627	0
b0304	ykgC	0.906344	0.684084	0.538758	0.0257159	0.29727	0.000483102	5
b0305	ykgD	1.04576	0.356922	0.993632	0.892946	0.865524	0.0114004	0
b0306	ykgE	1.09609	0.684287	0.480156	0.00782313	0.19197	2.56e-05	5
b0307	ykgF	1.20972	0.209193	0.126713	7.56215e-08	0.0688086	6.9e-09	2
b0308	ykgG	1.25861	0.109944	0.259889	1.73083e-06	0.15507	9.33e-08	2
b0310	ykgH	1.00525	0.986488	1.5988	0.152102	1.01629	0.958355	0
b0311	betA	0.682688	0.193764	0.104119	1.1641e-05	0.0531851	1.22e-06	1
b0312	betB	1.12772	0.820605	0.289308	0.0380929	0.0886996	0.000958915	2
b0313	betI	1.29577	0.666145	0.318121	0.0788295	0.0872858	0.00206085	2
b0314	betT	1.98156	0.447935	1.18268	0.850121	1.99899	0.442324	0
b0315	yahA	1.06451	0.635407	0.39431	3.38931e-05	0.294034	3.31e-06	5
b0316	yahB	1.04034	0.717641	0.116071	3.6165e-09	0.0480843	1.44e-10	1
b0317	yahC	1.09421	0.393678	0.747274	0.0168532	0.77013	0.0278481	0
b0318	yahD	1.05859	0.682956	0.946215	0.691623	0.774586	0.0895856	0
b0319	yahE	0.994358	0.93262	0.761309	0.00207723	0.751676	0.00154119	0
b0320	yahF	0.952167	0.674909	0.634425	0.00269673	0.546835	0.000391493	0
b0321	yahG	1.02018	0.839132	0.818137	0.0638308	0.647694	0.00122033	0
b0323	yahI	1.10391	0.248251	0.78197	0.0127114	0.546431	2.63e-05	0
b0324	yahJ	0.826289	0.036441	0.408982	7.21032e-07	0.17272	1.44e-09	5
b0325	yahK	0.795871	0.39171	0.313178	0.00117231	0.0377505	2.4e-07	2
b0326	yahL	1.02097	0.846908	1.065	0.561188	1.02228	0.837613	0
b0327	yahM	1.07212	0.448835	0.66943	0.00119097	0.587402	0.000153181	0
b0328	yahN	0.822271	0.038792	0.36525	3.56318e-07	0.38954	6.45e-07	5
b0329	yahO	0.849153	0.429917	1.95077	0.00762336	0.437327	0.00212644	6
b0330	prpR	0.890901	0.615764	0.993472	0.977145	0.517317	0.0150137	0
b0331	prpB	1.67607	0.511708	7.24258	0.0268622	0.240747	0.0910475	0
b0333	prpC	1.03505	0.940562	4.02077	0.0120401	0.403828	0.0729546	0
b0334	prpD	0.969879	0.931361	4.96583	0.00105375	0.236896	0.00214275	6
b0335	prpE	0.817749	0.235063	1.96305	0.00188104	0.424826	0.000357978	6
b0336	codB	1.07071	0.671319	0.00370203	1.68234e-11	0.00309006	1.24e-11	4
b0337	codA	1.00916	0.947593	0.0206467	1.37776e-10	0.00795212	1.72e-11	1
b0338	cynR	0.936976	0.599711	0.229185	3.66769e-07	0.100678	6.22e-09	2
b0339	cynT	0.782852	0.000366355	0.440249	1.09396e-08	0.314021	4.34e-10	5
b0340	cynS	1.06298	0.282472	0.560626	1.16947e-06	0.42079	3.02e-08	5
b0341	cynX	1.03689	0.758521	0.939927	0.600869	0.375145	8.8e-06	5
b0342	lacA	0.968233	0.684878	0.745293	0.00373008	0.641349	0.000219316	0
b0343	lacY	0.818244	0.0373445	0.518866	1.72815e-05	0.418674	1.5e-06	5
b0344	lacZ	0.821822	0.00320348	0.53639	3.3685e-07	0.46273	4.83e-08	5
b0345	lacI	0.904106	0.78416	0.435156	0.0435484	0.251907	0.00348621	5
b0346	mhpR	1.04611	0.93692	0.539055	0.292601	0.104052	0.00244509	2
b0347	mhpA	1.04855	0.671233	1.15115	0.224128	0.851021	0.168568	0
b0348	mhpB	0.934827	0.672928	0.781873	0.144418	0.504433	0.00144695	0
b0349	mhpC	0.893759	0.228828	0.320899	2.17848e-07	0.190983	6.82e-09	5
b0350	mhpD	0.789179	0.0329555	0.347697	8.98308e-07	0.221182	3.52e-08	5
b0351	mhpF	0.689774	1.02221e-05	0.40772	3.55789e-09	0.272447	1.09e-10	5
b0352	mhpE	0.77471	0.00385829	0.35006	4.19065e-08	0.256418	3.76e-09	5
b0353	mhpT	1.14428	0.581464	0.966766	0.889197	0.638306	0.0879497	0
b0354	yaiL	0.953979	0.869064	0.200662	0.000214889	0.192643	0.000177458	5
b0355	frmB	1.02026	0.889904	2.34816	0.000150118	1.17239	0.287232	6
b0356	frmA	1.07356	0.794677	5.20099	0.000121471	4.42231	0.000268499	6
b0357	frmR	1.08447	0.740796	6.15013	2.32649e-05	2.64343	0.00243108	6
b0358	yaiO	0.942959	0.892384	3.55576	0.0140086	3.01663	0.0269068	0
b0360	insC	0.770453	0.146672	0.240421	8.18129e-06	0.0432324	6.57e-09	1
b0361	insD	0.864666	0.333487	0.307287	1.18666e-05	0.0552351	3.61e-09	2
b0363	yaiP	0.971851	0.85108	1.60363	0.0102202	0.968504	0.833379	0
b0364	yaiS	1.14897	0.258936	1.10125	0.424813	0.907515	0.422039	0
b0365	tauA	0.752828	0.450863	1.8957	0.108437	0.181509	0.000921572	6
b0366	tauB	0.690609	0.0311124	0.768587	0.1042	0.158174	2.95e-07	5
b0367	tauC	0.725166	0.00357045	1.06352	0.479709	0.275849	4.72e-08	5
b0368	tauD	0.893324	0.103689	0.808856	0.00744547	0.180198	2.2e-10	5
b0369	hemB	0.78821	0.00936434	0.125831	1.61222e-10	0.0247172	6.63e-13	1
b0375	yaiV	0.91149	0.285813	0.902302	0.239598	0.877365	0.14299	0
b0376	ampH	0.917533	0.630069	0.371566	0.000229461	0.0277345	2.96e-09	1
b0377	sbmA	1.09043	0.803912	0.458545	0.0454869	0.0558163	9.27e-06	2
b0378	yaiW	1.01889	0.965592	0.223471	0.0057001	0.0172084	3.23e-06	1
b0379	yaiY	1.06737	0.339736	1.40866	0.000417161	0.625257	3.59e-05	0
b0380	yaiZ	1.03713	0.786476	0.221368	6.50719e-07	0.0523883	1.35e-09	1
b0381	ddlA	0.718439	0.00564865	0.212643	2.29662e-08	0.0405288	2.48e-11	1
b0382	iraP	0.686041	0.000141617	0.393714	5.67018e-08	0.382169	4.25e-08	5
b0383	phoA	1.07317	0.253042	0.177532	9.79699e-11	0.148101	3.82e-11	2
b0384	psiF	0.971778	0.841691	0.701242	0.0301458	0.270347	4.02e-06	5
b0385	adrA	0.96202	0.88521	0.651036	0.13276	0.310014	0.00131549	5
b0386	proC	0.891073	0.36708	0.130246	2.16794e-08	0.0205766	5.14e-11	1
b0387	yaiI	0.862608	0.552428	0.119476	6.61286e-06	0.0318884	8.89e-08	1
b0388	aroL	0.853282	0.333754	0.112418	1.10174e-07	0.0139553	2.14e-10	1
b0389	yaiA	1.1102	0.562488	0.210992	6.13713e-06	0.0314132	4.41e-09	1
b0390	aroM	1.05152	0.788686	0.337419	0.00016805	0.0539382	3.24e-08	2
b0391	yaiE	1.04201	0.702781	0.28952	5.08651e-07	0.0322619	3.91e-11	1
b0392	ykiA	0.788528	0.0739337	0.353039	6.99995e-06	0.209881	1.93e-07	5
b0393	rdgC	0.757004	0.00691235	0.157063	1.21424e-09	0.0442564	8.84e-12	1
b0394	mak	0.844795	0.0355588	0.103414	3.80742e-11	0.0521249	3.12e-12	1
b0396	araJ	0.822091	0.0491182	0.41719	2.1837e-06	0.178395	4.48e-09	5
b0397	sbcC	0.924331	0.293835	0.272167	9.11669e-09	0.025911	5.36e-13	1
b0398	sbcD	0.877327	0.334648	0.165639	1.1491e-07	0.0523281	1.16e-09	1
b0399	phoB	0.870166	0.212529	0.495399	6.34593e-05	0.434578	1.55e-05	5
b0400	phoR	0.959033	0.79283	0.805922	0.195138	1.12384	0.469095	0
b0401	brnQ	0.859316	0.606873	0.349346	0.00452005	0.100635	1.47e-05	2
b0402	proY	0.90515	0.670782	0.395259	0.00242484	0.0308462	4.94e-08	1
b0403	malZ	0.854968	0.036177	0.0851887	9.07057e-12	0.0391989	6.72e-13	1
b0404	acpH	0.936724	0.382586	0.253637	6.02113e-09	0.157763	3.71e-10	5
b0405	queA	0.849808	0.449865	0.132748	2.79529e-06	0.00630239	6.09e-10	3
b0406	tgt	1.10438	0.342909	0.489758	3.85541e-05	0.115765	1.95e-09	2
b0407	yajC	1.01064	0.952343	0.179541	2.38342e-06	0.0186008	1.07e-09	1
b0408	secD	0.939698	0.578008	0.215507	9.75783e-08	0.0363307	7.36e-11	1
b0409	secF	0.903459	0.422406	0.263516	9.78259e-07	0.065877	1.4e-09	2
b0410	yajD	0.996763	0.987905	0.397169	0.00142421	0.033249	2.71e-08	1
b0411	tsx	0.756683	0.000184299	0.0229887	8.49132e-15	0.0135315	2.43e-15	1
b0412	yajI	0.838451	0.00374375	0.692916	1.68646e-05	0.443818	1.39e-08	5
b0413	nrdR	0.95741	0.865339	0.196479	8.41623e-05	0.00741126	4.91e-09	3
b0414	ribD	0.891931	0.535731	0.233081	1.29597e-05	0.0083767	2.59e-10	3
b0415	ribE	0.973421	0.880319	0.168548	1.89067e-06	0.0129771	5.21e-10	1
b0416	nusB	0.972792	0.848842	0.168339	2.81428e-07	0.016306	1.17e-10	1
b0417	thiL	0.771152	0.268275	0.133148	5.11239e-06	0.0165014	8.27e-09	1
b0418	pgpA	0.897051	0.700847	0.143587	4.33488e-05	0.0429607	6.79e-07	1
b0419	yajO	0.752695	0.000102027	0.273564	1.25756e-10	0.0382956	1.96e-14	2
b0420	dxs	0.89754	0.687049	0.10397	7.68818e-06	0.0118745	1.84e-08	1
b0421	ispA	0.864337	0.676469	0.12281	0.000125478	0.00383677	2.58e-08	3
b0422	xseB	1.14821	0.562068	0.173625	2.37739e-05	0.00300367	4.66e-10	3
b0423	thiI	0.976326	0.73922	0.209311	1.44701e-09	0.014847	1.22e-13	1
b0424	yajL	0.882267	0.412798	0.12476	9.64448e-08	0.0400552	1.7e-09	1
b0425	panE	0.889334	0.146652	0.166689	7.09848e-10	0.0188547	3.78e-13	1
b0426	yajQ	0.759145	0.00018035	0.178126	1.26012e-11	0.0351972	2.31e-14	1
b0427	yajR	0.781667	0.116054	0.173954	3.6995e-07	0.0409	1.41e-09	1
b0428	cyoE	1.0894	0.469099	0.134034	1.2929e-08	0.0246149	4.14e-11	1
b0429	cyoD	1.22697	0.0836127	0.185863	3.49671e-08	0.0386474	7.3e-11	1
b0430	cyoC	1.24542	0.560527	0.0901551	7.46912e-05	0.00316646	3.66e-08	3
b0431	cyoB	1.29547	0.499463	0.150977	0.000517806	0.00309547	3.98e-08	3
b0432	cyoA	1.32398	0.558959	0.160686	0.00301628	0.00146476	1.06e-07	3
b0433	ampG	0.899339	0.787349	0.0907606	0.000112902	0.0110217	5.31e-07	1
b0434	yajG	0.879974	0.765491	0.115167	0.00047495	0.0134997	1.72e-06	1
b0435	bolA	0.877986	0.583258	0.990793	0.968636	0.119969	4.51e-06	5
b0436	tig	0.917896	0.727558	0.0656104	7.12906e-07	0.00288715	6.19e-10	3
b0437	clpP	0.815518	0.455168	0.637761	0.118202	0.717232	0.23463	0
b0438	clpX	0.854569	0.425775	0.680044	0.0698555	0.862955	0.454166	0
b0439	lon	1.39088	0.350197	1.48851	0.26496	3.30101	0.00561792	6
b0440	hupB	0.9462	0.65317	0.0740401	1.81912e-09	0.0172831	2.77e-11	1
b0441	ppiD	0.856691	0.192086	0.0888709	1.71763e-09	0.0142514	8.44e-12	1
b0442	ybaV	0.940083	0.432138	0.282354	2.10708e-08	0.15222	5.12e-10	5
b0443	fadM	0.920469	0.648885	0.487898	0.00247792	0.257748	2.18e-05	5
b0444	queC	0.735373	0.0143467	0.287052	4.11792e-07	0.121507	3.31e-09	2
b0445	ybaE	1.10062	0.640573	0.445152	0.00247871	0.107331	8.25e-07	5
b0446	cof	0.87964	0.729734	2.41685	0.0354352	0.931184	0.847343	0
b0447	ybaO	0.916423	0.71853	0.372447	0.00202242	0.0423281	1.61e-07	2
b0448	mdlA	0.959305	0.773829	0.394955	7.47732e-05	0.113666	4.47e-08	2
b0449	mdlB	0.84771	0.343803	0.580889	0.00889127	0.169394	1.26e-06	5
b0450	glnK	0.651308	0.273675	0.391744	0.0304448	0.218122	0.00227734	5
b0451	amtB	0.894805	0.756415	0.526089	0.0962809	0.0819484	3.81e-05	2
b0452	tesB	0.904524	0.763044	0.196669	0.000595382	0.0347525	1.64e-06	1
b0453	ybaY	0.797803	0.237304	0.505784	0.00376432	0.0845513	1.29e-07	2
b0454	ybaZ	0.82407	0.3106	1.0326	0.8628	0.419672	0.000820174	5
b0456	ybaA	0.957717	0.698946	0.608477	0.0011349	0.104755	2.84e-09	2
b0457	ylaB	1.04148	0.755637	0.418526	5.53052e-05	0.0582373	1.43e-09	2
b0458	ylaC	1.1606	0.459422	0.421399	0.00133881	0.0314205	1.15e-08	1
b0459	maa	0.953022	0.846245	0.477766	0.0127231	0.0380678	1.52e-07	2
b0460	hha	1.04701	0.899335	0.848375	0.652331	0.051834	1.07e-05	2
b0461	tomB	0.94015	0.860985	0.774436	0.47412	0.0469263	6.21e-06	2
b0462	acrB	0.940455	0.560021	0.282348	3.27627e-07	0.0335056	3.31e-11	1
b0463	acrA	0.931918	0.696849	0.198487	4.70368e-06	0.0045416	7.3e-11	3
b0464	acrR	1.02801	0.777996	0.416425	4.76239e-06	0.084006	3.53e-10	2
b0465	kefA	0.852912	0.551988	0.298582	0.000979186	0.027483	1.17e-07	1
b0466	ybaM	0.965842	0.683271	0.39055	7.28072e-07	0.12963	5.64e-10	5
b0467	priC	0.869975	0.030489	0.268531	7.62211e-10	0.138832	1.64e-11	5
b0468	ybaN	0.973382	0.92908	0.139009	6.85055e-05	0.00489252	1.09e-08	3
b0469	apt	0.810511	0.465893	0.0709893	3.3898e-06	0.00601906	8.62e-09	3
b0470	dnaX	0.722058	0.310221	0.137565	8.26609e-05	0.0200854	2.42e-07	1
b0471	ybaB	1.05087	0.84247	0.200368	7.4265e-05	0.00393306	1.21e-09	3
b0472	recR	0.903174	0.66156	0.14251	8.12772e-06	0.00823693	2.31e-09	3
b0473	htpG	1.01401	0.969408	2.10862	0.0621799	4.95882	0.00122564	6
b0474	adk	0.950321	0.777705	0.0682977	4.96593e-08	0.00431752	6.63e-11	3
b0475	hemH	0.778909	0.108301	0.371599	4.61274e-05	0.109245	3.91e-08	2
b0476	aes	0.89211	0.638649	0.87602	0.586902	0.82001	0.419898	0
b0477	gsk	0.873746	0.365296	0.172306	3.40805e-07	0.0822311	1.36e-08	2
b0478	ybaL	1.15107	0.307033	0.507655	0.000467126	0.196301	3.16e-07	5
b0479	fsr	0.944335	0.389716	0.189453	3.31083e-10	0.112172	2.49e-11	2
b0480	ushA	0.88007	0.423854	0.205599	1.70067e-06	0.0734256	1.79e-08	2
b0481	ybaK	0.740332	0.0639201	1.16887	0.303626	0.192499	6.74e-07	5
b0482	ybaP	0.86149	0.412975	4.35018	9.93405e-06	2.52335	0.00039873	6
b0483	ybaQ	0.882287	0.490773	17.2245	2.7854e-08	13.37	6.57e-08	6
b0484	copA	0.495579	0.0528116	23.5615	2.40409e-06	18.6081	4.73e-06	6
b0485	ybaS	0.372888	9.62823e-07	0.11467	6.87998e-10	0.0453236	2.37e-11	1
b0486	ybaT	0.601525	0.0015351	0.18232	7.27451e-08	0.0333763	1.14e-10	1
b0487	cueR	0.842284	0.0317992	0.361293	6.3073e-08	0.0721439	8.63e-12	2
b0488	ybbJ	0.842305	0.44987	0.359422	0.000958707	0.063134	2.75e-07	2
b0489	qmcA	0.834706	0.287372	0.321058	4.27495e-05	0.0648109	1.81e-08	2
b0490	ybbL	0.844355	0.509311	0.110515	6.16403e-06	0.0271592	7.56e-08	1
b0491	ybbM	0.808735	0.617594	0.318218	0.0201768	2.08414	0.106017	0
b0492	ybbN	0.879193	0.765021	0.633155	0.301725	0.984259	0.970547	0
b0493	ybbO	1.03817	0.853515	0.157897	4.13608e-06	0.00516007	2.77e-10	3
b0494	tesA	0.992923	0.943051	0.543173	0.000109106	0.111246	1.28e-09	2
b0495	ybbA	0.905422	0.742214	1.55077	0.167116	0.196206	0.000288791	6
b0496	ybbP	0.960836	0.758218	1.51483	0.00862671	0.613311	0.00335885	0
b0497	rhsD	0.935758	0.598269	0.66286	0.00754129	0.588208	0.00159832	0
b0498	ybbC	0.967957	0.89794	0.111637	6.51726e-06	0.0679102	1.09e-06	2
b0499	ylbH	1.01896	0.958364	0.288776	0.00572844	0.167661	0.000541668	5
b0500	ybbD	0.973683	0.739624	0.879035	0.130536	0.953114	0.552204	0
b0502	ylbG	0.894826	0.218052	0.323123	1.66154e-07	0.113641	3.78e-10	2
b0503	selU	0.777891	0.00527532	0.231312	2.67717e-09	0.0761893	1.31e-11	2
b0504	allS	0.840634	0.0145253	0.690884	0.000103325	0.608894	9.23e-06	0
b0505	allA	1.0265	0.724135	0.466119	1.36283e-06	0.430154	5.58e-07	5
b0506	allR	0.829172	0.30352	0.492036	0.00230433	0.0966985	1.49e-07	2
b0507	gcl	0.755012	0.0540323	0.736318	0.0389375	0.67677	0.0128834	0
b0508	hyi	0.947206	0.850368	1.06679	0.822151	0.754175	0.338206	0
b0509	glxR	0.901576	0.388875	0.806747	0.0922722	0.619396	0.00211179	0
b0511	ybbW	1.04107	0.85604	1.42464	0.133761	1.08248	0.721652	0
b0512	allB	1.08322	0.283241	1.28789	0.0052347	0.776413	0.00522724	0
b0513	ybbY	0.79705	0.0023141	0.575641	2.25851e-06	0.373736	1.19e-08	5
b0514	glxK	0.902826	0.354014	0.535284	0.000169363	0.235877	1.31e-07	5
b0515	ylbA	0.84453	0.0893365	0.123405	9.44157e-10	0.0682429	9.01e-11	2
b0516	allC	1.51569	0.0237755	0.446976	0.000467144	0.231916	3.8e-06	5
b0517	allD	1.10395	0.145023	0.752608	0.00117371	0.719836	0.000420549	0
b0518	fdrA	0.973119	0.634627	1.02515	0.664574	0.879867	0.0450271	0
b0520	ylbF	0.849008	0.0364328	0.602464	2.59873e-05	0.351791	4.34e-08	5
b0521	ybcF	0.898904	0.568864	0.458971	0.00170948	0.241039	1.78e-05	5
b0522	purK	0.967291	0.852735	0.0150731	7.3187e-10	0.00424753	6.08e-11	4
b0523	purE	0.856148	0.416321	0.027218	4.72349e-09	0.0104503	5.19e-10	1
b0524	lpxH	0.929174	0.666437	0.103048	1.31177e-07	0.00507018	4.98e-11	3
b0525	ppiB	1.10321	0.794192	0.0921942	8.43709e-05	0.00350393	4.55e-08	3
b0526	cysS	1.33159	0.000994013	0.245423	1.15114e-09	0.0488141	8.25e-13	1
b0527	ybcI	0.918322	0.283642	0.322786	5.67343e-08	0.0938925	5.69e-11	2
b0528	ybcJ	0.933805	0.720701	0.0875584	2.05481e-07	0.037008	1.27e-08	1
b0529	folD	0.906037	0.404462	0.0384592	1.34247e-10	0.00816757	3.37e-12	3
b0530	sfmA	1.01741	0.760969	0.974614	0.651321	0.945501	0.334385	0
b0531	sfmC	0.977149	0.737264	1.18369	0.0314157	0.981098	0.78161	0
b0532	sfmD	0.826036	0.0665535	0.870632	0.165725	0.662229	0.00135483	0
b0533	sfmH	1.15971	0.0075222	1.06418	0.18816	1.02641	0.566304	0
b0534	sfmF	0.9041	0.559944	1.17883	0.348631	0.931428	0.679859	0
b0535	fimZ	0.907512	0.371396	1.00639	0.952199	0.922031	0.451748	0
b0537	intD	0.808791	0.0711705	0.104797	2.03247e-09	0.0336528	4.36e-11	1
b0539	exoD	0.826344	0.0685995	0.384462	1.79108e-06	0.210278	2.12e-08	5
b0542	renD	0.840733	0.308132	1.10422	0.552797	0.491425	0.00147473	5
b0543	emrE	0.719906	0.00013839	0.319474	2.36844e-09	0.267554	6.11e-10	5
b0544	ybcK	0.872752	0.0651489	0.716316	0.000532129	0.757304	0.00186213	0
b0545	ybcL	0.727501	0.000389205	0.266737	1.59158e-09	0.225696	5.2e-10	5
b0546	ybcM	1.26699	0.0864041	0.121963	1.87857e-08	0.0991513	7.86e-09	2
b0547	ybcN	1.12261	0.56365	1.40395	0.111277	1.08056	0.697433	0
b0548	ninE	1.07877	0.477625	1.27751	0.0392482	1.09388	0.403237	0
b0549	ybcO	0.976835	0.850057	1.15802	0.253244	0.825676	0.144933	0
b0550	rusA	1.41757	0.0516435	1.45145	0.040152	0.809751	0.209848	0
b0551	quuD	1.14693	0.370412	1.24187	0.169725	1.03409	0.823076	0
b0553	nmpC	1.29745	0.0173248	0.00566049	2.0313e-13	0.00197872	3.49e-14	4
b0554	essD	0.975415	0.831879	0.120429	8.32167e-09	0.0622665	6.57e-10	2
b0555	arrD	0.820497	0.0438793	0.151682	1.60742e-09	0.10306	2.79e-10	2
b0556	rzpD	0.928023	0.529703	0.075685	1.35282e-09	0.0369168	1.34e-10	1
b0557	borD	0.877582	0.481933	0.101268	2.47314e-07	0.0195754	1.67e-09	1
b0558	ybcV	0.954295	0.615965	1.02993	0.750854	0.919466	0.375079	0
b0559	ybcW	0.771048	0.361907	0.612745	0.102845	0.574714	0.0700042	0
b0560	nohD	0.779475	0.0388259	0.393929	6.01091e-06	0.281222	3.93e-07	5
b0561	tfaD	0.987225	0.873488	1.11362	0.202361	0.979139	0.794269	0
b0562	ybcY	0.950367	0.569303	0.877457	0.162555	0.785397	0.0197262	0
b0563	tfaX	1.11545	0.389407	1.2173	0.137143	1.08766	0.504524	0
b0564	appY	0.995227	0.978379	1.02719	0.87928	0.846732	0.357269	0
b0565	ompT	1.3238	0.181813	0.367695	0.000510453	0.0060941	3.3e-10	3
b0566	envY	0.85992	0.377487	0.850264	0.344383	0.707969	0.0615239	0
b0567	ybcH	0.985166	0.801753	0.716707	0.000220336	0.543697	1.46e-06	0
b0568	nfrA	1.04185	0.640166	0.465722	5.74438e-06	0.100381	2.41e-10	2
b0569	nfrB	0.937583	0.170502	0.804356	0.000612936	0.465652	1.37e-08	5
b0570	cusS	0.68611	0.0878562	0.557158	0.0152057	0.0793311	2.55e-07	2
b0571	cusR	0.747559	0.122736	0.6069	0.0164098	0.0364259	5.82e-09	1
b0572	cusC	0.268189	0.000430804	1.42797	0.186485	0.218865	0.000146192	5
b0573	cusF	0.17235	0.00100909	1.11647	0.776379	0.0820627	7.29e-05	5
b0574	cusB	0.241807	0.00155495	1.18118	0.619591	0.163445	0.000277508	5
b0575	cusA	0.464713	7.15992e-05	1.26938	0.0667417	0.17935	6.31e-08	5
b0576	pheP	0.872915	0.168183	0.0947079	3.70795e-10	0.0490597	3.63e-11	1
b0577	ybdG	0.861627	0.545978	0.163811	2.39076e-05	0.0203054	2.64e-08	1
b0578	nfsB	0.95475	0.819939	0.0989272	5.73145e-07	0.00739564	5.51e-10	3
b0579	ybdF	0.808074	0.0673486	0.236687	1.15399e-07	0.134852	5.49e-09	2
b0580	ybdJ	1.26792	0.120761	0.325375	1.47322e-05	0.199724	6.34e-07	5
b0581	ybdK	0.785382	0.157492	0.810925	0.214188	0.0578572	1.05e-08	2
b0583	entD	1.132	0.518888	0.100667	3.36307e-07	0.00989328	5.23e-10	3
b0584	fepA	1.1031	0.620169	0.10512	5.44044e-07	0.00885906	5.78e-10	3
b0585	fes	0.837948	0.541109	0.106607	1.52399e-05	0.00978688	2.35e-08	3
b0586	entF	0.999955	0.999891	0.159143	0.000235684	0.0151892	2.21e-07	1
b0587	fepE	0.87087	0.283695	0.602495	0.00214709	0.410796	3.31e-05	5
b0588	fepC	0.929278	0.719385	0.0954991	5.06733e-07	0.0115221	1.36e-09	1
b0589	fepG	0.696879	0.196004	0.115964	1.15316e-05	0.0197661	5.57e-08	1
b0590	fepD	0.77088	0.164483	0.121693	3.93732e-07	0.0452462	1.15e-08	1
b0591	entS	0.773008	0.0301545	0.044341	7.14433e-11	0.0115037	2.36e-12	1
b0592	fepB	0.782668	0.211079	0.123031	6.82842e-07	0.018407	1.8e-09	1
b0593	entC	0.897629	0.655535	0.120586	5.63776e-06	0.00612677	1.91e-09	3
b0594	entE	0.957598	0.859204	0.111723	4.66036e-06	0.00436808	1.19e-09	3
b0595	entB	1.05117	0.837879	0.14067	1.18861e-05	0.00250129	4.65e-10	3
b0596	entA	1.04296	0.876167	0.193101	0.000115323	0.00549814	4.54e-09	3
b0597	entH	1.07193	0.83022	0.185656	0.000383386	0.00451234	1.74e-08	3
b0598	cstA	1.12366	0.562279	0.0683264	1.26145e-07	0.0951228	4.16e-07	1
b0599	ybdH	1.05494	0.850655	2.50353	0.00826358	1.83808	0.0535391	0
b0600	ybdL	0.901198	0.654705	4.09912	0.000115053	0.562726	0.0298031	6
b0601	ybdM	1.29705	0.0174221	0.659735	0.00112353	0.446984	6.39e-06	5
b0602	ybdN	1.05754	0.221414	1.03475	0.443823	0.632676	1.26e-06	0
b0603	ybdO	1.07948	0.276412	0.813021	0.0114054	0.650659	8.69e-05	0
b0604	dsbG	1.06303	0.722052	0.205278	3.61596e-06	0.0360275	4.28e-09	1
b0605	ahpC	0.940951	0.795574	0.614283	0.0600033	0.505494	0.0143548	0
b0606	ahpF	0.730579	0.353173	1.57664	0.188718	4.43321	0.00106034	6
b0607	uspG	0.756985	0.313579	0.214126	0.000184621	0.0667708	1.71e-06	2
b0608	ybdR	0.867952	0.626556	1.63309	0.113739	0.0949525	1.08e-05	6
b0610	rnk	0.983507	0.944089	0.149054	1.21841e-05	0.0280588	4.48e-08	1
b0611	rna	0.933717	0.73657	0.14603	2.94819e-06	0.0240027	7.23e-09	1
b0612	citT	1.03298	0.922196	1.70844	0.13039	0.744723	0.384835	0
b0613	citG	0.964519	0.643037	1.05348	0.506512	0.867308	0.0900889	0
b0614	citX	1.04836	0.396527	1.06378	0.273436	0.89617	0.0676818	0
b0615	citF	0.955887	0.454991	1.0572	0.360675	0.808887	0.00473735	0
b0616	citE	1.15557	0.61959	1.14488	0.641986	0.505944	0.0373178	0
b0617	citD	0.967773	0.785764	1.24169	0.0958603	0.826543	0.136497	0
b0618	citC	0.856166	0.0485523	0.62942	6.41532e-05	0.562889	1.07e-05	0
b0619	dpiB	0.871031	0.471808	0.128823	8.96608e-07	0.0403142	1.49e-08	1
b0620	dpiA	0.809581	0.184123	0.154244	2.7735e-07	0.0913349	2.89e-08	2
b0621	dcuC	0.312128	0.232047	0.136341	0.0551277	0.122339	0.045216	0
b0622	pagP	0.717517	0.417691	0.931056	0.859172	0.170663	0.00126366	5
b0623	cspE	0.842937	0.722497	0.0552192	0.000123909	0.00346191	4.11e-07	3
b0624	crcB	0.892049	0.429949	0.167091	2.34147e-07	0.0632708	4.3e-09	2
b0627	tatE	0.914642	0.678729	0.619392	0.0459411	0.180689	1.28e-05	5
b0628	lipA	0.87202	0.568058	0.526519	0.0206378	0.0261286	3.82e-08	1
b0629	ybeF	0.573785	5.85328e-07	0.29377	3.90778e-10	0.230637	7.13e-11	5
b0630	lipB	0.872921	0.315163	0.43751	9.11082e-05	0.0357684	3.55e-10	1
b0631	ybeD	1.02362	0.878149	1.55218	0.014865	0.30438	1.53e-05	6
b0632	dacA	0.955156	0.872068	0.2614	0.000782456	0.00607211	8.98e-09	3
b0633	rlpA	0.964025	0.871799	0.238637	8.73461e-05	0.0128167	4.73e-09	1
b0634	mrdB	0.934504	0.765865	0.334087	0.00065642	0.0102037	2.94e-09	1
b0635	mrdA	0.850176	0.596292	0.217263	0.000498235	0.0164597	1.22e-07	1
b0636	rlmH	0.802619	0.53433	0.159477	0.000362895	0.00794394	9.97e-08	3
b0637	ybeB	0.804825	0.655136	0.11762	0.00120409	0.00598487	1.1e-06	3
b0638	cobC	1.00753	0.969987	0.330595	0.000237678	0.0130905	1.48e-09	1
b0639	nadD	0.959012	0.887662	0.306637	0.00237448	0.00926367	2.88e-08	1
b0640	holA	1.22238	0.4432	0.299565	0.000823523	0.0134675	1.72e-08	1
b0641	lptE	1.04135	0.835614	0.220582	1.63952e-05	0.0135421	1.29e-09	1
b0642	leuS	1.11724	0.423731	0.280698	3.34542e-06	0.0325185	3.75e-10	1
b0643	ybeL	0.874371	0.552357	1.70618	0.0352708	0.332542	0.000576044	6
b0644	ybeQ	0.652288	0.128728	1.24706	0.411178	0.506539	0.0253492	0
b0645	ybeR	1.11849	0.239998	1.01794	0.84643	1.01846	0.842088	0
b0646	djlB	0.984681	0.836701	0.809519	0.0166031	0.678873	0.000398624	0
b0647	ybeT	1.01615	0.91035	1.03827	0.792152	0.882538	0.389456	0
b0648	ybeU	1.06807	0.440077	0.960263	0.631075	0.809213	0.02793	0
b0649	djlC	1.11242	0.183357	0.397749	3.33446e-07	0.242518	6.42e-09	5
b0650	hscC	0.708939	0.00633961	0.244017	9.36761e-08	0.186531	1.88e-08	5
b0651	rihA	0.976032	0.790336	0.0409773	1.62303e-11	0.00653569	2.17e-13	3
b0652	gltL	0.975165	0.847088	0.201946	2.90651e-07	0.0339187	2.78e-10	1
b0653	gltK	1.08693	0.655615	0.212095	8.79085e-06	0.00649282	1.87e-10	3
b0654	gltJ	0.998048	0.996032	0.110642	0.00022078	0.0133423	7.89e-07	1
b0655	gltI	0.950835	0.631419	0.202997	3.96895e-08	0.0701322	3.37e-10	2
b0657	lnt	0.829145	0.175581	0.30002	3.9316e-06	0.112292	1.8e-08	2
b0658	ybeX	0.955956	0.760195	0.363394	4.40682e-05	0.143504	1.52e-07	5
b0659	ybeY	0.903868	0.390879	0.421972	2.21894e-05	0.206578	1.1e-07	5
b0660	ybeZ	1.01543	0.83803	0.354082	9.56546e-08	0.256498	7.87e-09	5
b0661	miaB	0.804753	0.283131	0.143092	1.95937e-06	0.0291664	8.51e-09	1
b0662	ubiF	0.745154	0.0420311	0.430707	6.56477e-05	0.0890792	5.79e-09	2
b0674	asnB	0.830875	0.308291	0.149476	9.55541e-07	0.00881104	2.09e-10	3
b0675	nagD	0.845746	0.0716964	0.352389	2.89649e-07	0.0589221	2.62e-11	2
b0676	nagC	0.855079	0.639305	0.306821	0.00480392	0.00524069	2.87e-08	3
b0677	nagA	0.814448	0.625783	0.643173	0.305217	0.0121594	1.14e-06	3
b0678	nagB	0.72522	0.351065	0.373668	0.0139377	0.0202918	4.9e-07	1
b0679	nagE	0.69264	0.00174119	0.0407809	1.11683e-11	0.013259	6.41e-13	1
b0680	glnS	0.741294	0.0492289	0.0757684	5.46535e-09	0.0199158	1.08e-10	1
b0681	chiP	0.815337	0.0664995	0.800511	0.0488065	0.7067	0.00593533	0
b0682	chiQ	0.995648	0.982331	0.558994	0.0133145	0.314305	0.000153433	5
b0683	fur	0.804312	0.582552	2.1555	0.0739678	6.73036	0.000636421	6
b0684	fldA	0.989971	0.880531	0.238909	1.74744e-09	0.0589899	2.79e-12	2
b0685	ybfE	0.967121	0.660815	0.170569	7.6222e-10	0.0205168	4.41e-13	1
b0686	ybfF	0.937691	0.799459	0.142705	1.72775e-05	0.0141819	1.61e-08	1
b0687	seqA	0.822051	0.593341	0.101297	9.03257e-05	0.00824397	1.53e-07	3
b0688	pgm	0.840784	0.470429	0.372525	0.00179486	0.157713	1.56e-05	5
b0689	ybfP	0.828858	0.0787757	0.179755	1.10636e-08	0.129305	2.15e-09	2
b0691	ybfG	0.957802	0.669933	0.999176	0.993462	0.9239	0.43918	0
b0692	potE	0.915837	0.403452	1.00258	0.980094	0.734085	0.0124041	0
b0693	speF	0.951818	0.807014	1.42938	0.100708	0.612538	0.0328734	0
b0694	kdpE	0.904364	0.558303	0.356718	0.000120994	0.178729	1.64e-06	5
b0695	kdpD	0.781203	0.0224523	0.599035	0.000254892	0.174825	6.02e-09	5
b0696	kdpC	1.12489	0.0737756	0.927831	0.231419	0.510691	6.81e-07	0
b0697	kdpB	0.73601	0.00325909	0.954195	0.565088	0.394732	5.21e-07	5
b0698	kdpA	0.766089	0.0478269	0.659569	0.00572028	0.397425	1.82e-05	5
b0699	ybfA	0.498595	0.198784	1.028	0.957437	0.16931	0.00591316	5
b0700	rhsC	1.11679	0.631108	0.84736	0.474932	0.564115	0.028838	0
b0702	ybfB	0.945463	0.507331	0.859475	0.0939346	0.787944	0.0158442	0
b0703	ybfO	1.07457	0.690557	1.15032	0.443645	0.689132	0.0608535	0
b0704	ybfC	1.10998	0.0825935	1.00882	0.873821	0.910021	0.111718	0
b0705	ybfL	1.04461	0.638074	0.853719	0.110285	0.790686	0.0268104	0
b0706	ybfD	0.971669	0.823991	0.644753	0.006237	0.523839	0.000505856	0
b0707	ybgA	0.878111	0.505942	0.645169	0.0431973	0.0536354	4.26e-08	2
b0708	phr	0.884001	0.720181	0.420327	0.0277392	0.0483265	5.38e-06	2
b0709	dtpD	0.763784	0.156093	0.223935	8.90183e-06	0.0331661	5.33e-09	1
b0710	ybgI	1.09086	0.568441	0.140101	1.72582e-07	0.00965796	5.73e-11	1
b0711	ybgJ	0.924226	0.65074	0.167291	1.36625e-06	0.0186526	8.71e-10	1
b0712	ybgK	1.01959	0.753858	0.199778	2.65767e-10	0.0519113	8.37e-13	1
b0713	ybgL	0.887531	0.216916	0.175567	5.81918e-09	0.0402533	1.81e-11	1
b0714	nei	0.88751	0.580789	0.0924498	7.14458e-07	0.020702	8.24e-09	1
b0715	abrB	0.564615	0.0110134	0.100223	2.79642e-07	0.0750584	9.52e-08	1
b0716	ybgO	1.04142	0.591767	0.604999	5.49369e-05	0.414176	4.36e-07	5
b0717	ybgP	0.946977	0.664246	0.83205	0.163053	0.709475	0.0189184	0
b0718	ybgQ	0.798173	0.340934	1.09609	0.69233	0.54693	0.0238798	0
b0719	ybgD	0.897817	0.645194	1.20865	0.423694	0.674852	0.11495	0
b0720	gltA	1.30334	0.253743	0.628107	0.0601264	0.0326527	3.94e-08	1
b0721	sdhC	1.30107	0.617041	0.148008	0.00409695	0.0013564	2.25e-07	3
b0722	sdhD	1.29803	0.522174	0.165076	0.00112761	0.00178631	3.07e-08	3
b0723	sdhA	0.992703	0.985787	0.0506138	2.8338e-05	0.00240965	5.76e-08	3
b0724	sdhB	1.18782	0.381861	0.105128	4.53681e-07	0.0161293	1.71e-09	1
b0726	sucA	1.18462	0.698086	0.10264	0.000367957	0.00191238	6.84e-08	3
b0727	sucB	1.19909	0.702435	0.0691311	0.000209106	0.00216474	1.78e-07	3
b0728	sucC	1.26035	0.506199	0.14733	0.000231486	0.00255641	1.21e-08	3
b0729	sucD	1.11915	0.636176	0.0435157	1.45321e-07	0.00292912	4.53e-10	3
b0730	mngR	0.915053	0.399084	0.160979	1.0149e-08	0.0754571	3.94e-10	2
b0731	mngA	0.907303	0.404816	0.949249	0.651205	0.520207	0.000192859	0
b0732	mngB	0.879255	0.530752	0.280871	9.44783e-05	0.1529	3.62e-06	5
b0733	cydA	0.922178	0.734675	0.154767	1.50451e-05	0.0363085	9.32e-08	1
b0734	cydB	0.888975	0.760053	0.34166	0.0174964	0.225416	0.00285929	5
b0735	ybgE	0.965014	0.937364	0.259767	0.0128284	0.0448279	4.54e-05	1
b0736	ybgC	0.84331	0.00522808	0.209414	3.6814e-11	0.0216881	7.35e-15	1
b0737	tolQ	1.02193	0.903256	0.201458	4.66937e-06	0.00630557	1.2e-10	3
b0738	tolR	0.875268	0.74763	0.134639	0.000632611	0.0102107	7.19e-07	3
b0739	tolA	0.925333	0.767823	0.235671	0.000250311	0.0200038	4.92e-08	1
b0740	tolB	1.03668	0.865682	0.265548	9.72592e-05	0.013515	2.92e-09	1
b0741	pal	1.12853	0.370294	0.210457	4.14601e-07	0.0157434	4.57e-11	1
b0742	ybgF	1.08721	0.586734	0.155596	3.0975e-07	0.00860036	4.97e-11	1
b0750	nadA	0.93663	0.714515	0.180488	2.60419e-06	0.0258338	2.57e-09	1
b0751	pnuC	0.844051	0.598929	0.205128	0.000550848	0.0592765	5.39e-06	2
b0752	zitB	0.861077	0.508229	0.275374	0.00017591	0.11051	2.06e-06	2
b0753	ybgS	0.781156	0.0823501	4.48305	5.30651e-07	0.500635	0.000336842	6
b0754	aroG	1.17576	0.555838	0.100569	7.98995e-06	0.00341906	2.19e-09	3
b0755	gpmA	0.949557	0.612451	0.230783	6.58319e-08	0.00815726	9.33e-13	3
b0756	galM	0.858281	0.105808	0.121684	5.89104e-10	0.0101846	3.7e-13	3
b0757	galK	0.940075	0.87758	0.0594707	3.64064e-05	0.00894052	4.27e-07	3
b0758	galT	0.886772	0.608484	0.0866008	1.17925e-06	0.0134582	6.71e-09	1
b0759	galE	0.787104	0.14895	0.0600468	8.78377e-09	0.0167639	2.64e-10	1
b0760	modF	1.26001	0.160159	0.0516852	5.17391e-09	0.0148416	1.91e-10	1
b0761	modE	0.863395	0.398369	0.103932	1.43116e-07	0.0192545	8.18e-10	1
b0762	ybhT	0.845403	0.299572	0.196542	1.34162e-06	0.125376	1.49e-07	2
b0763	modA	0.74464	0.000311083	0.0393383	1.20914e-13	0.0142101	8.93e-15	1
b0764	modB	1.0325	0.898874	0.0258	6.22193e-08	0.00706112	3.74e-09	1
b0765	modC	0.871352	0.407225	0.0636639	1.56036e-08	0.0237139	8.92e-10	1
b0766	ybhA	0.811593	0.0211426	0.182442	1.39769e-09	0.0303141	1.54e-12	1
b0767	pgl	0.970194	0.88114	0.384188	0.000762355	0.154972	3.71e-06	5
b0768	ybhD	0.97003	0.640608	0.999159	0.989634	1.02754	0.676433	0
b0769	ybhH	0.948178	0.68215	1.16439	0.256183	0.896047	0.405073	0
b0770	ybhI	0.950403	0.694845	1.08899	0.514046	0.8536	0.238185	0
b0771	ybhJ	0.863758	0.539005	0.498157	0.0133143	0.227214	9.13e-05	5
b0772	ybhC	0.962057	0.933222	0.058563	0.000107958	0.0110922	2.27e-06	3
b0773	ybhB	0.734503	0.155328	0.674801	0.0789299	0.137059	2.42e-06	5
b0774	bioA	1.03579	0.932532	0.742883	0.480213	0.0430187	1.98e-05	2
b0775	bioB	1.36006	0.575628	0.646081	0.430459	0.0521749	0.000283166	2
b0776	bioF	1.08389	0.872463	0.52985	0.224056	0.0287946	3.5e-05	1
b0777	bioC	0.91492	0.849245	0.465238	0.125188	0.0566707	0.000108759	2
b0778	bioD	1.08052	0.817912	0.596168	0.146463	0.0427653	3.18e-06	2
b0779	uvrB	0.772156	0.0141123	0.368796	6.33242e-07	0.068523	6.57e-11	2
b0780	ybhK	1.02436	0.825395	0.160186	1.6311e-08	0.0435869	1.06e-10	1
b0781	moaA	0.666303	0.245407	0.157655	0.000259152	0.0549549	6.66e-06	1
b0782	moaB	0.766192	0.448869	0.195265	0.000775575	0.0709056	1.84e-05	2
b0783	moaC	0.69449	0.279475	0.160392	0.000219779	0.0190127	3.22e-07	1
b0784	moaD	0.724134	0.344295	0.135045	0.000128522	0.0223012	5.58e-07	1
b0785	moaE	0.767972	0.358004	0.310288	0.00179092	0.07568	3.79e-06	2
b0786	ybhL	0.665447	0.08548	0.88991	0.595437	0.193162	2.06e-05	5
b0787	ybhM	0.927535	0.659546	0.629778	0.0197995	0.331848	6.99e-05	5
b0788	ybhN	0.83111	0.177403	0.737467	0.0385954	0.142442	4.83e-08	5
b0789	ybhO	0.716193	0.124278	0.531774	0.0102532	0.0794867	2.56e-07	2
b0790	ybhP	0.76924	0.0873908	0.641939	0.00976987	0.0803758	9.45e-09	2
b0791	ybhQ	0.978088	0.934283	1.85322	0.0412831	0.302635	0.00116366	6
b0792	ybhR	0.975649	0.899875	0.631924	0.0380629	0.0673264	1.02e-07	2
b0793	ybhS	0.942509	0.707963	0.743451	0.0834761	0.0700401	1.57e-08	2
b0794	ybhF	0.885952	0.704808	0.457344	0.0312935	0.0172605	2.07e-07	1
b0795	ybhG	0.718395	0.178018	0.646424	0.0854685	0.0268852	3.48e-08	1
b0796	ybiH	0.748393	0.00247298	1.29731	0.00477047	0.185847	8.62e-10	5
b0797	rhlE	0.860387	0.549215	0.209059	8.95503e-05	0.00601626	2.49e-09	3
b0798	ybiA	0.8823	0.616853	0.299418	0.000637535	0.0890183	2.32e-06	2
b0799	dinG	0.814134	0.418471	0.126609	9.37645e-06	0.0206032	3.35e-08	1
b0800	ybiB	0.847615	0.461981	0.268305	0.000141007	0.100697	1.32e-06	2
b0801	ybiC	0.930187	0.728352	0.0391732	3.25749e-08	0.00468757	2.94e-10	3
b0802	ybiJ	0.913722	0.644385	0.150625	2.29598e-06	0.0374711	1.55e-08	1
b0803	ybiI	1.05211	0.55728	0.0726024	5.93317e-11	0.0335754	5.16e-12	1
b0804	ybiX	0.853666	0.570286	0.0323936	2.63264e-07	0.0128279	2.95e-08	1
b0805	fiu	1.22715	0.450331	0.0143598	2.73953e-08	0.00451207	2.91e-09	4
b0806	mcbA	0.825443	0.313804	2.16983	0.00175615	0.378396	0.000360937	6
b0807	rlmF	0.986331	0.893827	0.115688	2.12057e-09	0.0181091	6.07e-12	1
b0808	ybiO	0.682375	2.95223e-05	0.577783	1.3265e-06	0.315859	1.46e-09	5
b0809	glnQ	0.83084	0.210773	0.948163	0.708425	0.469611	0.00032128	5
b0810	glnP	0.88285	0.729388	1.90899	0.0956687	0.461423	0.0526741	0
b0811	glnH	0.746725	0.185389	0.261856	8.06317e-05	0.0253034	1.12e-08	1
b0812	dps	0.756787	0.124551	1.58505	0.0201692	0.273321	1.86e-05	6
b0813	rhtA	0.938481	0.782307	0.288528	0.000283665	0.15989	1.26e-05	5
b0814	ompX	0.62772	0.0127522	1.61498	0.0109847	0.29541	1.55e-05	6
b0815	ybiP	0.754631	0.106061	0.161783	6.39545e-07	0.0493007	6.41e-09	1
b0816	yliL	1.04198	0.916178	0.484156	0.0871263	0.298064	0.010378	0
b0817	mntR	0.966563	0.882996	0.140645	7.53781e-06	0.00977705	3.18e-09	3
b0818	ybiR	1.19088	0.0703945	0.292054	8.93226e-08	0.033506	6.6e-12	1
b0819	ybiS	0.799329	0.0327799	0.171361	4.88067e-09	0.0227959	3.67e-12	1
b0820	ybiT	0.960508	0.752708	0.217722	3.7053e-07	0.068413	2.02e-09	2
b0821	ybiU	0.891752	0.216353	0.280093	7.12742e-08	0.193362	6.7e-09	5
b0822	ybiV	0.742721	0.0257833	0.0985571	3.21281e-09	0.0641985	6.54e-10	2
b0823	ybiW	1.02319	0.849121	0.874275	0.279819	0.605441	0.00179603	0
b0824	ybiY	0.946302	0.732469	0.964451	0.822293	0.765205	0.12012	0
b0825	fsaA	1.1464	0.28726	0.328262	4.79263e-06	0.164779	6.42e-08	5
b0826	moeB	0.874654	0.357846	0.236502	1.6225e-06	0.040052	1.03e-09	1
b0827	moeA	0.933069	0.761077	0.183708	2.26568e-05	0.0490674	1.44e-07	1
b0828	iaaA	0.829581	0.358784	0.353631	0.000372278	0.023571	5.65e-09	1
b0829	gsiA	0.704928	0.180469	0.195166	6.30967e-05	0.0103108	6.98e-09	1
b0830	gsiB	0.947778	0.727422	0.186532	8.15035e-07	0.0120617	1.05e-10	1
b0831	gsiC	1.05644	0.817371	0.249374	0.000159024	0.00964126	4e-09	1
b0832	gsiD	1.13842	0.387084	0.312412	1.3606e-05	0.0143923	1.02e-10	1
b0833	yliE	0.998708	0.996328	0.166471	8.05945e-05	0.0977884	9.44e-06	2
b0834	yliF	0.936445	0.821248	0.237165	0.000545518	0.157254	8.12e-05	5
b0835	rimO	0.938769	0.762133	0.0610823	1.29219e-07	0.00793572	7.97e-10	3
b0836	bssR	0.457058	0.298637	4.91294	0.0506593	2.06123	0.334936	0
b0837	yliI	0.722373	0.262076	2.0774	0.0240129	0.0886113	6.42e-06	6
b0838	yliJ	0.946975	0.399392	0.152413	7.91989e-11	0.0505799	9.96e-13	1
b0839	dacC	0.793184	0.259097	0.957496	0.826767	0.210763	1.46e-05	5
b0840	deoR	0.857737	0.529303	0.699	0.160108	0.270562	0.000284942	5
b0841	ybjG	0.569528	0.0324558	1.22164	0.395737	0.0395494	8.94e-08	2
b0842	mdfA	0.904606	0.306094	0.286182	1.56418e-07	0.0549285	6.12e-11	2
b0843	ybjH	0.929479	0.443898	0.340335	5.38463e-07	0.113151	8.11e-10	2
b0844	ybjI	1.08184	0.510778	0.234711	2.94529e-07	0.0212814	3.28e-11	1
b0845	ybjJ	1.00518	0.986152	0.235152	0.000623842	0.0264887	3.07e-07	1
b0846	ybjK	1.01226	0.815831	0.289416	6.52378e-10	0.0651963	3.69e-13	2
b0847	ybjL	0.840848	0.27902	0.166178	4.9447e-07	0.0252795	6.53e-10	1
b0848	ybjM	0.497326	0.0816015	0.224725	0.00215595	0.168372	0.000651461	5
b0849	grxA	0.780604	0.379825	1.69628	0.0792244	0.455805	0.016014	0
b0850	ybjC	0.83601	0.554293	0.0849776	9.99129e-06	0.0257516	3.09e-07	1
b0851	nfsA	0.945119	0.814901	0.203836	6.09695e-05	0.00516105	1.4e-09	3
b0852	rimK	0.77146	0.0259561	0.198599	2.60443e-08	0.0492612	7.68e-11	1
b0853	ybjN	0.659037	0.00913162	0.247077	1.04823e-06	0.0509578	1e-09	1
b0854	potF	1.25676	0.453954	0.60785	0.121341	0.026606	3.4e-07	1
b0855	potG	1.03522	0.916544	0.302659	0.00434331	0.0713819	1.26e-05	2
b0856	potH	1.2084	0.529572	0.297367	0.0020924	0.0417447	1.03e-06	2
b0857	potI	0.96582	0.856415	0.208119	1.04586e-05	0.0369601	1.34e-08	1
b0858	ybjO	0.880855	0.354107	0.206862	4.21089e-07	0.0546983	1.49e-09	1
b0859	rumB	0.810249	0.00870996	0.157083	1.29253e-10	0.071153	4.43e-12	2
b0860	artJ	1.1213	0.694301	0.567948	0.0745079	0.00844867	1.99e-08	3
b0861	artM	0.994273	0.976171	0.287998	7.1748e-05	0.00511608	1.66e-10	3
b0862	artQ	1.10385	0.648818	0.351128	0.000637181	0.00245603	1.44e-10	3
b0863	artI	0.835216	0.415041	0.224277	4.33247e-05	0.00602897	6.96e-10	3
b0864	artP	0.898591	0.637859	0.263231	0.00014665	0.00396725	4.84e-10	3
b0865	ybjP	0.680494	0.00318219	0.372526	2.22918e-06	0.0736902	2.95e-10	2
b0866	ybjQ	0.767217	0.00355252	0.217868	1.63053e-09	0.0307312	6.57e-13	1
b0867	amiD	0.829322	0.0213212	0.265553	5.26742e-09	0.0500763	2.42e-12	2
b0868	ybjS	0.752504	0.00764893	0.195973	5.77713e-09	0.060194	3.43e-11	2
b0869	ybjT	0.911736	0.809494	0.151272	0.000564007	0.0213365	1.74e-06	1
b0870	ltaE	0.938997	0.597586	0.391957	1.3731e-05	0.0538563	4.49e-10	2
b0871	poxB	0.739792	0.289563	0.653271	0.145713	0.00965109	1.62e-08	3
b0872	hcr	0.419118	0.01159	0.404071	0.00932902	0.317102	0.00231625	5
b0873	hcp	0.596081	0.0873139	0.318845	0.0020002	0.147988	4.53e-05	5
b0874	ybjE	1.05474	0.620703	0.115984	3.03543e-09	0.0168157	7.25e-12	1
b0875	aqpZ	1.17104	0.485222	0.53909	0.0183027	0.226208	5.72e-05	5
b0876	ybjD	0.646942	0.00525487	0.184897	1.16281e-07	0.0876078	3.93e-09	2
b0877	ybjX	0.512458	0.00443525	0.509222	0.00419292	0.0325157	6.76e-09	1
b0878	macA	0.917471	0.308492	0.105547	1.7045e-10	0.0194383	8.36e-13	1
b0879	macB	0.990426	0.900693	0.139921	3.28224e-10	0.0312263	1.53e-12	1
b0880	cspD	0.995944	0.990813	2.14276	0.0522586	1.5875	0.210028	0
b0881	clpS	1.01805	0.887407	0.350876	9.21927e-06	0.0840589	3.88e-09	2
b0882	clpA	0.76266	0.186658	0.543458	0.0100248	0.435668	0.00158034	5
b0884	infA	0.891306	0.631676	0.186846	3.67126e-05	0.0126266	7.31e-09	1
b0885	aat	1.06597	0.84099	0.172944	0.000248631	0.0215239	3.4e-07	1
b0886	cydC	0.963472	0.89847	0.224619	0.000430712	0.0165072	8.37e-08	1
b0887	cydD	0.815142	0.467715	0.158345	5.82712e-05	0.0086869	1.39e-08	3
b0888	trxB	1.0062	0.988337	0.748128	0.498003	0.846663	0.695071	0
b0889	lrp	1.104	0.093751	0.158458	2.33331e-11	0.0411964	1.27e-13	1
b0890	ftsK	0.950507	0.713974	0.320691	9.74192e-06	0.01825	9.78e-11	1
b0891	lolA	0.924962	0.646579	0.287518	2.49617e-05	0.0136198	3.43e-10	1
b0892	rarA	0.872396	0.649904	0.131298	4.89333e-05	0.0125394	5.84e-08	1
b0893	serS	1.01056	0.944331	0.176795	5.16357e-07	0.024555	4.56e-10	1
b0894	dmsA	0.328462	0.219523	0.0730352	0.0121034	0.038746	0.00357689	1
b0895	dmsB	0.358372	0.224614	0.0687365	0.00738155	0.0521306	0.00418799	1
b0896	dmsC	0.491524	0.290958	0.197721	0.0298026	0.0900343	0.00385735	2
b0897	ycaC	0.57416	0.0305011	0.729794	0.181703	0.138039	5.44e-06	5
b0898	ycaD	1.00878	0.939035	0.351488	3.95709e-06	0.134142	1.07e-08	5
b0899	ycaM	0.81201	0.0330395	0.730562	0.00408344	0.613688	0.000197278	0
b0900	ycaN	1.09016	0.083437	0.982445	0.700418	0.852934	0.00556226	0
b0901	ycaK	0.601602	0.00406502	0.397959	5.88319e-05	0.233118	1.2e-06	5
b0902	pflA	0.775883	0.313459	0.337364	0.00118161	0.0962143	2.69e-06	2
b0903	pflB	1.053	0.75468	0.372138	0.000131099	0.0422439	4.74e-09	2
b0904	focA	0.691337	0.536065	0.192642	0.0176237	0.00315801	2.27e-06	3
b0905	ycaO	0.883516	0.698407	0.0559463	4.32726e-06	0.00551996	2.13e-08	3
b0906	ycaP	1.01116	0.921894	0.641641	0.00266589	0.0562507	3.4e-10	2
b0907	serC	1.27475	0.427947	0.197792	0.000298328	0.00413227	7.66e-09	3
b0908	aroA	1.21804	0.493678	0.106104	1.41726e-05	0.00198198	1.4e-09	3
b0909	ycaL	0.985271	0.876969	0.366134	1.19311e-06	0.232819	4.1e-08	5
b0910	cmk	0.875611	0.386482	0.306118	1.42748e-05	0.0231643	3.9e-10	1
b0911	rpsA	1.28876	0.000421432	0.994947	0.918308	1.15223	0.015359	0
b0912	ihfB	1.05042	0.639392	0.465077	2.59233e-05	0.19622	3.25e-08	5
b0913	ycaI	0.836944	0.0962655	0.620744	0.000672702	0.371336	1.82e-06	5
b0914	msbA	0.881129	0.69868	0.126097	8.26029e-05	0.0142571	1.67e-07	1
b0915	lpxK	0.913013	0.698012	0.165894	1.74897e-05	0.0222596	2.18e-08	1
b0916	ycaQ	0.942765	0.590972	0.219838	9.26391e-08	0.0541477	2.07e-10	1
b0917	ycaR	0.746504	0.262813	0.114482	6.81272e-06	0.0159707	2.05e-08	1
b0918	kdsB	0.768753	0.335098	0.108766	8.78722e-06	0.0157379	3.23e-08	1
b0919	ycbJ	0.627555	0.282841	0.0663242	7.32753e-05	0.0172	2.45e-06	1
b0920	ycbC	0.71589	0.0729454	0.216758	4.66677e-06	0.0616952	2.1e-08	2
b0921	smtA	1.03517	0.849061	0.134242	7.39839e-07	0.0105814	3.88e-10	3
b0922	mukF	0.866914	0.674022	0.0967892	4.23119e-05	0.0132954	2.01e-07	1
b0923	mukE	0.879777	0.455311	0.126613	3.01007e-07	0.0247183	1.38e-09	1
b0924	mukB	0.890524	0.272503	0.233586	7.59399e-08	0.0804193	4.53e-10	2
b0925	ycbB	0.879927	0.422543	1.42489	0.043968	0.115734	1.03e-07	5
b0926	ycbK	1.04276	0.834693	0.650414	0.0533806	0.0231159	5.77e-09	1
b0927	ycbL	1.11178	0.572756	0.61721	0.0248385	0.0405999	1.32e-08	2
b0928	aspC	1.29267	0.10326	0.240436	2.2894e-06	0.0215038	2.52e-10	1
b0929	ompF	1.31795	0.12971	0.0170234	6.24681e-10	0.00479175	4.85e-11	4
b0930	asnS	0.951153	0.793036	0.246076	2.52428e-05	0.0999092	3.34e-07	2
b0931	pncB	0.849989	0.611354	0.130609	7.77006e-05	0.00789144	4.03e-08	3
b0932	pepN	0.889095	0.737549	0.0901915	4.39423e-05	0.00978455	1.48e-07	3
b0933	ssuB	0.781424	0.000588125	0.50563	1.17438e-07	0.323712	1.1e-09	5
b0934	ssuC	0.80879	0.114868	0.472758	0.000136423	0.166243	7.3e-08	5
b0935	ssuD	0.892676	0.0668832	0.249616	4.60169e-10	0.14391	1.96e-11	5
b0936	ssuA	1.06671	0.483877	0.704782	0.00301121	0.372213	8.77e-07	5
b0937	ssuE	0.798799	0.0112999	0.473125	1.58567e-06	0.350392	7.56e-08	5
b0938	ycbQ	0.887922	0.131794	0.656339	0.000197225	0.671445	0.000299894	0
b0939	ycbR	1.024	0.943495	1.13168	0.712602	0.662682	0.236778	0
b0940	ycbS	0.940417	0.739757	0.420317	0.000796138	0.297738	6.37e-05	5
b0941	ycbT	0.833586	0.00424271	0.272126	2.77405e-10	0.21987	6.62e-11	5
b0942	ycbU	0.759899	0.36398	0.912875	0.758453	0.304137	0.00225046	5
b0943	ycbV	0.949151	0.425344	0.300882	6.15356e-09	0.170705	1.63e-10	5
b0944	ycbF	0.844112	0.0194808	0.42058	9.03386e-08	0.382923	3.51e-08	5
b0945	pyrD	0.888226	0.3554	0.0189962	4.31405e-11	0.00512379	2.88e-12	4
b0946	ycbW	0.814892	0.00894943	0.0869999	7.58314e-12	0.0470748	9e-13	1
b0947	ycbX	0.927293	0.808738	0.0729854	8.22951e-06	0.0149874	1.24e-07	1
b0948	rlmL	0.88373	0.395468	0.115335	4.27427e-08	0.00735709	1.93e-11	3
b0949	uup	0.944869	0.78061	0.0930224	4.53313e-07	0.0151299	2.42e-09	1
b0950	pqiA	0.852957	0.304675	0.302895	1.3432e-05	0.0238856	4.28e-10	1
b0951	pqiB	1.11483	0.409871	0.313852	4.79509e-06	0.0310608	2.06e-10	1
b0952	ymbA	0.594879	3.22498e-05	0.378745	1.3556e-07	0.186772	8.46e-10	5
b0953	rmf	0.912193	0.808986	4.67444	0.00212245	5.47418	0.00111217	6
b0954	fabA	0.808886	0.613178	0.371995	0.0361451	0.359695	0.031447	0
b0955	ycbZ	0.815303	0.414973	0.154766	1.96126e-05	0.0069545	2.95e-09	3
b0956	matP	0.925247	0.342768	0.338381	1.17645e-07	0.0854464	5.58e-11	2
b0957	ompA	1.35378	0.02103	0.991017	0.936199	3.22305	1.31e-06	6
b0958	sulA	0.934335	0.6636	0.812256	0.200856	0.0110005	9.73e-11	3
b0959	sxy	0.985401	0.92244	0.103289	4.58089e-08	0.0357199	1.29e-09	1
b0960	yccS	0.754179	0.200953	0.173939	9.21348e-06	0.0316451	2.08e-08	1
b0961	yccF	0.975871	0.950504	0.0945209	0.000131366	0.0127659	7.3e-07	1
b0962	helD	0.962406	0.821457	0.192329	2.33354e-06	0.0239074	1.32e-09	1
b0963	mgsA	0.731687	0.0196506	0.175163	4.12618e-08	0.0465111	2.09e-10	1
b0964	yccT	0.773304	0.00479432	0.471664	1.28281e-06	0.296955	1.63e-08	5
b0965	yccU	0.805495	0.374135	0.414067	0.00378871	0.0850425	1.34e-06	2
b0966	hspQ	0.885145	0.61286	1.23427	0.389075	0.55109	0.0296372	0
b0967	rlmI	1.01174	0.892189	0.142314	1.00648e-09	0.0174833	1.01e-12	1
b0968	yccX	0.820717	0.0761806	0.738285	0.012828	0.240857	9.06e-08	5
b0969	yccK	0.883003	0.514955	0.759332	0.166911	0.0381687	1.26e-08	2
b0970	yccA	0.982288	0.768271	1.23989	0.00484121	1.1105	0.107215	0
b0972	hyaA	0.763928	0.120891	0.120149	1.66846e-07	0.00971518	1.14e-10	3
b0973	hyaB	0.644641	0.0893444	0.122423	5.49319e-06	0.0299265	5.55e-08	1
b0974	hyaC	0.807216	0.440015	0.122855	1.76022e-05	0.013063	2.73e-08	1
b0975	hyaD	0.750061	0.103187	0.127055	2.31417e-07	0.0274588	1.36e-09	1
b0976	hyaE	0.85222	0.229463	0.180687	1.32969e-07	0.0842095	4.4e-09	2
b0977	hyaF	0.756812	0.0677036	0.143997	9.049e-08	0.035232	5.63e-10	1
b0978	appC	0.677125	0.023179	0.271164	5.52384e-06	0.0637146	6.44e-09	2
b0979	appB	0.89556	0.300311	0.300314	4.72637e-07	0.0458293	7.56e-11	2
b0980	appA	0.753071	0.008426	0.46857	6.68697e-06	0.139294	1.12e-09	5
b0981	etk	1.036	0.779684	0.536105	0.000559491	0.316761	4.11e-06	5
b0982	etp	1.02347	0.84275	0.633928	0.00274491	0.449694	4.6e-05	5
b0983	gfcE	1.03028	0.789578	0.317598	1.42841e-06	0.258481	3.26e-07	5
b0984	gfcD	1.24631	0.0416105	0.374902	1.51388e-06	0.249769	6.64e-08	5
b0985	gfcC	1.30586	0.000540409	0.431843	3.21543e-08	0.326881	2.24e-09	5
b0986	gfcB	0.879631	0.0260328	0.628813	3.52772e-06	0.623336	3e-06	0
b0987	gfcA	1.01647	0.753016	0.288083	5.77964e-10	0.19779	4.79e-11	5
b0988	insB	0.75417	0.188267	0.278555	9.43643e-05	0.164647	5.41e-06	5
b0989	cspH	0.722703	0.466096	1.04791	0.915151	0.574627	0.225736	0
b0990	cspG	0.792355	0.393226	0.112752	1.05145e-05	0.00509069	3.62e-09	3
b0991	ymcE	0.822202	0.65243	0.104499	0.000372585	0.0225285	5.7e-06	1
b0992	yccM	0.745775	0.147911	0.156309	2.37098e-06	0.101028	3.61e-07	2
b0993	torS	0.868757	0.0217128	0.0939563	1.57252e-12	0.051708	1.85e-13	1
b0994	torT	1.02574	0.604811	0.160147	8.46898e-12	0.0471567	6.56e-14	1
b0995	torR	0.850489	0.0955789	0.287658	9.648e-08	0.107363	4.26e-10	2
b0996	torC	1.08842	0.489311	1.20784	0.141546	0.822869	0.130448	0
b0997	torA	0.934451	0.247525	0.55137	1.14593e-06	0.483194	1.89e-07	5
b0998	torD	0.954771	0.472032	0.808862	0.00687088	0.642548	3.94e-05	0
b0999	cbpM	0.907178	0.653511	0.179403	1.30795e-05	0.0307704	2.39e-08	1
b1000	cbpA	0.823895	0.535905	0.159423	0.000143159	0.039708	1.27e-06	1
b1001	yccE	1.03446	0.835928	1.19847	0.283065	1.08024	0.638627	0
b1002	agp	0.898191	0.610833	0.218744	2.84292e-05	0.0623177	1.46e-07	2
b1003	yccJ	0.520695	0.150857	1.20069	0.671334	0.392391	0.0503251	0
b1004	wrbA	0.583272	0.203182	1.20012	0.654209	0.634621	0.277193	0
b1006	rutG	0.883576	0.024299	0.25407	1.04237e-10	0.149468	4.7e-12	5
b1007	rutF	0.967993	0.852209	0.705091	0.0681575	0.477249	0.00160557	5
b1008	rutE	0.869191	0.0868179	0.935187	0.384107	0.773947	0.00626362	0
b1009	rutD	0.801813	0.00538354	0.797551	0.00468292	0.63789	3.38e-05	0
b1010	rutC	0.938425	0.606795	1.29763	0.0553696	0.763248	0.0484016	0
b1011	rutB	0.94477	0.543759	0.848463	0.100059	0.757413	0.0123031	0
b1012	rutA	1.00185	0.981595	1.36839	0.00265647	0.63285	0.00018857	0
b1013	rutR	0.905246	0.373237	0.641369	0.0021299	0.137392	8.02e-09	5
b1014	putA	0.932462	0.765038	0.149991	1.09633e-05	0.0739605	6.88e-07	2
b1015	putP	1.26226	0.214312	0.0815868	9.12857e-08	0.008848	2.47e-10	3
b1018	efeO	1.08307	0.74416	0.0133124	1.00288e-08	0.0037511	9.06e-10	4
b1019	efeB	0.951725	0.872882	0.0258154	4.05981e-07	0.0135078	9.23e-08	1
b1020	phoH	1.51704	0.316492	0.484668	0.0974809	0.280686	0.00969209	0
b1021	pgaD	1.20337	0.0532031	0.465082	5.11603e-06	0.35535	3.56e-07	5
b1022	pgaC	1.32606	0.238078	0.158724	1.2588e-05	0.102408	1.99e-06	2
b1023	pgaB	1.35689	0.336232	0.238434	0.000879688	0.142673	8.97e-05	2
b1024	pgaA	1.18652	0.407403	0.116377	1.07089e-06	0.0864861	3.36e-07	2
b1025	ycdT	1.31295	0.100977	0.0653715	1.00237e-08	0.0531998	5.09e-09	1
b1028	ymdE	0.932731	0.264825	0.984669	0.798269	0.860607	0.0296808	0
b1029	ycdU	0.952424	0.60562	1.17777	0.104809	0.903328	0.292718	0
b1033	ghrA	0.907861	0.70499	0.107749	5.77849e-06	0.00423364	1.65e-09	3
b1034	ycdX	1.00754	0.975382	0.14836	1.48513e-05	0.00528858	1.61e-09	3
b1035	ycdY	0.866014	0.507673	0.0853988	5.38257e-07	0.0166009	4.97e-09	1
b1036	ycdZ	0.79795	0.00512169	0.209574	5.07608e-10	0.0279844	1.99e-13	1
b1037	csgG	0.823751	0.220293	0.345544	3.79696e-05	0.132651	1.39e-07	5
b1038	csgF	0.923489	0.342697	0.278454	3.21188e-08	0.273476	2.82e-08	5
b1039	csgE	0.991451	0.934253	0.0924058	9.14318e-10	0.075933	4.34e-10	2
b1040	csgD	0.99289	0.886851	0.219484	6.58406e-11	0.194856	3.22e-11	5
b1041	csgB	0.939538	0.686926	1.13908	0.406871	0.920703	0.594638	0
b1042	csgA	0.901228	0.0429197	0.495319	3.75591e-08	0.42544	6.1e-09	5
b1043	csgC	0.98466	0.744723	0.999894	0.998215	0.866807	0.0118893	0
b1044	ymdA	1.49043	0.0728931	0.109913	8.73994e-07	0.0535366	6.79e-08	1
b1045	ymdB	1.13221	0.158308	0.119651	3.31186e-10	0.0184984	8.41e-13	1
b1046	ymdC	0.977445	0.775063	0.186804	1.99461e-09	0.053175	1.02e-11	1
b1047	opgC	0.807986	0.340745	0.126852	2.96625e-06	0.043531	6.98e-08	1
b1048	opgG	1.09824	0.733515	0.12269	1.83485e-05	0.00305221	1.95e-09	3
b1049	opgH	0.863659	0.550218	0.154385	1.75032e-05	0.0267102	4.94e-08	1
b1050	yceK	0.82046	0.392142	0.458527	0.00584	0.0514952	1.63e-07	2
b1051	msyB	0.916884	0.751315	0.550129	0.0496892	0.0539656	1.01e-06	2
b1053	mdtG	0.893681	0.434266	0.249219	2.12055e-06	0.068744	5.38e-09	2
b1054	lpxL	0.907782	0.756528	0.597005	0.121187	0.158514	0.00014535	5
b1055	yceA	0.845388	0.508745	0.262687	0.000324929	0.0967283	3.44e-06	2
b1056	yceI	0.852819	0.179932	0.29769	9.76647e-07	0.209329	9.74e-08	5
b1057	yceJ	1.15906	0.120669	0.498554	1.50798e-05	0.27581	6.45e-08	5
b1058	yceO	1.06552	0.678932	0.489931	0.000827189	0.433367	0.000261741	5
b1059	solA	0.961564	0.613049	0.0630848	1.30176e-11	0.0191292	4.3e-13	1
b1060	bssS	0.694413	0.54963	3.76511	0.0490063	2.47544	0.155664	0
b1061	dinI	0.894144	0.448839	0.110018	4.19674e-08	0.0662169	6.16e-09	2
b1062	pyrC	1.00911	0.96448	0.0174391	3.40576e-09	0.00483934	2.57e-10	4
b1063	yceB	0.690304	0.0148803	0.259714	1.17627e-06	0.0429366	4.76e-10	1
b1064	grxB	0.867797	0.733257	0.223682	0.00440584	0.0118499	1.01e-06	1
b1065	mdtH	1.10211	0.110653	0.175961	5.89749e-11	0.0756708	1.38e-12	2
b1066	rimJ	0.944276	0.884923	0.0731712	6.11082e-05	0.00846922	3.44e-07	3
b1067	yceH	0.877401	0.502449	0.103039	4.17023e-07	0.0105254	6.75e-10	3
b1068	yceM	0.764256	0.0412648	0.174218	4.88798e-08	0.0395149	1.57e-10	1
b1069	murJ	0.830077	0.0219641	0.312554	1.80909e-08	0.0670539	6.51e-12	2
b1070	flgN	0.876008	0.0653508	0.00712274	1.07618e-14	0.00284731	2.13e-15	4
b1071	flgM	1.1866	0.19022	0.0139545	2.00627e-11	0.00355043	1.44e-12	4
b1072	flgA	1.16613	0.237831	0.0062453	4.13461e-12	0.00310264	1.21e-12	4
b1073	flgB	1.2181	0.0438486	0.00258828	2.89157e-14	0.00190418	1.79e-14	4
b1074	flgC	1.32075	0.203815	0.00344241	1.86813e-10	0.00134796	4.4e-11	4
b1075	flgD	1.24198	0.156899	0.00387368	6.95689e-12	0.00168073	1.84e-12	4
b1076	flgE	1.26952	0.0857257	0.00231649	9.19557e-13	0.00137433	4.19e-13	4
b1077	flgF	1.1621	0.420369	0.00372362	6.02824e-11	0.00153683	1.5e-11	4
b1078	flgG	1.17947	0.0402454	0.00418084	9.55521e-15	0.00164636	2.14e-15	4
b1079	flgH	1.22496	0.0150972	0.00357817	6.43021e-15	0.0023844	3.31e-15	4
b1080	flgI	1.31695	0.0495039	0.00444279	2.30141e-12	0.00277252	1.04e-12	4
b1081	flgJ	1.26508	0.088831	0.00993182	1.20498e-11	0.00237698	9.28e-13	4
b1082	flgK	1.14897	0.0134219	0.00385821	1.5723e-16	0.00131496	2.91e-17	4
b1083	flgL	1.02739	0.742415	0.00660012	8.12876e-14	0.00245511	1.47e-14	4
b1084	rne	0.899016	0.568717	0.192338	5.0171e-06	0.0121586	6.28e-10	1
b1085	yceQ	1.06602	0.687076	0.898485	0.503382	0.141457	2.7e-07	5
b1086	rluC	0.828821	0.139785	0.104149	5.47783e-09	0.0307294	9.5e-11	1
b1087	yceF	0.774854	0.328434	0.570209	0.0479185	0.128849	1.18e-05	2
b1088	yceD	1.11639	0.593663	0.263104	6.76584e-05	0.013498	2.03e-09	1
b1089	rpmF	0.856265	0.322425	0.0978543	4.07217e-08	0.00404191	1.24e-11	3
b1090	plsX	1.07863	0.774892	0.185754	8.11449e-05	0.00604134	4.41e-09	3
b1091	fabH	0.897177	0.550648	0.197373	4.52054e-06	0.0258651	2.82e-09	1
b1092	fabD	1.14999	0.582682	0.230744	0.000166791	0.0353453	1.46e-07	1
b1093	fabG	0.823595	0.154966	0.109787	1.37235e-08	0.00894461	1.1e-11	3
b1094	acpP	1.28074	0.00245293	0.640652	3.21522e-05	0.23094	7.07e-10	5
b1095	fabF	0.967342	0.773823	0.238892	2.62212e-07	0.0948755	2.65e-09	2
b1096	pabC	0.906595	0.431401	0.247171	5.64574e-07	0.0549119	6.63e-10	2
b1097	yceG	0.820831	0.268215	0.318535	5.87744e-05	0.0515516	1.32e-08	2
b1098	tmk	0.939339	0.489121	0.257125	4.11043e-08	0.0271447	4.26e-12	1
b1099	holB	0.813456	0.0134874	0.22904	2.02481e-09	0.0485344	2.27e-12	2
b1100	ycfH	0.921009	0.645066	0.284564	3.48817e-05	0.0408328	8.61e-09	2
b1101	ptsG	1.08932	0.738608	0.0707721	1.33128e-06	0.00545744	2.71e-09	3
b1102	fhuE	1.01865	0.944791	0.102011	7.08778e-06	0.00488647	3.33e-09	3
b1103	hinT	0.820053	0.292626	0.0834877	1.16293e-07	0.0203735	1.8e-09	1
b1104	ycfL	1.14945	0.50724	0.168948	6.9873e-06	0.0138955	2.45e-09	1
b1105	ycfM	0.858556	0.232001	0.175209	7.7258e-08	0.0189891	3.53e-11	1
b1106	thiK	0.950749	0.751295	0.19003	1.23492e-06	0.0200809	4.66e-10	1
b1107	nagZ	1.07816	0.742265	0.174655	1.83276e-05	0.00927398	2.55e-09	1
b1108	ycfP	0.966171	0.865602	0.15807	4.24069e-06	0.00752583	5.71e-10	3
b1109	ndh	0.846555	0.521297	1.06615	0.80337	0.263486	0.000389617	5
b1110	ycfJ	0.820491	0.30708	1.54715	0.0397289	0.142119	1.33e-06	5
b1111	ycfQ	0.878691	0.115861	0.464574	1.84077e-06	0.0162234	2.85e-13	1
b1112	bhsA	1.33543	0.371387	111.853	4.96682e-08	94.2205	6.98e-08	6
b1113	ycfS	1.06187	0.859705	7.02199	0.000182975	0.429533	0.0295493	6
b1114	mfd	1.00511	0.987788	0.119502	8.10768e-05	0.0181702	3.51e-07	1
b1115	ycfT	0.97521	0.826119	0.872377	0.248834	0.654523	0.0037185	0
b1116	lolC	0.816916	0.481088	0.136942	3.7153e-05	0.0103385	2.37e-08	3
b1117	lolD	0.908275	0.705086	0.197038	7.71387e-05	0.0140038	1.59e-08	1
b1118	lolE	0.937876	0.883692	0.137048	0.00102002	0.00803845	7.76e-07	3
b1119	nagK	0.932667	0.784169	0.159976	2.97101e-05	0.00577581	2.83e-09	3
b1120	cobB	0.848132	0.450307	0.129427	2.80988e-06	0.0224158	1.02e-08	1
b1121	ycfZ	0.98858	0.968719	0.115321	2.47987e-05	0.147941	6.74e-05	2
b1122	ymfA	1.18224	0.369903	0.0914071	1.61458e-07	0.0575407	3.19e-08	1
b1123	potD	0.915172	0.754973	0.0819077	5.38087e-06	0.00636129	9.33e-09	3
b1124	potC	0.952754	0.853996	0.0748381	2.05113e-06	0.00501484	3.01e-09	3
b1125	potB	0.988186	0.970232	0.0534912	3.79774e-06	0.00424912	1.36e-08	3
b1126	potA	0.782439	0.368874	0.0395418	3.32519e-07	0.00697723	6.39e-09	3
b1127	pepT	0.541069	0.182774	0.194428	0.00361246	0.0801109	0.000180924	2
b1128	ycfD	0.800194	0.082219	0.241638	3.43506e-07	0.0470267	2.81e-10	2
b1129	phoQ	0.743407	0.262125	0.674495	0.146	0.00760086	4.96e-09	3
b1130	phoP	0.938939	0.839485	0.770585	0.410367	0.0038398	9.1e-09	3
b1131	purB	0.997457	0.989627	0.0353334	1.41514e-08	0.00403406	1.3e-10	3
b1132	hflD	1.06146	0.706689	0.126397	1.617e-07	0.00391829	1.61e-11	3
b1133	mnmA	1.04557	0.842446	0.144696	6.56673e-06	0.00230454	1.85e-10	3
b1134	nudJ	0.804343	0.323208	0.11931	1.97352e-06	0.0107284	1.93e-09	3
b1135	rluE	0.815492	0.365928	0.113188	2.03017e-06	0.00763857	1.27e-09	3
b1136	icd	1.32196	0.00344506	0.44448	8.30319e-07	0.359225	1.01e-07	5
b1137	ymfD	1.00446	0.980237	0.314412	7.52758e-05	0.304524	6.05e-05	5
b1138	ymfE	0.987225	0.888381	0.452176	6.32556e-06	0.404895	2.04e-06	5
b1139	lit	0.805166	0.24604	0.377916	0.000289226	0.348019	0.000155947	5
b1140	intE	0.909863	0.876799	3.02402	0.0931143	2.72593	0.123273	0
b1141	xisE	0.938717	0.918328	4.44358	0.0334252	3.37224	0.0718936	0
b1143	ymfI	0.816559	0.543929	0.334739	0.00725795	0.282083	0.00308833	5
b1144	ymfJ	0.73189	0.300425	2.77038	0.00544814	0.689964	0.22352	6
b1145	cohE	0.600358	0.000353263	0.233793	4.70218e-08	0.0835627	3.19e-10	2
b1146	croE	0.971722	0.798385	1.08496	0.473235	0.718379	0.0133735	0
b1147	ymfL	0.674336	0.000424431	0.467629	1.98734e-06	0.329181	6.49e-08	5
b1148	ymfM	0.681428	0.127429	0.695751	0.146874	0.261998	0.000199368	5
b1150	ymfR	0.901614	0.837654	1.54668	0.397062	0.682448	0.456112	0
b1151	beeE	0.738489	0.410446	1.47813	0.294333	0.481088	0.0657685	0
b1152	jayE	0.865674	0.0440987	0.89884	0.11881	0.676975	0.000113793	0
b1153	ymfQ	1.09545	0.380832	1.19872	0.0991363	0.939955	0.547209	0
b1154	stfP	0.82471	0.272083	1.09565	0.593313	0.767169	0.141475	0
b1155	tfaP	0.973469	0.568467	0.956301	0.350564	0.935996	0.178318	0
b1156	tfaE	1.01156	0.809552	0.970706	0.536547	0.914627	0.0846262	0
b1157	stfE	1.00098	0.990767	1.09613	0.294612	0.912074	0.293389	0
b1158	pinE	1.43798	0.0825183	1.5956	0.0327554	1.04151	0.832638	0
b1159	mcrA	1.04418	0.697108	0.556722	0.000337823	0.540424	0.000233264	0
b1160	iraM	0.909129	0.723903	2.40156	0.00790792	0.899168	0.693752	0
b1161	ycgX	0.880664	0.616013	0.502469	0.0193789	0.335595	0.00137845	5
b1162	ycgE	1.36216	0.298051	0.295197	0.0016247	0.00661857	1.18e-08	3
b1163	ycgF	2.0608	0.286517	0.202832	0.0329963	0.00957054	3.51e-05	1
b1164	ycgZ	1.47549	0.0828142	1.71757	0.023435	1.02047	0.921696	0
b1165	ymgA	1.13959	0.35013	1.67205	0.00342152	1.01203	0.930198	0
b1166	ariR	1.0145	0.930473	2.32869	0.000430151	1.12842	0.47035	6
b1167	ymgC	1.10451	0.443292	1.37703	0.0286757	1.16633	0.245319	0
b1168	ycgG	1.05428	0.550645	1.23204	0.0358116	1.08543	0.361087	0
b1171	ymgD	1.01431	0.90378	0.210648	1.44813e-07	0.106971	5.16e-09	2
b1172	ymgG	0.94592	0.566127	0.250566	6.74825e-08	0.145776	3.16e-09	5
b1174	minE	0.996228	0.985896	0.0949213	7.7275e-07	0.0426055	5.42e-08	1
b1175	minD	0.983497	0.964947	0.0760778	4.80856e-05	0.00495709	8.72e-08	3
b1176	minC	1.20119	0.62854	0.128591	0.000273189	0.00478751	7.8e-08	3
b1177	ycgJ	1.00139	0.992131	0.267671	3.16432e-06	0.0808592	9.02e-09	2
b1178	ycgK	0.976818	0.890751	0.349325	0.000106014	0.0501013	1.1e-08	2
b1179	ycgL	0.877843	0.11246	0.257588	9.95022e-09	0.114717	1.24e-10	2
b1180	ycgM	0.956222	0.780798	0.205772	2.08294e-06	0.0520329	7e-09	1
b1181	ycgN	0.689099	0.126253	0.261341	0.000152396	0.121009	3.58e-06	2
b1182	hlyE	0.869891	0.125447	0.82108	0.0400565	0.580503	8.02e-05	0
b1183	umuD	0.950966	0.290378	0.647331	3.04226e-06	0.202105	1.81e-11	5
b1184	umuC	0.878186	0.13906	0.664212	0.000549929	0.187789	2.89e-09	5
b1185	dsbB	0.805929	0.0942368	0.0871409	2.6021e-09	0.029357	8.1e-11	1
b1186	nhaB	0.90207	0.227458	0.0450989	8.0255e-12	0.0105183	2.07e-13	1
b1187	fadR	0.786965	0.00317469	0.163019	1.03009e-10	0.0253692	1.27e-13	1
b1188	ycgB	0.95116	0.810754	1.77587	0.0188588	0.0859308	4.31e-07	6
b1189	dadA	0.783733	0.359588	0.373936	0.00331492	0.177821	5.82e-05	5
b1190	dadX	0.70431	0.254664	0.369131	0.00671551	0.149006	7.74e-05	5
b1191	cvrA	0.923553	0.636133	0.127233	2.77787e-07	0.0159383	4.34e-10	1
b1192	ldcA	0.919954	0.680387	0.105998	7.02136e-07	0.0203956	4.5e-09	1
b1193	emtA	0.904614	0.346939	0.258753	1.73629e-07	0.041634	5.99e-11	1
b1194	ycgR	0.963437	0.862777	0.0270754	1.677e-08	0.0171004	5.5e-09	1
b1195	ymgE	0.958918	0.919011	4.03578	0.00643188	1.64623	0.244385	6
b1196	ycgY	0.898854	0.322558	0.902788	0.341769	0.794548	0.0494037	0
b1197	treA	0.878379	0.192784	0.390986	2.01473e-06	0.0267718	7.39e-12	1
b1198	dhaM	0.720257	0.24812	0.0765996	3.18692e-06	0.00309566	1.96e-09	3
b1199	dhaL	0.637333	0.258346	0.0378568	7.40915e-06	0.00412888	7.39e-08	3
b1200	dhaK	0.564521	0.0471071	0.0415305	2.75982e-07	0.00566879	3.12e-09	3
b1201	dhaR	0.932719	0.135999	0.292073	1.35642e-10	0.0778072	1.33e-13	2
b1202	ycgV	0.63387	0.086045	0.314753	0.000764884	0.179781	3.73e-05	5
b1203	ychF	0.902624	0.496952	0.119849	7.50755e-08	0.00638487	2.22e-11	3
b1204	pth	0.870717	0.174237	0.121636	1.46593e-09	0.0371038	2.16e-11	1
b1205	ychH	0.831482	0.702157	1.08239	0.869259	0.669183	0.411991	0
b1206	ychM	0.879428	0.720951	0.269034	0.00404448	0.280704	0.00491571	5
b1207	prs	0.761953	0.294859	0.0564715	5.61344e-07	0.00705255	3.77e-09	3
b1208	ispE	1.05381	0.724629	0.145777	1.74759e-07	0.00527984	1.5e-11	3
b1209	lolB	0.894461	0.715778	0.0670205	5.26472e-06	0.00874064	3.4e-08	3
b1210	hemA	1.08724	0.822582	0.15394	0.000496678	0.00894194	2.2e-07	1
b1211	prfA	0.909481	0.848479	0.0848805	0.000534993	0.0041282	7.41e-07	3
b1212	prmC	0.836631	0.448832	0.122249	4.29676e-06	0.0095643	3.15e-09	3
b1213	ychQ	1.00366	0.993268	0.105779	0.000393348	0.00918793	9e-07	3
b1214	ychA	1.0101	0.957496	0.166958	2.86523e-06	0.00665901	2.23e-10	3
b1215	kdsA	0.836853	0.253017	0.194301	8.4697e-07	0.0917778	2.74e-08	2
b1216	chaA	0.817075	0.321037	3.04344	0.000216785	0.150451	2.7e-06	6
b1217	chaB	0.770861	0.138271	0.766965	0.131596	0.0574057	1.25e-08	2
b1218	chaC	0.894174	0.611114	0.576855	0.0281336	0.0448308	7.66e-08	2
b1219	ychN	0.745696	0.0124863	0.113491	1.22894e-09	0.0329947	1.77e-11	1
b1220	ychO	1.01962	0.760631	0.458687	2.96137e-07	0.067567	2.71e-12	2
b1221	narL	0.8137	0.464975	0.0535425	1.15515e-06	0.00730241	1.01e-08	3
b1222	narX	0.688068	0.216589	0.125432	3.17535e-05	0.0213403	1.44e-07	1
b1223	narK	0.479987	0.244692	0.0027968	2.43804e-06	0.00213108	1.64e-06	4
b1224	narG	0.620485	0.52727	0.00723286	6.13531e-05	0.00443324	2.84e-05	4
b1225	narH	0.926249	0.91191	0.014437	0.000111654	0.0112716	7.12e-05	1
b1226	narJ	0.856518	0.818805	0.0399677	0.000719548	0.0381603	0.000650462	1
b1227	narI	1.06984	0.899894	0.124268	0.00280852	0.0836809	0.000892509	2
b1229	tpr	0.974684	0.840932	0.972261	0.825764	0.619072	0.00346433	0
b1232	purU	1.03872	0.858785	0.0644682	1.92392e-07	0.00473903	3.86e-10	3
b1233	ychJ	0.982502	0.951898	0.0458878	1.15233e-06	0.00448465	6.77e-09	3
b1234	rssA	1.01118	0.974617	0.146053	0.000253163	0.00938287	1.35e-07	1
b1235	rssB	0.903356	0.550858	0.152312	6.9138e-07	0.0181212	6.41e-10	1
b1236	galU	0.849862	0.288058	0.0876192	2.04722e-08	0.0180658	1.9e-10	1
b1237	hns	1.07882	0.452691	0.172043	1.01486e-08	0.0107172	1.35e-12	1
b1238	tdk	0.857306	0.0621039	0.180329	9.11487e-10	0.0698896	1.42e-11	2
b1241	adhE	0.710904	0.348572	0.226941	0.00178091	0.00691174	8.8e-08	3
b1242	ychE	0.706656	0.121228	0.245119	5.37481e-05	0.138896	3.07e-06	2
b1243	oppA	1.19277	0.198482	0.280611	2.37054e-06	0.00406804	2.92e-12	3
b1244	oppB	1.06085	0.754774	0.173187	3.45403e-06	0.00261021	4.45e-11	3
b1245	oppC	0.998764	0.994361	0.134517	5.40459e-07	0.00284762	2.52e-11	3
b1246	oppD	0.902251	0.670387	0.176293	2.96653e-05	0.00303318	5.61e-10	3
b1247	oppF	0.92327	0.52354	0.205027	1.9891e-07	0.00703927	4.62e-12	3
b1248	yciU	0.781193	0.0238671	0.174044	6.66927e-09	0.0531775	5.14e-11	1
b1249	cls	0.73829	0.0560699	0.144839	1.23972e-07	0.0209244	1.94e-10	1
b1250	kch	0.863777	0.448556	0.213429	1.10648e-05	0.0986277	3.13e-07	2
b1251	yciI	0.869511	0.0502602	0.10476	1.56959e-11	0.0677488	2.94e-12	2
b1252	tonB	0.596538	0.00320474	0.107889	2.04909e-08	0.00600823	8.25e-12	3
b1253	yciA	0.969424	0.708146	0.296956	5.65443e-08	0.0596335	2.11e-11	2
b1254	yciB	0.963774	0.822064	0.419793	0.000336474	0.0553882	1.03e-08	2
b1255	yciC	0.869304	0.525253	0.204205	2.74408e-05	0.0177997	6.78e-09	1
b1256	ompW	0.19698	0.0685496	0.0234024	0.000896155	0.0210534	0.000738097	1
b1257	yciE	0.477407	0.0757801	0.432585	0.0488001	0.173036	0.000920887	5
b1258	yciF	0.947284	0.854556	1.719	0.0903525	0.22947	0.000523327	6
b1259	yciG	0.915125	0.29902	1.55252	0.000332432	0.437061	1.85e-06	6
b1260	trpA	0.884748	0.12798	0.197648	1.64526e-09	0.0382195	2.21e-12	1
b1261	trpB	1.16074	0.148119	0.325211	5.04003e-07	0.0269822	9.42e-12	1
b1262	trpC	1.0557	0.715164	0.225295	1.71098e-06	0.00410463	9.45e-12	3
b1263	trpD	0.915235	0.342413	0.205207	1.18324e-08	0.00657142	2.18e-13	3
b1264	trpE	0.85966	0.475995	0.161474	6.04011e-06	0.00712269	6.77e-10	3
b1265	trpL	0.849193	0.757369	0.210556	0.0133392	0.0713187	0.000510996	2
b1266	yciV	0.72801	0.00305204	0.116164	2.74314e-10	0.0139625	4.15e-13	1
b1267	yciO	0.815041	0.0195431	0.182099	9.74048e-10	0.0133942	1.47e-13	1
b1268	yciQ	1.04204	0.831868	0.296728	9.2324e-05	0.0510137	3.76e-08	2
b1269	rluB	0.671578	0.00296802	0.070756	3.15154e-10	0.00547982	5.21e-13	3
b1270	btuR	0.91646	0.591703	0.145321	3.70706e-07	0.0434924	4.24e-09	1
b1271	yciK	0.95957	0.865956	0.153982	1.81229e-05	0.0148813	1.3e-08	1
b1272	sohB	0.825164	0.193097	0.131751	6.8585e-08	0.00834887	2.2e-11	3
b1273	yciN	0.940985	0.707905	0.310704	2.93153e-05	0.07891	3.07e-08	2
b1274	topA	1.09879	0.795894	0.876342	0.717504	1.31746	0.455153	0
b1275	cysB	1.03297	0.919504	0.278787	0.0024184	0.0424257	2.09e-06	2
b1276	acnA	0.847626	0.428634	0.225706	2.85475e-05	0.0266574	1.03e-08	1
b1277	ribA	0.795475	0.528597	0.0968221	6.93924e-05	0.0258684	1.56e-06	1
b1278	pgpB	0.725642	0.00124707	0.178256	6.63871e-10	0.0453984	2.65e-12	1
b1279	yciS	0.853462	0.114366	0.341874	5.38819e-07	0.0719932	1.32e-10	2
b1280	yciM	0.793888	0.382501	0.45134	0.0108357	0.712476	0.209845	0
b1281	pyrF	0.929478	0.720244	0.168719	5.8654e-06	0.278199	9.05e-05	5
b1282	yciH	0.83313	0.501628	0.337028	0.002156	0.26898	0.000599641	5
b1283	osmB	0.921453	0.820124	3.80696	0.00367569	0.153981	0.000381711	6
b1284	yciT	0.753986	0.342782	0.086904	8.17359e-06	0.0155731	7.09e-08	1
b1285	gmr	0.828674	0.594691	1.30104	0.459507	0.0530976	8.49e-06	2
b1286	rnb	1.08971	0.732488	0.300667	0.000690676	0.0025091	6.09e-10	3
b1287	yciW	0.887464	0.742522	0.888297	0.744464	0.00568685	7.41e-08	3
b1288	fabI	0.995692	0.9791	0.130407	2.73831e-07	0.0153226	3.49e-10	1
b1289	ycjD	0.707697	0.00173796	0.131208	4.62113e-10	0.0446964	8.28e-12	1
b1290	sapF	0.846171	0.308087	0.145227	3.28016e-07	0.0124474	1.6e-10	1
b1291	sapD	0.827763	0.405018	0.120069	2.81281e-06	0.0166416	7.08e-09	1
b1292	sapC	0.727867	0.000478594	0.41526	8.98405e-08	0.0641565	2.04e-12	2
b1293	sapB	0.94693	0.736552	0.428661	0.000363619	0.0605594	1.21e-08	2
b1294	sapA	0.825136	0.498799	0.143623	4.21177e-05	0.019643	8.78e-08	1
b1295	ymjA	1.02299	0.943865	0.345464	0.00748195	0.040087	1.88e-06	2
b1296	puuP	0.842629	0.494443	0.154762	2.0602e-05	0.0546235	4.32e-07	1
b1297	puuA	1.26244	0.701346	0.0737534	0.00144675	0.0188952	6.47e-05	1
b1298	puuD	1.42855	0.650755	0.231518	0.0856228	0.0675461	0.00584507	2
b1299	puuR	1.08368	0.868647	0.198647	0.00704521	0.0504682	0.000107695	1
b1300	puuC	0.54865	0.0713423	0.0498686	2.044e-06	0.0233638	2.73e-07	1
b1301	puuB	0.408512	0.00291564	0.0876567	1.17591e-06	0.0627923	3.72e-07	1
b1302	puuE	0.548457	0.0690579	0.140688	6.81756e-05	0.0825131	9.3e-06	2
b1303	pspF	0.819806	0.0141438	0.154898	1.68617e-10	0.0657598	4.71e-12	2
b1304	pspA	2.09822	0.00853235	18.4285	2.23627e-07	0.631848	0.069505	6
b1305	pspB	2.07854	0.00990871	14.0426	6.19437e-07	0.28769	0.000324498	6
b1306	pspC	1.86804	0.0116012	10.0631	6.60315e-07	0.437975	0.00231424	6
b1307	pspD	1.49598	0.0642471	12.0146	2.3368e-07	0.342968	0.000286136	6
b1308	pspE	1.17153	0.445793	4.77362	1.82921e-05	0.347653	0.000402391	6
b1309	ycjM	1.03952	0.651668	1.08264	0.363291	0.969971	0.721906	0
b1310	ycjN	0.781978	0.0405523	0.906016	0.365399	0.822577	0.0908588	0
b1311	ycjO	0.966219	0.503812	0.971212	0.568574	0.908739	0.0832137	0
b1312	ycjP	1.02989	0.674908	0.703427	0.000488946	0.472236	9.7e-07	5
b1313	ycjQ	1.10591	0.332569	0.75177	0.0167848	0.503207	4.93e-05	0
b1314	ycjR	1.08142	0.192679	0.462272	1.26171e-07	0.351898	7.73e-09	5
b1315	ycjS	0.980001	0.911399	0.296501	5.45326e-05	0.143137	9.91e-07	5
b1316	ycjT	0.93894	0.435876	0.624564	0.000145116	0.417808	7.98e-07	5
b1317	ycjU	1.02694	0.563081	1.02773	0.552177	0.890818	0.0272302	0
b1319	ompG	0.993898	0.950976	1.09313	0.38113	0.950277	0.610936	0
b1320	ycjW	0.835621	0.00518738	0.192361	3.61619e-11	0.171119	1.89e-11	2
b1321	ycjX	0.857218	0.658649	2.31637	0.0332709	6.36278	0.000319535	6
b1322	ycjF	0.877857	0.730609	2.13198	0.0676551	8.82608	0.000175645	6
b1323	tyrR	0.86903	0.371886	0.197782	1.14602e-06	0.571574	0.00421795	5
b1324	tpx	0.911745	0.512189	0.118314	3.84734e-08	0.0381989	7.32e-10	1
b1325	ycjG	0.79724	0.0295786	0.335232	3.55488e-07	0.147806	2.04e-09	5
b1326	mpaA	0.862041	0.0108769	0.303275	4.48957e-10	0.141667	4.22e-12	5
b1327	ycjY	0.999819	0.998904	0.531946	0.000692251	0.220262	5.28e-07	5
b1328	ycjZ	0.844199	0.19429	0.444534	6.85326e-05	0.0809509	2.96e-09	2
b1329	mppA	0.97909	0.706692	0.116235	6.76282e-12	0.0919556	2.54e-12	2
b1330	ynaI	0.809146	0.2218	0.446506	0.000640502	0.309071	3.56e-05	5
b1332	ynaJ	1.27253	0.361753	0.46008	0.0121645	0.0236612	6.4e-08	1
b1333	uspE	0.691478	0.186776	0.391257	0.00507883	0.151155	3.41e-05	5
b1334	fnr	1.07668	0.729388	0.349398	0.000560318	0.0174164	5.16e-09	1
b1335	ogt	1.09394	0.280049	0.219614	5.66672e-09	0.0421703	5.47e-12	1
b1336	abgT	1.03077	0.559526	0.439134	2.58929e-08	0.359376	3.41e-09	5
b1337	abgB	1.02228	0.619754	0.322313	3.11504e-10	0.181849	6.5e-12	5
b1338	abgA	0.844663	0.329627	0.380167	0.000185555	0.182568	1.7e-06	5
b1339	abgR	0.774607	0.00159407	0.199295	2.06388e-10	0.125289	1.89e-11	2
b1340	ydaL	0.715962	0.182716	0.408004	0.00347449	0.165617	2.08e-05	5
b1341	ydaM	0.761212	0.120272	0.161138	7.09475e-07	0.0264995	1.26e-09	1
b1342	ydaN	0.987962	0.947483	0.25504	2.3267e-05	0.0574993	3.39e-08	2
b1343	dbpA	0.841072	0.174482	0.230337	3.25809e-07	0.0236808	5.38e-11	1
b1344	ttcA	0.903221	0.347416	0.148737	8.54068e-09	0.0148227	4.86e-12	1
b1345	intR	1.041	0.650364	0.582759	0.000111088	0.467093	6.54e-06	5
b1346	ydaQ	1.19339	0.0415898	1.0923	0.268543	0.999815	0.998089	0
b1347	ydaC	0.997847	0.982801	1.15033	0.182521	1.04446	0.665182	0
b1348	ralR	0.956697	0.514051	1.0174	0.797382	0.842927	0.0267315	0
b1349	recT	0.88463	0.0416373	0.540041	5.18082e-07	0.432289	3.11e-08	5
b1350	recE	1.10347	0.276867	0.456026	4.75822e-06	0.299071	1.02e-07	5
b1351	racC	1.01154	0.933274	1.35459	0.0474845	0.969823	0.823285	0
b1352	kilR	0.973431	0.727844	0.955976	0.562975	0.932097	0.372398	0
b1353	sieB	1.04626	0.32776	0.953649	0.305604	1.02436	0.595627	0
b1355	ydaG	0.723593	0.00869598	0.495741	4.05242e-05	0.464756	1.96e-05	5
b1356	racR	0.979232	0.90456	0.107222	2.04926e-07	0.0275789	2.54e-09	1
b1357	ydaS	0.875893	0.219326	0.870558	0.200454	0.760488	0.0225724	0
b1358	ydaT	1.02953	0.851371	1.12627	0.45065	0.799763	0.171657	0
b1359	ydaU	1.09852	0.130184	0.509887	4.99101e-07	0.368995	1.38e-08	5
b1360	ydaV	0.903303	0.284407	0.531559	4.46478e-05	0.213609	1.67e-08	5
b1361	ydaW	0.97317	0.73668	0.541757	1.9281e-05	0.343309	1.45e-07	5
b1362	rzpR	0.948553	0.661352	0.669057	0.00678678	0.530441	0.000341931	0
b1363	trkG	1.13574	0.378589	0.205528	6.75453e-07	0.122073	5.09e-08	2
b1365	ynaK	0.995314	0.969596	0.310106	2.85554e-06	0.199939	1.66e-07	5
b1366	ydaY	0.892041	0.563385	0.537394	0.00920388	0.226471	1.97e-05	5
b1368	ynaA	0.902903	0.0727834	0.824651	0.00375815	0.659543	1.25e-05	0
b1370	insH	1.10488	0.567594	0.149646	7.91733e-07	0.0189423	8.96e-10	2
b1372	stfR	0.971712	0.921803	0.846581	0.572132	0.250711	0.000758156	5
b1373	tfaR	0.83206	0.191962	0.667931	0.0122322	0.231166	8.5e-07	5
b1374	pinR	0.970295	0.914654	0.457411	0.0179059	0.0413869	6.04e-07	2
b1375	ynaE	0.923532	0.814842	0.216695	0.00106271	0.0139732	2.32e-07	1
b1376	uspF	0.677353	0.101439	0.150078	6.79826e-06	0.0347083	4.06e-08	1
b1377	ompN	0.972332	0.904647	1.24249	0.364629	0.731898	0.202544	0
b1378	ydbK	0.724748	0.356931	0.254139	0.00229757	0.0100095	1.24e-07	1
b1379	hslJ	0.951477	0.878909	0.870177	0.671483	0.5222	0.0695265	0
b1380	ldhA	0.954489	0.844999	1.12541	0.62193	0.811782	0.390598	0
b1381	ydbH	0.909344	0.555814	0.262021	8.44479e-06	0.0633216	1.27e-08	2
b1382	ynbE	1.05441	0.697251	0.295848	4.66507e-06	0.0531057	1.54e-09	2
b1383	ydbL	0.918695	0.710199	0.109145	2.29053e-06	0.0231089	1.86e-08	1
b1384	feaR	1.47828	0.366209	0.425259	0.0660485	0.250431	0.00772562	5
b1385	feaB	1.36575	0.379371	0.456709	0.0441241	0.183571	0.000608254	5
b1386	tynA	0.802731	0.00732138	0.518416	2.02088e-06	0.385573	7.09e-08	5
b1387	maoC	0.973085	0.94438	2.02145	0.0958444	0.690769	0.355436	0
b1388	paaA	1.01344	0.950349	1.10268	0.650341	0.636456	0.0571002	0
b1389	paaB	1.06835	0.410745	0.47748	3.22444e-06	0.397437	4.51e-07	5
b1390	paaC	1.19957	0.0787024	0.596344	0.000272988	0.373749	1.32e-06	5
b1391	paaD	1.09775	0.648847	0.558816	0.0156911	0.278242	9.11e-05	5
b1392	paaE	1.12065	0.18105	0.744367	0.00417662	0.484948	4.89e-06	5
b1393	paaF	0.851369	0.0052319	0.400873	3.35892e-09	0.313501	3.59e-10	5
b1394	paaG	0.970643	0.807581	0.523608	0.000336726	0.363937	9.41e-06	5
b1395	paaH	1.00469	0.967932	0.400115	1.44767e-05	0.183973	6.24e-08	5
b1396	paaI	1.11108	0.229189	0.860104	0.0973344	0.644515	0.000375668	0
b1397	paaJ	1.17127	0.350907	0.545117	0.00401476	0.157776	6.87e-07	5
b1398	paaK	1.00693	0.976916	0.231279	0.00011006	0.125397	6.15e-06	2
b1399	paaX	0.866548	0.122787	0.115382	4.19474e-10	0.0314074	4.85e-12	1
b1400	paaY	0.903215	0.316095	0.127043	2.15275e-09	0.0344262	2.12e-11	1
b1406	ydbC	0.828234	0.257784	0.443064	0.000468162	0.220668	3.13e-06	5
b1407	ydbD	0.909312	0.715964	0.473552	0.0153216	0.235768	0.000237458	5
b1408	ynbA	0.892663	0.435572	0.967016	0.815108	0.769606	0.0913874	0
b1409	ynbB	0.95876	0.756763	1.40748	0.0280555	1.02187	0.873367	0
b1410	ynbC	0.855969	0.115907	0.427012	3.71876e-06	0.223069	2.23e-08	5
b1411	ynbD	1.16955	0.0408578	0.521457	2.67516e-06	0.120073	4.98e-11	2
b1412	azoR	1.1072	0.155085	0.115203	3.96751e-11	0.0365598	6.97e-13	1
b1413	hrpA	0.76172	0.19742	0.121685	1.23887e-06	0.0303183	1.23e-08	1
b1414	ydcF	1.06216	0.557405	0.305351	4.66609e-07	0.0938881	7.94e-10	2
b1415	aldA	1.28492	0.397927	0.171604	0.000120663	0.010156	2.92e-08	1
b1418	cybB	1.11114	0.678621	0.145732	1.91423e-05	0.00910889	6.5e-09	1
b1419	ydcA	0.860496	0.556901	0.67332	0.141573	0.135418	1.41e-05	5
b1420	mokB	1.24415	0.211785	1.27927	0.163694	0.988918	0.946978	0
b1421	trg	0.849202	0.395439	0.0631646	5.81782e-08	0.0155929	1.29e-09	1
b1422	ydcI	0.925756	0.539663	0.13179	2.19741e-08	0.0392741	2.75e-10	1
b1423	ydcJ	0.996179	0.966695	0.809006	0.0402197	0.203154	1.2e-08	5
b1424	opgD	1.02692	0.939019	0.334965	0.00951641	0.0337295	2.25e-06	1
b1426	ydcH	0.932906	0.526079	0.42197	1.30376e-05	0.330243	1.5e-06	5
b1427	rimL	0.970979	0.745134	0.416379	2.38389e-06	0.0619432	5.58e-11	2
b1428	ydcK	0.943496	0.676312	0.4667	0.000255613	0.106327	2.35e-08	2
b1429	tehA	0.969883	0.795376	0.244807	3.69688e-07	0.0486462	3.09e-10	1
b1430	tehB	0.868813	0.348834	0.10195	3.28903e-08	0.0160319	1.28e-10	1
b1431	ydcL	0.874079	0.216469	0.168816	1.43581e-08	0.0600453	1.97e-10	1
b1432	insQ	0.575977	0.00022685	0.413675	4.87671e-06	0.122671	1.85e-09	5
b1433	ydcO	0.777063	0.271907	0.871041	0.538312	0.202738	3.07e-05	5
b1434	ydcN	0.856272	0.234961	0.371132	1.41192e-05	0.0524916	7.26e-10	2
b1435	ydcP	0.974884	0.877531	0.119691	1.89952e-07	0.0204651	6.92e-10	1
b1436	yncJ	1.2194	0.302682	15.0832	6.3063e-08	1.37813	0.110075	6
b1438	hicB	0.877769	0.364723	0.192027	4.37604e-07	0.0927383	1.54e-08	2
b1439	ydcR	0.843067	0.0497978	0.210508	3.29007e-09	0.0874121	4.89e-11	2
b1440	ydcS	0.905462	0.294338	0.17492	5.28411e-09	0.107794	5.32e-10	2
b1441	ydcT	1.06828	0.451757	0.243921	2.13847e-08	0.154429	1.56e-09	2
b1442	ydcU	0.903545	0.281727	0.183371	6.4113e-09	0.0800649	1.53e-10	2
b1443	ydcV	0.739427	0.000590618	0.368449	2.27427e-08	0.212283	3.73e-10	5
b1444	prr	0.872503	0.259558	0.168474	4.01783e-08	0.0738101	1.16e-09	2
b1445	ydcX	1.22528	0.24101	0.71803	0.0701857	0.132693	3.3e-07	2
b1446	ydcY	0.954689	0.684869	0.209423	1.04225e-07	0.066353	6.21e-10	2
b1447	ydcZ	0.971362	0.9142	0.153615	4.04931e-05	0.0260003	1.2e-07	1
b1448	yncA	1.01778	0.948659	0.126297	2.01835e-05	0.0101186	1.66e-08	3
b1449	yncB	0.932815	0.712772	0.786515	0.220967	0.0571246	4.12e-08	2
b1450	mcbR	0.718423	0.146337	1.05932	0.788758	0.371156	0.000902192	5
b1451	yncD	1.202	0.656631	0.456267	0.0802437	0.0409445	1.62e-05	2
b1452	yncE	1.2149	0.142143	0.301967	2.63622e-06	0.0286266	1.18e-10	1
b1453	ansP	0.766788	0.0117317	0.145462	1.33844e-09	0.0673458	5.64e-11	2
b1454	yncG	0.972175	0.584685	0.840969	0.00643787	0.636173	5.39e-06	0
b1455	yncH	0.95939	0.597181	1.16539	0.0725623	1.02282	0.772437	0
b1456	rhsE	0.825419	0.44566	0.891453	0.644507	0.602473	0.0632962	0
b1457	ydcD	1.02853	0.791459	0.88672	0.273364	0.779951	0.0382609	0
b1459	yncI	0.935593	0.526973	0.705042	0.0067052	0.638882	0.00145321	0
b1460	ydcC	0.987594	0.967861	0.694329	0.255888	0.500414	0.0459144	0
b1461	pptA	1.06674	0.444095	0.417473	1.16793e-06	0.315544	9.5e-08	5
b1462	yddH	0.919813	0.655997	1.23849	0.267921	0.533696	0.00662918	0
b1463	nhoA	1.03095	0.909743	0.572037	0.0600059	0.0862007	4.08e-06	2
b1464	yddE	0.902754	0.614311	0.187146	9.06116e-06	0.0378761	2.25e-08	1
b1465	narV	0.992489	0.922289	0.96318	0.629484	0.329705	6.98e-08	5
b1466	narW	0.664715	0.00796906	0.480605	0.000161042	0.253362	8.19e-07	5
b1467	narY	0.717089	0.000255387	0.287148	2.42723e-09	0.125583	2.01e-11	2
b1468	narZ	0.981757	0.909605	0.636602	0.0177463	0.109092	1.1e-07	2
b1469	narU	1.07585	0.36164	1.50847	0.000360662	0.470725	2.56e-06	6
b1470	yddJ	1.07377	0.255539	1.1146	0.0964362	1.11078	0.105928	0
b1471	yddK	0.953452	0.357084	0.964185	0.476858	0.922912	0.135919	0
b1472	yddL	1.05851	0.62369	1.11884	0.341452	1.02981	0.798991	0
b1473	yddG	0.758864	0.163888	0.071527	8.55521e-08	0.0599471	4.72e-08	1
b1474	fdnG	0.802496	0.731326	0.176579	0.0200624	0.109081	0.00557119	2
b1475	fdnH	1.07688	0.8878	1.52828	0.426955	0.509412	0.217784	0
b1476	fdnI	0.861353	0.387093	1.05191	0.765218	0.743258	0.10321	0
b1477	yddM	0.879453	0.156701	0.682099	0.00114399	0.173069	2.63e-09	5
b1478	adhP	0.773918	0.144407	0.661929	0.0293907	0.0168613	4.51e-10	1
b1479	maeA	0.869407	0.636223	0.526908	0.0505154	0.0181342	1.12e-07	1
b1480	sra	0.794744	0.362524	2.23328	0.00792805	0.20132	6.95e-05	6
b1481	bdm	0.916462	0.132389	1.55913	1.06039e-05	0.737049	0.000220181	0
b1482	osmC	0.808682	0.0718754	0.741971	0.0182056	0.0453864	1.08e-10	2
b1483	ddpF	0.744001	0.00103965	0.49798	1.0306e-06	0.221351	8.5e-10	5
b1484	ddpD	0.80014	0.0128748	0.302017	2.63343e-08	0.149279	3.49e-10	5
b1485	ddpC	0.963415	0.820868	0.289155	2.04422e-05	0.0982227	8.16e-08	2
b1486	ddpB	0.951147	0.571096	0.58996	0.000127182	0.45725	4.91e-06	5
b1487	ddpA	1.14951	0.629371	0.45927	0.0201429	0.252401	0.000688404	5
b1488	ddpX	1.12743	0.252955	0.569589	0.000233699	0.454471	1.56e-05	5
b1489	dosP	1.0944	0.534274	0.490944	0.000549185	0.168343	2.65e-07	5
b1490	dosC	1.00579	0.964527	0.220075	4.63534e-07	0.0692256	2.49e-09	2
b1491	yddW	0.883787	0.585939	0.37899	0.00143406	0.213173	4.44e-05	5
b1492	gadC	0.464582	0.00188326	0.0624638	4.76105e-08	0.0127403	6.99e-10	1
b1493	gadB	0.464585	0.000327565	0.0294875	4.93544e-10	0.0120335	5.82e-11	1
b1494	pqqL	1.97689	0.00109649	0.378423	7.86587e-05	0.0530635	4.44e-09	2
b1495	yddB	1.75328	0.0460788	0.277744	0.000449069	0.0678652	1e-06	2
b1496	yddA	1.98519	0.000678529	0.325388	1.4353e-05	0.163338	2.13e-07	5
b1497	ydeM	0.881068	0.130634	0.805225	0.0186693	0.716894	0.00161924	0
b1498	ydeN	0.803521	0.42585	0.0689606	1.97943e-06	0.0532785	8.75e-07	1
b1499	ydeO	1.06053	0.367561	0.922091	0.222328	0.81371	0.00828167	0
b1501	ydeP	0.650421	7.2358e-06	0.660798	9.96751e-06	0.246048	1.45e-10	5
b1502	ydeQ	0.922527	0.248254	3.18992	1.29576e-08	0.569988	8.71e-06	6
b1503	ydeR	0.962603	0.651282	2.94674	1.87477e-07	0.756062	0.00697073	6
b1504	ydeS	0.987668	0.852165	2.77242	3.82748e-08	0.838864	0.0227664	6
b1505	ydeT	0.94599	0.688286	2.19533	0.000192279	0.733559	0.0448153	6
b1506	yneL	1.08173	0.753824	1.72462	0.0503046	1.05175	0.840137	0
b1507	hipA	0.97298	0.756388	0.189893	5.5848e-09	0.094145	2.05e-10	2
b1508	hipB	1.0029	0.961868	0.168318	8.66106e-11	0.117404	1.52e-11	2
b1511	lsrK	0.885961	0.051191	0.368011	8.99205e-09	0.118534	7.17e-12	2
b1512	lsrR	0.806556	0.0563243	0.142149	4.75138e-09	0.0783244	3.9e-10	2
b1513	lsrA	1.01613	0.795254	0.893158	0.090208	0.875774	0.0525516	0
b1514	lsrC	1.07477	0.143657	0.581178	4.55866e-07	0.47341	2.44e-08	5
b1515	lsrD	0.965798	0.519736	0.8186	0.00353586	0.58268	1.66e-06	0
b1516	lsrB	0.974398	0.61099	0.367429	3.59465e-09	0.206473	4.98e-11	5
b1517	lsrF	0.933129	0.7877	0.409857	0.00549236	0.154405	2.75e-05	5
b1518	lsrG	0.815212	0.0410938	0.296765	1.09523e-07	0.183699	5.05e-09	5
b1519	tam	0.719769	0.000336817	0.258713	1.45705e-09	0.10917	1.38e-11	2
b1520	yneE	1.06444	0.685821	0.454458	0.000425095	0.135765	1.74e-07	5
b1521	uxaB	0.676413	0.00520699	0.328598	1.83695e-06	0.222878	1.25e-07	5
b1522	yneF	0.988165	0.937134	0.36279	5.32392e-05	0.126714	1.08e-07	5
b1523	yneG	0.87868	0.564809	0.131792	4.14521e-06	0.016915	7.32e-09	1
b1524	yneH	0.994194	0.986337	0.10915	6.82461e-05	0.0110354	1.45e-07	1
b1525	sad	0.999074	0.983197	0.23469	2.92659e-11	0.0349447	1.01e-14	1
b1526	yneJ	0.909609	0.0536219	0.586874	3.41907e-07	0.414098	3.31e-09	5
b1527	yneK	1.28255	0.0032976	0.700256	0.000282482	0.779825	0.00331094	0
b1528	ydeA	0.933688	0.682041	0.376568	0.00015719	0.0350557	3.09e-09	1
b1529	marC	0.810502	0.168074	0.323139	1.53078e-05	0.0951889	2.21e-08	2
b1530	marR	0.878087	0.419455	2.41926	0.000226328	0.1098	9e-08	6
b1531	marA	1.09543	0.615403	2.51559	0.000432523	0.144528	9.72e-07	6
b1532	marB	1.43054	0.141849	0.199669	3.72755e-05	0.0585871	2.74e-07	2
b1533	eamA	1.4124	0.437502	0.10166	0.000371848	0.0158276	2.92e-06	1
b1534	ydeE	0.897382	0.741603	0.185159	0.000413479	0.0316008	1.13e-06	1
b1535	ydeH	0.642641	0.192434	3.9796	0.00153784	0.233594	0.00108736	6
b1536	ydeI	0.870044	0.524801	2.97851	0.000483686	0.420437	0.00233557	6
b1537	ydeJ	1.05968	0.240462	0.966459	0.479008	0.758203	0.000164691	0
b1538	dcp	0.968163	0.758398	0.213232	5.52791e-08	0.0383196	5.09e-11	1
b1539	ydfG	0.888858	0.700996	0.0783597	8.87658e-06	0.00806704	2.94e-08	3
b1540	ydfH	1.14873	0.513869	0.140049	3.2413e-06	0.0169761	4.27e-09	1
b1541	ydfZ	0.641382	0.0586787	0.270568	0.000106996	0.0782517	3.59e-07	2
b1542	ydfI	0.930492	0.217713	0.724321	0.000180095	0.673534	3.58e-05	0
b1545	pinQ	0.935993	0.787246	0.344803	0.0013482	0.0393796	1.48e-07	2
b1547	stfQ	0.82245	0.150192	0.635338	0.00497373	0.484126	0.000205597	5
b1548	nohQ	0.865206	0.231621	0.383092	9.68957e-06	0.258496	4.75e-07	5
b1549	ydfO	1.02016	0.856191	1.15484	0.210277	0.983594	0.880554	0
b1550	gnsB	0.956359	0.416659	0.897581	0.0681836	0.834751	0.00681696	0
b1551	ynfN	0.937823	0.831365	1.53878	0.173907	0.374353	0.00785786	6
b1552	cspI	1.05794	0.889214	1.07897	0.85095	0.051389	2.57e-05	2
b1553	rzpQ	0.783731	0.158194	0.859587	0.365238	0.592695	0.00872163	0
b1554	arrQ	0.766964	0.0471398	0.537598	0.000390748	0.382761	1.21e-05	5
b1555	ydfR	0.624335	0.0567536	0.420058	0.00281218	0.293402	0.000256304	5
b1556	essQ	0.763846	0.105018	0.317895	2.35248e-05	0.211432	1.72e-06	5
b1557	cspB	0.806679	0.525673	0.092575	3.3629e-05	0.00982154	9.99e-08	3
b1558	cspF	0.763463	0.622757	0.112001	0.00228198	0.0170406	2.23e-05	1
b1559	quuQ	0.788207	0.0396015	0.756776	0.0199696	0.350615	1.5e-06	5
b1560	ydfU	1.00355	0.952464	0.771602	0.00132376	0.730091	0.000337306	0
b1561	rem	1.06414	0.827077	1.0954	0.749201	0.562891	0.0660209	0
b1562	hokD	0.788882	0.393455	0.859686	0.581984	0.232168	0.000307876	5
b1563	relE	1.06381	0.738082	0.899018	0.567275	0.191435	4.74e-06	5
b1564	relB	1.02342	0.920233	0.862679	0.527355	0.121717	4.11e-06	5
b1565	ydfV	1.14036	0.566272	0.412506	0.00274315	0.109663	2.3e-06	5
b1566	flxA	0.794638	0.55023	0.014222	6.85868e-07	0.0089944	2.73e-07	4
b1567	intK	0.851078	0.706353	0.0871756	0.00018818	0.169032	0.00179323	2
b1568	ydfX	0.980453	0.937394	0.882638	0.621653	0.814752	0.423109	0
b1569	dicC	1.00911	0.952978	1.54472	0.0164828	1.00644	0.966684	0
b1570	dicA	0.863792	0.419267	0.119777	3.80685e-07	0.0341139	5.3e-09	1
b1571	ydfA	0.879648	0.469753	0.517547	0.00341324	0.403291	0.000389728	5
b1572	ydfB	1.17148	0.14527	0.907281	0.35357	0.912006	0.378721	0
b1573	ydfC	0.977642	0.849973	0.816246	0.113009	0.752314	0.0355608	0
b1575	dicB	0.974999	0.7103	1.08637	0.240283	0.911599	0.193425	0
b1576	ydfD	0.947009	0.68402	0.952662	0.716724	0.870198	0.310226	0
b1577	ydfE	0.765928	0.173116	0.654624	0.0425365	0.377435	0.000364301	5
b1578	insD	0.847282	0.242128	0.289156	4.17478e-06	0.102496	1.74e-08	2
b1579	intQ	0.827293	0.527941	0.956053	0.879851	0.408584	0.0120343	0
b1580	rspB	1.14386	0.3797	0.454512	0.000352648	0.267742	5.57e-06	5
b1581	rspA	1.20874	0.402071	0.782321	0.283873	0.41897	0.00266397	5
b1582	ynfA	0.790686	0.0199136	0.35836	3.91487e-07	0.135051	8.12e-10	5
b1583	ynfB	0.91891	0.76947	0.735846	0.300918	0.0106454	2.93e-08	3
b1584	speG	0.992251	0.983154	0.649797	0.258705	0.0122259	3.71e-07	3
b1585	ynfC	0.910573	0.57716	0.201927	2.60077e-06	0.062607	1.8e-08	2
b1586	ynfD	0.849243	0.038619	2.04977	1.45643e-06	0.277126	7.27e-09	6
b1587	ynfE	0.375261	0.130838	0.138508	0.00807166	0.0546269	0.000712208	1
b1588	ynfF	0.83528	0.26358	0.186525	9.23113e-07	0.100934	5.47e-08	2
b1589	ynfG	0.769625	0.484852	0.700467	0.347537	0.150399	0.000431214	5
b1590	ynfH	0.791847	0.00228149	0.212853	2.1982e-10	0.0577156	6.67e-13	2
b1591	dmsD	0.839019	0.133647	0.136689	8.18422e-09	0.0528129	2.1e-10	1
b1592	clcB	0.778778	0.181787	0.235457	1.11097e-05	0.122682	4.25e-07	2
b1593	ynfK	0.359973	0.190306	0.0532986	0.00257463	0.142265	0.0235591	1
b1594	dgsA	1.01452	0.933838	0.135041	5.11272e-07	0.1559	9.95e-07	2
b1595	ynfL	0.925488	0.136683	0.227177	6.49717e-11	0.125525	2.67e-12	2
b1596	ynfM	0.923772	0.532065	0.261463	1.01244e-06	0.0270086	1.06e-10	1
b1597	asr	1.5972	0.100362	6.5502	3.34347e-05	0.367531	0.00329614	6
b1598	ydgD	0.81784	0.265272	0.524297	0.00379263	0.27766	2.56e-05	5
b1599	mdtI	0.667745	0.00210155	0.242886	7.44942e-08	0.119708	1.73e-09	2
b1600	mdtJ	0.700462	0.176227	0.357413	0.00196209	0.0678122	9.55e-07	2
b1601	tqsA	0.623736	0.0234201	6.48314	1.29349e-06	0.276835	3.23e-05	6
b1602	pntB	1.16631	0.551607	0.199847	8.99284e-05	0.141619	1.85e-05	2
b1603	pntA	1.21977	0.0495558	0.0969996	3.05168e-10	0.0139378	9.88e-13	1
b1604	ydgH	0.892289	0.174279	0.0844453	5.20808e-11	0.0221379	8.58e-13	1
b1605	ydgI	0.797184	0.331158	0.266364	0.000165106	0.0532802	1.85e-07	2
b1606	folM	0.828609	0.406296	0.145644	6.29982e-06	0.034129	4.13e-08	1
b1607	ydgC	1.30334	0.228069	0.0835961	4.30966e-07	0.0513029	8.43e-08	1
b1608	rstA	0.665492	0.178568	1.52744	0.163328	0.0169549	7.92e-08	2
b1609	rstB	0.603745	0.224339	1.1736	0.689297	0.0416493	1.29e-05	2
b1610	tus	0.841652	0.177137	0.777656	0.0607323	0.311857	2.62e-06	5
b1611	fumC	0.94709	0.872718	0.828941	0.583194	0.160701	0.00029525	5
b1612	fumA	1.17198	0.689899	0.194675	0.00190161	0.150853	0.00071192	2
b1613	manA	0.898894	0.778809	0.065497	3.03236e-05	0.00794959	2.04e-07	3
b1614	ydgA	0.794836	0.278465	0.393518	0.00100262	0.0102884	1.16e-09	1
b1615	uidC	0.987687	0.793682	0.912067	0.0749869	0.915111	0.0844105	0
b1616	uidB	1.08083	0.585909	0.560882	0.00204633	0.421812	0.000114933	5
b1617	uidA	1.06691	0.587274	0.567608	0.000703215	0.463037	6.9e-05	5
b1618	uidR	0.958461	0.903014	0.0984421	5.70474e-05	0.0271809	1.33e-06	1
b1619	hdhA	0.915945	0.392398	0.455467	1.52578e-05	0.0733226	2.78e-10	2
b1620	malI	0.867742	0.260635	0.128526	1.59834e-08	0.0494582	4.48e-10	1
b1621	malX	0.846904	0.20248	0.14	2.93776e-08	0.0519968	6.53e-10	1
b1622	malY	0.915211	0.381358	0.0858021	4.33175e-10	0.0384249	2.99e-11	1
b1623	add	0.774116	0.510126	1.26109	0.549833	0.357767	0.0214517	0
b1624	ydgJ	1.02846	0.778311	0.198852	2.25168e-08	0.0424704	4.17e-11	1
b1625	cnu	0.846987	0.279251	0.0597663	5.33059e-09	0.034394	9.97e-10	1
b1626	ydgK	0.895715	0.627297	0.076404	5.62725e-07	0.0210539	1.37e-08	1
b1627	rsxA	0.842002	0.562187	0.140861	5.66587e-05	0.046424	1.24e-06	1
b1628	rsxB	0.881142	0.431917	0.212984	2.23541e-06	0.0185475	3.71e-10	1
b1629	rsxC	0.86256	0.445681	0.210187	1.04426e-05	0.0431381	1.97e-08	1
b1630	rsxD	1.1126	0.724224	0.166284	0.000138934	0.0192652	1.61e-07	1
b1631	rsxG	0.835775	0.386413	0.199751	1.33885e-05	0.0763489	2.17e-07	2
b1632	rsxE	0.880153	0.660061	0.161137	8.65392e-05	0.023853	1.81e-07	1
b1633	nth	0.761971	0.00621034	0.377159	3.06241e-07	0.149592	6.37e-10	5
b1634	dtpA	0.589273	0.365386	0.245942	0.0313853	0.0442729	0.000269723	1
b1635	gst	0.842566	0.0509329	0.225589	5.4948e-09	0.0395401	3.7e-12	1
b1636	pdxY	0.919634	0.645607	0.0897265	1.39678e-07	0.0182386	1.27e-09	1
b1637	tyrS	0.825342	0.454277	0.166215	3.37934e-05	0.05397	5.02e-07	1
b1638	pdxH	1.01142	0.959755	0.0676691	3.65895e-07	0.00414174	5.04e-10	3
b1639	mliC	0.697187	0.00143553	0.763388	0.0083435	0.219743	8.14e-09	5
b1640	anmK	0.735922	0.0685372	0.195114	1.0362e-06	0.0360243	1.52e-09	1
b1641	slyB	0.733412	0.0512908	1.14511	0.354342	0.0757322	8.38e-09	2
b1642	slyA	0.711147	0.00325418	0.995831	0.962891	0.18567	5.91e-09	5
b1643	ydhI	0.677643	0.178004	0.967479	0.90424	0.0684095	2.25e-06	2
b1644	ydhJ	0.801155	0.109353	1.135	0.338077	0.293711	2.84e-06	5
b1645	ydhK	0.90125	0.0696588	0.813144	0.0025018	0.371394	5.33e-09	5
b1646	sodC	0.782961	0.133617	0.819664	0.21364	0.0849307	2.44e-08	2
b1647	ydhF	0.892439	0.425593	0.152712	1.32428e-07	0.013778	6.05e-11	1
b1648	ydhL	0.89107	0.203393	0.789997	0.0199123	0.428119	2.2e-06	5
b1649	nemR	1.23793	0.144027	2.01534	0.000450883	0.450273	0.000170681	6
b1650	nemA	0.970905	0.898952	0.773409	0.284153	0.375783	0.00168056	5
b1651	gloA	1.0594	0.823206	0.508261	0.0234534	0.498672	0.0206472	0
b1652	rnt	0.778253	0.241488	0.140035	2.75505e-06	0.0681227	1.69e-07	2
b1653	lhr	0.774608	0.00848277	0.378056	2.95566e-07	0.099717	9.67e-11	2
b1654	grxD	0.893181	0.209476	0.171718	2.63103e-09	0.0508083	1.86e-11	1
b1655	ydhO	0.955934	0.77338	0.122973	1.29532e-07	0.0765304	1.98e-08	2
b1656	sodB	0.995247	0.975287	0.0608711	7.80285e-09	0.00852724	5.27e-11	3
b1657	ydhP	0.847009	0.0873276	0.235527	2.35086e-08	0.0336974	7.81e-12	1
b1658	purR	0.958887	0.876062	0.115568	1.22603e-05	0.0247486	1.04e-07	1
b1659	ydhB	0.828794	0.0151151	0.081031	6.66786e-12	0.0475858	1.08e-12	1
b1660	ydhC	0.677708	0.158687	0.729551	0.244823	0.0722689	1.73e-06	2
b1661	cfa	0.921192	0.671379	0.230176	1.87005e-05	0.0210405	3.15e-09	1
b1662	ribC	0.819886	0.4416	0.0924177	3.19669e-06	0.0280587	8.39e-08	1
b1663	mdtK	0.800593	0.443264	0.276069	0.00106163	0.203094	0.000226569	5
b1664	ydhQ	0.920497	0.748318	0.642874	0.110098	0.626826	0.0935979	0
b1667	ydhR	0.860968	0.256129	0.201643	2.32094e-07	0.0529212	8.37e-10	1
b1668	ydhS	1.0157	0.950493	0.481239	0.014191	0.0917995	2.8e-06	2
b1669	ydhT	0.832224	0.0959539	0.392974	3.96299e-06	0.11926	2.21e-09	2
b1670	ydhU	0.961276	0.663981	0.368926	7.65788e-07	0.107249	4.49e-10	2
b1671	ydhX	0.744184	0.000770366	0.405628	6.70293e-08	0.218563	5.19e-10	5
b1672	ydhW	0.674411	0.0399823	0.342347	8.90923e-05	0.201886	3.13e-06	5
b1673	ydhV	1.0157	0.955248	0.454863	0.0162254	0.379443	0.00536846	5
b1674	ydhY	0.695453	0.217906	0.402471	0.00845162	0.342234	0.00326541	5
b1675	ydhZ	0.857878	0.542134	0.31481	0.000867673	0.221669	0.000122059	5
b1676	pykF	0.856621	0.517722	0.13886	8.74306e-06	0.00285369	4.34e-10	3
b1677	lpp	0.81817	0.761981	0.221933	0.0426358	0.240684	0.0526255	0
b1678	ynhG	0.75501	0.292314	1.00396	0.987831	0.448069	0.0103312	0
b1679	sufE	0.934659	0.701363	0.769362	0.157607	0.450863	0.0010152	5
b1680	sufS	0.878285	0.241243	0.69457	0.00605871	0.61552	0.000995673	0
b1681	sufD	0.744074	0.240371	1.22497	0.411175	1.14318	0.583956	0
b1682	sufC	0.886657	0.496007	1.05342	0.76602	0.951721	0.777174	0
b1683	sufB	0.898066	0.6772	1.73934	0.0527668	1.53215	0.120679	0
b1684	sufA	0.745079	0.348852	1.87326	0.0632401	0.890793	0.707126	0
b1685	ydiH	0.994957	0.979806	0.143031	2.30308e-06	0.087011	3.02e-07	2
b1686	ydiI	1.07013	0.612997	0.0683414	3.00025e-09	0.02305	1.23e-10	1
b1687	ydiJ	1.10782	0.700254	0.029653	1.42597e-07	0.00327103	1.57e-09	3
b1688	ydiK	0.776432	0.115457	0.310462	1.5566e-05	0.125622	9.85e-08	2
b1689	ydiL	1.05399	0.293105	1.0448	0.376555	1.01837	0.70852	0
b1690	ydiM	0.919169	0.357314	1.01266	0.888207	0.851991	0.0973278	0
b1691	ydiN	1.07746	0.306901	0.971412	0.684003	0.802391	0.0103044	0
b1692	ydiB	1.00242	0.990278	0.902731	0.608348	0.754493	0.176812	0
b1693	aroD	0.988222	0.814679	0.131161	4.40886e-12	0.020725	9.43e-15	1
b1694	ydiF	1.23077	0.00176178	0.379493	4.08142e-09	0.345906	1.74e-09	5
b1695	ydiO	0.832711	0.0875048	0.691256	0.00356106	0.502452	3.94e-05	0
b1696	ydiP	1.01702	0.931816	0.603316	0.0261057	0.40915	0.00102701	5
b1697	ydiQ	0.956908	0.408608	0.637998	6.8336e-06	0.497055	1.35e-07	5
b1698	ydiR	0.785116	0.055234	0.408651	1.44618e-05	0.266655	4.78e-07	5
b1699	ydiS	1.03834	0.695107	0.467673	1.32365e-05	0.309573	2.94e-07	5
b1700	ydiT	0.88838	0.579503	0.775754	0.247946	0.356778	0.000623971	5
b1701	fadK	1.0432	0.639601	0.81584	0.0434276	0.491943	1.39e-05	5
b1702	ppsA	1.40711	0.375387	0.187202	0.00117288	0.0549527	1.74e-05	2
b1703	ppsR	1.07343	0.560259	0.169544	5.54602e-08	0.0333905	1.28e-10	1
b1704	aroH	0.915807	0.391998	0.212345	3.69364e-08	0.0300949	1.75e-11	1
b1705	ydiE	0.788179	0.106314	0.12881	4.7987e-08	0.0484863	1.28e-09	1
b1706	ydiU	0.878387	0.144786	0.351933	2.54472e-07	0.11507	2.96e-10	2
b1707	ydiV	0.704261	0.0175178	0.119916	1.55446e-08	0.111279	1.13e-08	2
b1708	nlpC	0.821993	0.149235	0.135988	3.34472e-08	0.0618501	1.51e-09	1
b1709	btuD	0.881551	0.382783	0.231416	1.34787e-06	0.0417347	1.09e-09	1
b1710	btuE	0.934768	0.776196	0.176846	2.64754e-05	0.00622256	1.68e-09	3
b1711	btuC	0.865081	0.501205	0.11677	1.68196e-06	0.0226122	9.57e-09	1
b1712	ihfA	0.893882	0.559136	0.279822	5.48329e-05	0.0433237	1.94e-08	2
b1713	pheT	1.05477	0.64742	0.182586	5.74328e-08	0.0294856	6.3e-11	1
b1714	pheS	1.09473	0.590414	0.142957	4.63627e-07	0.00225158	1.1e-11	3
b1715	pheM	0.852554	0.560383	0.442441	0.0121998	0.474425	0.0189692	0
b1716	rplT	0.698664	0.220193	0.181853	0.000118431	0.0579672	1.6e-06	2
b1717	rpmI	1.05939	0.82178	0.539801	0.0339114	0.582664	0.0566485	0
b1718	infC	1.26078	0.0289704	0.791713	0.0280021	0.742653	0.00856899	0
b1719	thrS	1.12454	0.034927	0.482674	5.118e-08	0.0847534	5.27e-13	2
b1722	ydiY	0.893797	0.360128	0.110835	7.2367e-09	0.0826927	2.25e-09	2
b1723	pfkB	1.07129	0.694736	0.858246	0.391309	0.136569	5.71e-07	5
b1724	ydiZ	0.828725	0.44796	0.301303	0.000574315	0.0229703	3.49e-08	1
b1725	yniA	0.814328	0.319991	0.330127	0.000249319	0.0261151	8.05e-09	1
b1726	yniB	0.744091	0.0123658	0.170886	9.06065e-09	0.0372243	2.61e-11	1
b1727	yniC	1.087	0.424762	0.156648	8.42737e-09	0.037968	4.05e-11	1
b1728	ydjM	1.05532	0.619123	0.577687	0.00044462	0.363162	3.09e-06	5
b1729	ydjN	1.54995	0.0942967	0.382434	0.00246188	0.0289157	5.87e-08	1
b1730	ydjO	0.650756	0.0265088	0.63689	0.0212535	0.330179	6.25e-05	5
b1731	cedA	0.720983	6.05385e-05	0.369492	3.05524e-09	0.239383	1.02e-10	5
b1732	katE	1.19018	0.637173	0.956573	0.90372	0.0552658	1.41e-05	2
b1733	chbG	1.05335	0.828892	0.516981	0.018988	0.0898576	1.77e-06	2
b1734	chbF	1.04505	0.703784	0.376378	7.76009e-06	0.26546	5.29e-07	5
b1735	chbR	0.980107	0.898477	0.15451	3.9685e-07	0.0899312	3.89e-08	2
b1736	chbA	0.963927	0.826968	0.536934	0.003775	0.264895	1.37e-05	5
b1737	chbC	0.817973	0.183981	0.297672	8.15843e-06	0.096743	2.27e-08	2
b1738	chbB	0.774198	0.0548989	0.155585	3.48449e-08	0.0739002	1.52e-09	2
b1739	osmE	0.603355	9.47362e-05	0.351327	1.80484e-07	0.0544205	1.26e-11	2
b1740	nadE	1.23867	0.00215085	0.306123	1.10879e-09	0.0607587	3.19e-13	2
b1741	cho	0.96787	0.634926	0.296461	9.66178e-09	0.0633309	4.29e-12	2
b1742	ves	0.81276	0.00994639	0.0726327	5.24473e-12	0.0353793	5.24e-13	1
b1743	spy	0.75537	0.410976	10.5894	3.61522e-05	0.398199	0.0189043	6
b1744	astE	0.699902	0.00120827	0.480993	4.25621e-06	0.201136	3.41e-09	5
b1745	astB	0.628698	2.00738e-05	0.285289	2.63505e-09	0.160468	7.54e-11	5
b1746	astD	0.594389	0.00316675	0.430122	0.000103172	0.282888	3.59e-06	5
b1747	astA	0.925277	0.782055	0.84641	0.555471	0.455362	0.0170827	0
b1748	astC	0.794735	0.403172	0.951101	0.852607	0.399486	0.0062109	5
b1749	xthA	0.887633	0.581834	0.331835	0.000420754	0.152682	5.8e-06	5
b1750	ydjX	0.458979	0.107063	0.0615262	0.000100418	0.0284535	1.36e-05	1
b1751	ydjY	0.32244	0.151073	0.025911	0.000586995	0.0099857	0.000102495	1
b1752	ydjZ	0.288439	0.139491	0.0382265	0.00192892	0.0220392	0.000668632	1
b1753	ynjA	0.643978	0.325179	0.168684	0.0020441	0.0556192	5.9e-05	1
b1754	ynjB	0.64227	0.187062	0.105246	3.6337e-05	0.0500997	3.25e-06	1
b1755	ynjC	0.869402	0.246884	0.282566	8.81793e-07	0.145645	1.89e-08	5
b1756	ynjD	1.00296	0.97421	0.231817	2.60441e-08	0.119715	8.03e-10	2
b1757	ynjE	0.450651	0.148078	0.0282351	4.48795e-05	0.0130258	8.72e-06	1
b1758	ynjF	0.845671	0.366125	0.132677	6.99321e-07	0.0358047	7.19e-09	1
b1759	nudG	0.777222	0.00757454	0.116479	1.35738e-10	0.0802797	3e-11	2
b1760	ynjH	0.856494	0.2279	0.127833	1.76382e-08	0.055987	7.55e-10	1
b1761	gdhA	1.13814	0.723836	0.0376989	4.65651e-06	0.00172382	1.16e-08	3
b1762	ynjI	1.00844	0.965712	0.100156	4.23937e-07	0.0496306	3.74e-08	1
b1763	topB	0.922791	0.845804	0.0801192	0.000112528	0.00806468	4.57e-07	3
b1764	selD	1.06938	0.788325	0.102207	3.97756e-06	0.00580572	2.4e-09	3
b1765	ydjA	0.997714	0.995627	0.107189	0.000314052	0.00245192	6.84e-08	3
b1766	sppA	0.993348	0.985441	0.195202	0.00113248	0.00936059	2.03e-07	1
b1767	ansA	0.887277	0.690938	0.0722315	5.70199e-06	0.00830177	2.58e-08	3
b1768	pncA	0.781887	0.0165094	0.154523	1.6715e-09	0.0282557	3.71e-12	1
b1769	ydjE	1.33926	0.00768525	0.359147	5.30518e-07	0.265082	4.99e-08	5
b1770	ydjF	1.05729	0.600981	0.63888	0.00161239	0.549907	0.000205798	0
b1771	ydjG	1.04189	0.448949	0.222306	1.28734e-10	0.192687	5.46e-11	5
b1772	ydjH	1.25766	0.123381	0.0801939	8.12525e-09	0.0599169	2.93e-09	1
b1773	ydjI	1.25625	0.0747943	0.0585336	5.34013e-10	0.0431559	2.04e-10	1
b1774	ydjJ	0.93416	0.168499	0.094206	5.25059e-13	0.0777063	2.49e-13	2
b1775	ydjK	0.988274	0.816457	0.103705	1.64119e-12	0.0998176	1.4e-12	2
b1776	ydjL	1.20099	0.212947	0.0593694	3.16341e-09	0.0221758	1.9e-10	1
b1777	yeaC	1.12661	0.67869	0.240243	0.000529452	0.0205078	1.17e-07	1
b1778	msrB	1.08829	0.866185	0.134074	0.00232628	0.00466043	1e-06	3
b1779	gapA	0.942621	0.827331	0.14475	3.22735e-05	0.0216939	7.94e-08	1
b1780	yeaD	0.748334	0.289922	0.132457	1.90767e-05	0.00959986	1.13e-08	3
b1781	yeaE	0.813477	0.338636	0.170859	8.29248e-06	0.034167	2.5e-08	1
b1782	mipA	0.811452	0.627248	0.0377634	1.7995e-05	0.00581507	3.47e-07	3
b1783	yeaG	0.827758	0.300068	0.800141	0.226619	0.0454748	1.15e-08	2
b1784	yeaH	0.694005	0.004418	0.544212	0.000128746	0.176267	1.36e-08	5
b1785	yeaI	0.63266	0.0681311	0.503934	0.0123179	0.466644	0.00696573	5
b1786	yeaJ	1.0986	0.15128	0.512311	9.1367e-07	0.408608	6.53e-08	5
b1787	yeaK	0.876643	0.354848	0.173235	2.27759e-07	0.0542224	2.08e-09	1
b1788	yoaI	0.944936	0.838851	0.074487	3.32829e-06	0.0477003	8.22e-07	1
b1789	yeaL	0.925064	0.53915	0.362506	1.14956e-05	0.127061	2.01e-08	5
b1790	yeaM	0.99798	0.967914	0.448348	2.64439e-08	0.0896344	8.31e-13	2
b1791	yeaN	0.688359	9.93896e-05	0.256325	1.00945e-09	0.108203	9.8e-12	2
b1792	yeaO	0.916239	0.497139	0.280513	1.83429e-06	0.109776	1.21e-08	2
b1793	yoaF	0.844584	0.187974	0.821507	0.131273	0.319085	3.31e-06	5
b1794	yeaP	0.928395	0.563677	0.0981887	7.79562e-09	0.0154422	3.15e-11	1
b1795	yeaQ	0.8855	0.604471	0.308896	0.000484185	0.0670733	4.88e-07	2
b1796	yoaG	1.38632	0.000494056	0.390997	6.5856e-08	0.316108	9.99e-09	5
b1797	yeaR	1.00629	0.97837	0.282293	0.000265295	0.119618	3.85e-06	2
b1798	leuE	0.721013	0.289318	0.21472	0.000419858	0.176409	0.000170396	5
b1799	dmlR	0.989784	0.883106	0.0937043	2.2302e-11	0.0314896	6.12e-13	1
b1800	dmlA	0.752676	0.00353084	0.339333	7.49462e-08	0.228821	4.21e-09	5
b1801	yeaV	0.987352	0.840304	0.743194	0.000792898	0.61771	1.86e-05	0
b1802	yeaW	1.03771	0.580112	0.671076	0.000128567	0.633626	4.4e-05	0
b1803	yeaX	0.943659	0.296531	0.67027	2.35362e-05	0.540902	5.68e-07	0
b1804	rnd	0.764127	0.1113	0.142388	2.68869e-07	0.0303385	1.21e-09	1
b1805	fadD	0.936309	0.729795	0.342269	0.000208716	0.072215	9.79e-08	2
b1806	yeaY	0.897322	0.599906	0.249044	4.93724e-05	0.0246843	8.4e-09	1
b1807	yeaZ	0.764411	0.00680495	0.149614	6.63725e-10	0.0178831	5.44e-13	1
b1808	yoaA	0.93412	0.65565	0.241175	3.26306e-06	0.025069	5.31e-10	1
b1809	yoaB	0.958678	0.608147	0.139436	5.60787e-10	0.0200945	8.58e-13	1
b1810	yoaC	1.01354	0.913171	0.240872	5.06106e-07	0.0783558	2.39e-09	2
b1811	yoaH	0.915293	0.569993	0.418175	0.000208803	0.109136	7.05e-08	2
b1812	pabB	0.92447	0.49397	0.122868	6.70973e-09	0.0211312	2.17e-11	1
b1813	nudL	0.825059	0.456284	0.136541	1.50041e-05	0.0353782	1.57e-07	1
b1814	sdaA	0.890922	0.542097	8.93462	4.57273e-07	5.89204	2.97e-06	6
b1815	adrB	0.786321	0.16082	0.898005	0.512399	0.541369	0.00333408	0
b1816	yoaE	0.968835	0.8499	0.140477	4.34917e-07	0.0478555	7.86e-09	1
b1817	manX	1.25522	0.543043	0.10576	0.000118927	0.00207451	1.73e-08	3
b1818	manY	1.30433	0.411293	0.192356	0.000389795	0.00382928	1.1e-08	3
b1819	manZ	1.0401	0.927907	0.050776	4.49469e-05	0.00200495	7.26e-08	3
b1820	yobD	0.625783	0.165411	0.0544343	4.21005e-06	0.0363641	1.35e-06	1
b1821	yebN	0.732236	0.047229	0.214419	8.07964e-07	0.123927	5.09e-08	2
b1822	rlmA	0.849627	0.504725	0.123231	6.28042e-06	0.0206922	2.48e-08	1
b1823	cspC	0.885066	0.593932	0.0896958	1.0765e-06	0.00202134	1.74e-10	3
b1824	yobF	1.14811	0.73429	0.117616	0.00034654	0.00162952	2.85e-08	3
b1825	yebO	0.589085	0.105254	3.54865	0.00178503	0.0661533	4.82e-06	6
b1826	mgrB	0.778843	0.275036	2.30368	0.00341477	0.0205138	1.1e-08	2
b1827	kdgR	0.814304	0.172834	0.0582756	3.45116e-09	0.0379362	9.24e-10	1
b1828	yebQ	0.932139	0.701097	0.599965	0.0172675	0.315915	8.69e-05	5
b1829	htpX	0.874893	0.518466	2.0683	0.0048581	3.46535	0.000118803	6
b1830	prc	0.993299	0.965932	0.24199	4.51484e-06	0.0114213	1.19e-10	1
b1831	proQ	1.12274	0.11867	0.306983	1.44091e-08	0.0434837	1.45e-12	2
b1832	yebR	0.981989	0.877063	0.103288	4.43907e-09	0.00609785	2.14e-12	3
b1833	yebS	0.976901	0.936246	0.286019	0.00149821	0.0402964	7.86e-07	2
b1834	yebT	0.779369	0.0462951	0.230152	1.57097e-07	0.0271115	3.58e-11	1
b1835	rsmF	0.836628	0.191982	0.176667	1.41382e-07	0.0204995	7.58e-11	1
b1836	yebV	0.909428	0.624083	0.829416	0.343107	0.0423836	2.02e-08	2
b1837	yebW	1.00795	0.948247	1.53778	0.0050617	0.0878563	3.34e-09	6
b1838	pphA	0.889241	0.578396	2.13417	0.00434275	0.0735811	2.55e-07	6
b1839	yebY	1.07306	0.748412	0.316947	0.000364249	0.089737	7.84e-07	2
b1840	yebZ	1.23642	0.21517	0.167071	8.44293e-07	0.00836655	9.35e-11	1
b1841	yobA	0.864701	0.470308	0.130183	1.43751e-06	0.0183275	3.02e-09	1
b1842	holE	0.897772	0.500863	0.251418	5.97766e-06	0.0354373	1.95e-09	1
b1843	yobB	0.776257	0.0381057	0.778162	0.0396232	0.0926376	1.32e-09	2
b1844	exoX	0.858779	0.02138	0.429725	5.10985e-08	0.0292784	7.13e-14	1
b1845	ptrB	1.04587	0.807547	0.372119	0.000301157	0.0291978	4.69e-09	1
b1846	yebE	1.02547	0.873079	9.49518	7.21884e-08	1.22009	0.224781	6
b1847	yebF	0.826812	0.139246	0.605684	0.00186892	0.0400553	2.23e-10	2
b1848	yebG	0.868491	0.343009	0.556698	0.0022071	0.0200143	1.95e-10	1
b1849	purT	0.822969	0.0631238	0.0130042	1.33207e-12	0.00835847	5.3e-13	4
b1850	eda	0.846451	0.571806	0.307666	0.00222463	0.186373	0.000181923	5
b1851	edd	0.664155	0.102134	0.127053	5.13582e-06	0.0116561	4.82e-09	3
b1852	zwf	0.981806	0.943101	0.163529	3.64013e-05	0.00592431	3.33e-09	3
b1853	yebK	0.99715	0.985903	0.105932	9.42652e-08	0.0117806	1.63e-10	1
b1854	pykA	0.636932	0.243104	0.165644	0.000656608	0.0743502	3.89e-05	2
b1855	lpxM	0.954116	0.688621	0.364288	6.42415e-06	0.0291079	6.48e-11	1
b1856	yebA	0.849531	0.238623	0.782558	0.0894633	0.0160155	5.16e-11	1
b1857	znuA	0.927341	0.594906	1.30265	0.0840992	0.021332	1.72e-10	2
b1858	znuC	0.916299	0.685822	0.434087	0.00284471	0.0552341	1.26e-07	2
b1859	znuB	1.07034	0.788209	0.752789	0.276469	0.701058	0.180845	0
b1860	ruvB	0.885483	0.184092	0.291178	7.98015e-08	0.0628454	4.19e-11	2
b1861	ruvA	0.931083	0.799717	0.482663	0.0247608	0.0676194	2.64e-06	2
b1862	yebB	1.07638	0.724886	1.41011	0.122896	0.886374	0.566331	0
b1863	ruvC	0.688743	0.0458468	0.19365	2.09616e-06	0.110135	1.48e-07	2
b1864	yebC	0.857735	0.60093	0.0901029	9.51275e-06	0.00350032	4.26e-09	3
b1865	nudB	0.792313	0.488207	0.0669393	1.06299e-05	0.00550438	3.08e-08	3
b1866	aspS	0.956516	0.892464	0.112912	5.88344e-05	0.0022548	6.56e-09	3
b1867	yecD	1.16179	0.667302	0.709488	0.335171	0.00745426	8.18e-08	3
b1868	yecE	0.940118	0.855523	0.534112	0.0880457	0.0152454	2.77e-07	1
b1869	yecN	0.923323	0.653271	0.181799	2.48403e-06	0.0174746	9.04e-10	1
b1870	cmoA	1.0298	0.706083	0.151163	5.09075e-10	0.0149128	2.6e-13	1
b1871	cmoB	0.917372	0.0777105	0.135929	1.6793e-12	0.0245575	4.63e-15	1
b1872	torZ	1.02294	0.709729	0.433038	1.01368e-07	0.264086	1.36e-09	5
b1873	torY	0.983734	0.888548	0.935782	0.573717	0.549627	0.000434005	0
b1874	cutC	0.846383	0.454171	0.721785	0.159644	0.111541	1.83e-06	2
b1875	yecM	0.904606	0.35408	0.157402	1.1236e-08	0.0399076	6.13e-11	1
b1876	argS	0.87416	0.0696496	0.130103	6.74256e-11	0.0187145	1.19e-13	1
b1877	yecT	1.18282	0.392967	0.181419	5.23745e-06	0.1598	2.81e-06	2
b1878	flhE	1.02792	0.884141	0.0344647	9.42661e-09	0.0266563	4.75e-09	1
b1879	flhA	0.982445	0.840661	0.00933254	3.15459e-13	0.00742206	2e-13	4
b1880	flhB	1.1251	0.141614	0.015362	2.15047e-13	0.0131606	1.52e-13	1
b1881	cheZ	0.834209	0.458988	0.00663031	2.24003e-09	0.0027449	4.9e-10	4
b1882	cheY	1.10679	0.101403	0.00285708	6.33372e-16	0.00204463	3.73e-16	4
b1883	cheB	0.900118	0.0821252	0.00386432	7.67751e-16	0.00335252	6.04e-16	4
b1884	cheR	0.804689	0.0180577	0.00514245	3.30675e-14	0.00378985	1.93e-14	4
b1885	tap	0.991364	0.934933	0.00377641	3.51258e-13	0.00221052	1.47e-13	4
b1886	tar	0.992023	0.946824	0.0023491	5.18281e-13	0.0017999	3.44e-13	4
b1887	cheW	0.846843	0.0509906	0.00505312	2.56871e-14	0.00477594	2.32e-14	4
b1888	cheA	1.12398	0.176346	0.00433126	3.85957e-14	0.00235283	1.4e-14	4
b1889	motB	1.06031	0.693907	0.00233088	3.77642e-12	0.00198526	2.95e-12	4
b1890	motA	1.01103	0.936795	0.00310175	3.10989e-12	0.00171287	1.23e-12	4
b1891	flhC	0.971857	0.910945	0.0153091	2.07482e-08	0.00711836	4.34e-09	4
b1892	flhD	0.903765	0.186671	0.0177093	2.16909e-13	0.00951247	5.54e-14	1
b1895	uspC	0.951986	0.811279	0.106819	8.68881e-07	0.0243341	8.38e-09	1
b1896	otsA	0.947716	0.819181	0.461173	0.00739554	0.0730106	6.89e-07	2
b1897	otsB	0.813928	0.300093	0.604695	0.0241169	0.029932	7.83e-09	1
b1900	araG	0.850384	0.396504	0.306408	8.7736e-05	0.141634	1.26e-06	5
b1901	araF	0.900632	0.327128	0.211715	4.89206e-08	0.0865625	7.06e-10	2
b1902	ftnB	0.826004	0.0357913	0.33974	1.28145e-07	0.16074	9.67e-10	5
b1904	yecR	1.18643	0.099026	0.0449162	3.53264e-11	0.0344131	1.62e-11	1
b1905	ftnA	1.1596	0.0824069	0.0565238	1.06325e-11	0.0462557	5.61e-12	1
b1906	yecH	0.688303	0.0460439	0.61817	0.0152167	0.522907	0.00286073	0
b1907	tyrP	0.792351	0.0256977	0.0957555	2.84027e-10	0.0762413	1.18e-10	2
b1908	yecA	0.920681	0.738216	0.472281	0.0114183	0.345149	0.00142935	5
b1912	pgsA	0.751667	0.283305	0.0779354	1.98789e-06	0.0196698	4.03e-08	1
b1913	uvrC	0.850465	0.592562	0.111375	2.67374e-05	0.00672232	1.78e-08	3
b1914	uvrY	1.00262	0.992456	0.12672	2.26289e-05	0.00246326	1.52e-09	3
b1915	yecF	0.664847	0.145698	0.336466	0.00194422	0.165609	4.84e-05	5
b1916	sdiA	0.804745	0.292539	0.113232	8.60093e-07	0.0356331	1.77e-08	1
b1917	yecC	0.89315	0.438509	0.452814	0.000246768	0.115946	4.63e-08	5
b1918	yecS	0.849854	0.595468	0.0943049	1.61252e-05	0.011767	5.96e-08	1
b1919	dcyD	0.90986	0.611934	0.125394	6.498e-07	0.0138707	8.26e-10	1
b1920	fliY	1.07129	0.651064	0.186455	7.24975e-07	0.0134522	1.18e-10	1
b1921	fliZ	1.27517	0.0317951	0.00340803	1.55537e-13	0.00165936	5e-14	4
b1922	fliA	0.953325	0.622679	0.0117032	1.21593e-12	0.00684673	4.12e-13	4
b1923	fliC	1.30534	0.019175	0.00408101	1.72775e-13	0.00178571	4.56e-14	4
b1924	fliD	1.16958	0.00587658	0.00372243	1.08192e-16	0.0017009	3.1e-17	4
b1925	fliS	1.14411	0.0209505	0.00192904	9.16109e-17	0.00157553	6.76e-17	4
b1926	fliT	0.932243	0.650926	0.00448627	1.62994e-11	0.00353597	1.08e-11	4
b1927	amyA	0.921733	0.634887	0.127859	3.42471e-07	0.00785209	1.19e-10	3
b1928	yedD	0.912252	0.794833	0.447116	0.0422192	0.220085	0.00147698	5
b1929	yedE	0.748218	0.172181	0.0474494	4.37257e-08	0.00877413	7.2e-10	3
b1930	yedF	0.776806	0.304143	0.0655361	5.6079e-07	0.0348121	8.44e-08	1
b1931	yedK	0.884313	0.492863	0.381411	0.000273805	0.191096	3.28e-06	5
b1932	yedL	0.929414	0.214022	0.497219	2.70028e-07	0.35473	7.18e-09	5
b1936	intG	1.23581	0.604161	0.0740296	7.65229e-05	0.043384	1.66e-05	1
b1937	fliE	0.994796	0.970542	0.0844208	1.12608e-08	0.0637299	4.13e-09	1
b1938	fliF	1.02521	0.839212	0.00595797	3.07703e-12	0.00383511	1.41e-12	4
b1939	fliG	1.04562	0.624081	0.00351595	6.72239e-14	0.00275145	4.49e-14	4
b1940	fliH	1.22189	0.0187029	0.00395215	1.03106e-14	0.00185165	3.03e-15	4
b1941	fliI	1.04513	0.767417	0.00853612	3.88682e-11	0.00597051	1.96e-11	4
b1942	fliJ	1.22187	0.223271	0.00463692	2.16392e-11	0.00289107	9.74e-12	4
b1943	fliK	1.28065	0.0487716	0.00476879	9.08368e-13	0.00189357	1.99e-13	4
b1944	fliL	1.1175	0.0541186	0.00428832	4.80598e-16	0.00215255	1.54e-16	4
b1945	fliM	1.23155	0.00151245	0.00447106	2.78217e-16	0.00208755	7.92e-17	4
b1946	fliN	1.12266	0.106831	0.00403894	4.70172e-15	0.00332039	3.37e-15	4
b1947	fliO	1.20827	0.0096821	0.00873247	7.48473e-15	0.00337278	1.31e-15	4
b1948	fliP	1.07075	0.674689	0.0243422	9.00794e-10	0.0136834	2.32e-10	1
b1949	fliQ	1.17198	0.283969	0.0102273	3.94787e-11	0.0066831	1.7e-11	4
b1950	fliR	1.26057	0.279444	0.0497385	6.47831e-08	0.0429004	4.16e-08	1
b1951	rcsA	0.978401	0.937365	0.440274	0.0133247	0.370255	0.00466298	5
b1952	dsrB	1.04876	0.866426	0.871086	0.627802	0.26667	0.000829811	5
b1953	yodD	0.844701	0.145622	1.718	0.000552457	0.47088	4.35e-05	6
b1955	yedP	0.782759	0.00471643	1.02769	0.691888	0.29088	8.67e-09	5
b1956	yedQ	0.838229	0.474029	0.569014	0.0396372	0.288252	0.000433413	5
b1957	yodC	0.95442	0.858753	0.507764	0.0249816	0.200781	0.00011049	5
b1958	yedI	0.789226	0.41863	0.186233	0.000159497	0.0448738	9.22e-07	1
b1959	yedA	1.05513	0.74701	0.454853	0.000741052	0.0938324	7.42e-08	2
b1960	vsr	0.911593	0.292199	0.277277	4.53084e-08	0.106269	2.47e-10	2
b1961	dcm	0.896337	0.540889	0.221013	7.32993e-06	0.0684923	4.31e-08	2
b1962	yedJ	0.896011	0.680513	0.501775	0.0245346	0.381218	0.00424467	5
b1963	yedR	0.837039	0.533274	1.05132	0.859514	0.899285	0.708155	0
b1967	hchA	0.760406	0.159017	0.255994	2.40103e-05	0.0417945	1.28e-08	1
b1968	yedV	0.984426	0.942458	0.207889	2.943e-05	0.0721659	3.34e-07	2
b1969	yedW	1.017	0.956717	0.161149	0.000153005	0.0140133	1.04e-07	1
b1970	hiuH	0.920075	0.750766	0.0912651	3.95074e-06	0.0457032	4.17e-07	1
b1971	yedY	0.881403	0.393121	0.219963	1.23272e-06	0.0523408	2.74e-09	1
b1972	yedZ	0.796321	0.318901	0.413141	0.00243608	0.0917706	9.65e-07	2
b1973	zinT	1.0007	0.996763	9.32302	1.69442e-07	0.177373	1.67e-06	6
b1974	yodB	0.85939	0.29627	1.2055	0.204254	0.61478	0.00569315	0
b1976	mtfA	1.04713	0.881626	0.0900695	1.57363e-05	0.00958572	4.57e-08	3
b1978	yeeJ	0.866026	0.0243348	0.194249	7.97072e-11	0.0717444	8.82e-13	2
b1981	shiA	1.0854	0.843607	0.0942039	0.000195821	0.00562495	2.5e-07	3
b1982	amn	1.1714	0.6766	0.114073	0.000181197	0.00274307	3.21e-08	3
b1983	yeeN	0.950401	0.576689	0.0477599	2.39876e-11	0.0283181	5.33e-12	1
b1985	yeeO	0.904431	0.396575	0.780817	0.0549384	0.0875203	2.08e-09	2
b1987	cbl	0.8089	0.568682	0.527062	0.106417	0.0516766	1.21e-05	2
b1988	nac	0.72976	0.351257	0.113708	6.22865e-05	0.0705013	1.21e-05	2
b1990	erfK	0.772626	0.0356518	0.234262	1.3154e-07	0.0683154	4.34e-10	2
b1991	cobT	0.983923	0.868188	0.198468	1.86295e-08	0.0298032	1.27e-11	1
b1992	cobS	0.966083	0.790922	0.202329	2.86199e-07	0.0244807	1.14e-10	1
b1993	cobU	0.873037	0.238332	0.123469	5.54594e-09	0.0688397	5.52e-10	2
b1994	insH	1.1846	0.0410581	0.246491	5.19841e-09	0.0510517	4.27e-12	2
b1999	yeeP	0.956131	0.47538	0.725363	0.000396753	0.501232	6.96e-07	0
b2000	flu	0.982096	0.945881	0.122753	1.4219e-05	0.00280322	1.28e-09	3
b2001	yeeR	0.910934	0.453649	0.112272	9.39625e-09	0.023927	6.2e-11	1
b2002	yeeS	0.79082	0.112584	0.494741	0.000441869	0.245921	1.56e-06	5
b2003	yeeT	0.686294	5.21168e-05	0.452239	7.73685e-08	0.299199	1.58e-09	5
b2004	yeeU	0.988345	0.792743	0.690702	9.09385e-06	0.617827	9.11e-07	0
b2005	yeeV	0.91944	0.267881	0.836062	0.0320377	0.57221	1.89e-05	0
b2006	yeeW	0.948339	0.330503	0.718089	9.65334e-05	0.49809	1.59e-07	5
b2007	yeeX	0.738075	0.301098	0.090752	8.1599e-06	0.00901024	1.92e-08	3
b2008	yeeA	0.884627	0.462876	0.37481	0.000136819	0.0538907	9.84e-09	2
b2009	sbmC	0.863272	0.393665	0.614778	0.015107	0.0892688	7.25e-08	2
b2010	dacD	0.830573	0.56791	0.725311	0.331386	0.218471	0.000771682	5
b2011	sbcB	0.838142	0.266888	0.190879	9.40182e-07	0.0293123	8.86e-10	1
b2012	yeeD	0.952494	0.845961	0.961793	0.876386	0.346899	0.00163083	5
b2013	yeeE	0.983164	0.945933	0.856296	0.539647	0.241533	0.000200545	5
b2014	yeeF	0.927352	0.631701	0.134555	1.95548e-07	0.0304748	1.15e-09	1
b2015	yeeY	0.980855	0.939926	0.432733	0.00782265	0.170479	4.3e-05	5
b2016	yeeZ	1.04294	0.845591	0.427858	0.0025964	0.0237552	1.22e-08	1
b2017	yefM	0.95016	0.662751	0.673597	0.00637263	0.0155489	1.37e-11	1
b2018	hisL	0.744428	0.397193	0.307653	0.00575902	0.132627	0.000146748	2
b2019	hisG	0.862097	0.703076	0.113893	0.00022112	0.00208422	2.7e-08	3
b2020	hisD	1.00934	0.978628	0.226735	0.00151892	0.00211182	9.85e-09	3
b2021	hisC	0.997435	0.994049	0.231325	0.00157564	0.0018766	7.66e-09	3
b2022	hisB	1.05913	0.842886	0.244656	0.000627134	0.00210243	1.8e-09	3
b2023	hisH	0.848408	0.589168	0.156363	0.000108442	0.0023004	3.07e-09	3
b2024	hisA	1.12014	0.638346	0.334393	0.000975031	0.00436946	1.01e-09	3
b2025	hisF	1.14598	0.597934	0.340869	0.00171662	0.00764371	5.2e-09	3
b2026	hisI	0.862951	0.483787	0.171213	7.50534e-06	0.0106981	1.41e-09	3
b2027	cld	1.04526	0.855047	0.107794	3.77469e-06	0.00398145	9.37e-10	3
b2028	ugd	0.91633	0.649925	0.503484	0.00459994	0.37308	0.00041415	5
b2029	gnd	1.08586	0.743768	0.107206	5.10613e-06	0.00318467	9.17e-10	3
b2032	wbbK	0.937522	0.835939	0.0391478	1.27277e-06	0.00696085	2.63e-08	3
b2033	wbbJ	1.19915	0.41882	0.117392	2.3611e-06	0.00968131	2.03e-09	3
b2034	wbbI	0.98395	0.96108	0.0437331	3.02216e-06	0.00664885	4.34e-08	3
b2035	rfc	1.03437	0.89572	0.0399433	2.47739e-07	0.00598511	3.45e-09	3
b2036	glf	1.07571	0.842839	0.0420722	6.66119e-06	0.00468742	6.05e-08	3
b2037	rfbX	0.9756	0.949027	0.0319202	4.96594e-06	0.00605022	1.49e-07	3
b2038	rfbC	1.07298	0.838513	0.0316355	1.81766e-06	0.00344096	2.02e-08	3
b2039	rfbA	1.13496	0.639138	0.0472383	5.79109e-07	0.00215571	9.18e-10	3
b2040	rfbD	1.09831	0.714517	0.0957127	3.82888e-06	0.00262347	7.83e-10	3
b2041	rfbB	1.05651	0.877282	0.0572051	1.19933e-05	0.00291409	2.04e-08	3
b2042	galF	0.866422	0.146395	0.091505	3.08577e-10	0.0217704	3.6e-12	1
b2043	wcaM	0.812719	0.0566436	0.200725	2.10575e-08	0.162139	6.61e-09	2
b2044	wcaL	0.706214	0.0337959	0.36581	3.92606e-05	0.103729	3.04e-08	2
b2045	wcaK	0.906035	0.336116	0.316223	5.19798e-07	0.203462	2.7e-08	5
b2046	wzxC	1.0379	0.499333	0.700738	6.60952e-05	0.621593	5.87e-06	0
b2047	wcaJ	1.0299	0.791559	0.874199	0.244467	0.636792	0.00214429	0
b2048	cpsG	0.817277	0.00348005	0.714312	9.35922e-05	0.549433	6.96e-07	0
b2049	cpsB	1.01946	0.816551	0.890796	0.18446	0.415303	1.1e-06	5
b2050	wcaI	1.00178	0.990252	1.01934	0.895102	0.528077	0.00126039	0
b2051	gmm	1.03201	0.504175	0.625396	1.70864e-06	0.552064	2.07e-07	0
b2052	fcl	1.02161	0.71447	0.564116	2.11017e-06	0.345892	7.66e-09	5
b2053	gmd	0.814202	0.034852	0.376237	5.72762e-07	0.286668	6.16e-08	5
b2054	wcaF	1.09253	0.0900143	1.02604	0.596295	1.04716	0.350182	0
b2055	wcaE	0.859799	0.00846648	0.790079	0.000497884	0.708112	2.53e-05	0
b2056	wcaD	0.962954	0.685924	0.830602	0.0688341	0.724511	0.00558137	0
b2057	wcaC	0.911914	0.101919	0.558658	7.03349e-07	0.447889	3.77e-08	5
b2058	wcaB	1.05382	0.369275	0.809343	0.00378013	0.542524	9.94e-07	0
b2059	wcaA	0.821651	0.0328718	0.539088	1.85067e-05	0.318437	8e-08	5
b2060	wzc	1.14403	0.441367	1.07971	0.657316	0.668614	0.0382261	0
b2061	wzb	0.927013	0.239635	0.758203	0.00114016	0.60982	1.29e-05	0
b2062	wza	0.86465	0.218078	0.861761	0.208498	0.699988	0.00951083	0
b2063	yegH	0.87935	0.676944	0.0733604	7.44567e-06	0.0101219	4.81e-08	3
b2064	asmA	0.909917	0.42495	0.34745	4.18788e-06	0.0864295	2e-09	2
b2065	dcd	0.896295	0.547158	0.156089	1.38515e-06	0.0263128	2.95e-09	1
b2066	udk	0.828549	0.148179	0.104036	6.89865e-09	0.0202325	4.13e-11	1
b2067	yegE	0.88135	0.598994	0.234811	0.000118005	0.052507	2.73e-07	1
b2068	alkA	1.19886	0.01136	0.647184	2.67539e-05	0.170609	7.85e-11	5
b2069	yegD	0.738991	0.0187148	0.16382	1.96439e-08	0.10659	2.7e-09	2
b2070	yegI	0.816787	0.0597403	0.511662	4.34275e-05	0.399029	3.01e-06	5
b2071	yegJ	0.909442	0.729205	1.11802	0.68449	0.671989	0.167743	0
b2072	yegK	0.888053	0.48758	1.42437	0.0582209	0.537721	0.00395862	0
b2073	yegL	0.913326	0.262521	0.90009	0.198314	0.733118	0.00245085	0
b2074	mdtA	0.583871	7.49505e-05	0.306604	8.0132e-08	0.178257	2.42e-09	5
b2075	mdtB	0.885059	0.435476	0.43015	0.000261735	0.0937186	3.72e-08	2
b2076	mdtC	0.692207	0.00757995	0.651641	0.0031099	0.218655	1.17e-07	5
b2077	mdtD	0.718927	0.00301276	0.863731	0.11186	0.113879	3.55e-10	5
b2078	baeS	0.790611	0.00135069	0.57001	1.27508e-06	0.413188	2.09e-08	5
b2079	baeR	0.980954	0.844988	0.297545	2.78398e-07	0.144243	3.71e-09	5
b2080	yegP	0.95549	0.429754	0.733509	0.000265873	0.503192	3.28e-07	0
b2081	yegQ	0.839362	0.297076	0.255958	8.61489e-06	0.0156333	3.29e-10	1
b2082	ogrK	0.86557	0.59677	0.941992	0.82557	0.555559	0.0512355	0
b2083	yegZ	1.13528	0.715881	0.532929	0.0939436	0.27862	0.00393707	5
b2085	yegR	0.902531	0.0768118	0.579166	1.414e-06	0.554193	7.09e-07	0
b2086	yegS	0.788604	0.00428254	1.07846	0.264926	0.274226	3.62e-09	5
b2091	gatD	1.23261	0.534759	0.0288906	1.0585e-06	0.00203162	6.39e-09	3
b2092	gatC	1.29754	0.608172	0.0842582	0.000589838	0.00140823	1.71e-07	3
b2093	gatB	1.24116	0.765514	0.0162357	0.00019345	0.0013641	4.04e-06	3
b2094	gatA	1.29131	0.601869	0.108429	0.000972052	0.0017557	1.68e-07	3
b2095	gatZ	1.34186	0.429489	0.417434	0.0352646	0.0184552	8.39e-07	1
b2096	gatY	1.28988	0.523441	0.13974	0.000522339	0.0016393	2.23e-08	3
b2097	fbaB	0.78085	0.397924	0.531362	0.0484113	0.00791675	1.58e-08	3
b2098	yegT	0.967525	0.819809	0.387139	6.47494e-05	0.136114	1.02e-07	5
b2099	yegU	0.787289	0.082955	0.3789	1.81818e-05	0.263455	1.16e-06	5
b2100	yegV	0.905077	0.158033	0.15864	1.5974e-10	0.0853723	1.03e-11	2
b2101	yegW	0.919949	0.653297	0.0917912	1.82156e-07	0.0263884	3.77e-09	1
b2102	yegX	0.977679	0.911952	0.328195	0.000268912	0.048113	5.07e-08	2
b2103	thiD	0.95662	0.771381	0.751367	0.08425	0.301086	1.42e-05	5
b2104	thiM	1.09696	0.271	0.45532	2.43252e-06	0.272881	2.62e-08	5
b2105	rcnR	0.95157	0.716274	0.406316	6.01384e-05	0.220442	7.15e-07	5
b2106	rcnA	0.980535	0.916024	0.739858	0.129455	0.461092	0.00183763	5
b2107	yohN	0.88451	0.370458	0.873534	0.325958	0.596164	0.00293869	0
b2108	yehA	0.991717	0.888834	0.875648	0.0460501	0.755725	0.000786069	0
b2109	yehB	0.643098	0.00624302	0.61213	0.0033366	0.477373	0.000195055	5
b2110	yehC	0.650755	0.0519643	0.531366	0.00901007	0.457696	0.00260692	5
b2111	yehD	0.585568	0.154336	0.439352	0.0399013	0.43242	0.0369387	0
b2112	yehE	0.7817	0.012221	0.496304	7.17049e-06	0.358779	2.47e-07	5
b2113	mrp	0.783474	0.120809	0.0966646	2.75126e-08	0.00708469	2.4e-11	3
b2114	metG	1.25837	0.428324	0.167706	9.35509e-05	0.00539447	7.37e-09	3
b2118	yehI	1.0214	0.668467	0.683019	1.63831e-05	0.556374	3.8e-07	0
b2119	yehL	0.962269	0.714668	0.816466	0.0765215	0.643243	0.00168455	0
b2120	yehM	0.938058	0.217487	0.725501	7.33776e-05	0.617614	2.39e-06	0
b2121	yehP	0.722608	0.00366111	0.556246	5.29772e-05	0.282369	6.41e-08	5
b2122	yehQ	0.761239	0.000451724	0.542298	5.60631e-07	0.393466	1.18e-08	5
b2123	yehR	0.834408	0.193495	0.744306	0.0468329	0.499051	0.000368825	5
b2124	yehS	0.880736	0.439079	0.143156	3.4734e-07	0.0402358	3.39e-09	1
b2125	yehT	0.943791	0.62664	0.103992	4.83931e-09	0.0138088	1.19e-11	1
b2126	yehU	0.819127	0.0123891	0.0839294	9.30746e-12	0.036034	5.73e-13	1
b2127	mlrA	0.819344	0.0510005	0.682553	0.00180443	0.367437	8.34e-07	5
b2128	yehW	0.766343	0.0853051	0.580507	0.0031248	0.0956859	1.95e-08	2
b2129	yehX	0.78255	0.112033	0.646871	0.0116822	0.0696657	6.6e-09	2
b2130	yehY	0.892892	0.319889	0.626328	0.00165292	0.0707563	6.09e-10	2
b2131	osmF	0.959876	0.732401	0.811427	0.104038	0.212392	1.76e-07	5
b2132	bglX	0.975645	0.874725	0.100479	5.61974e-08	0.0119274	1.22e-10	1
b2133	dld	0.897638	0.634483	0.0762204	5.66294e-07	0.00346633	3.85e-10	3
b2134	pbpG	0.947681	0.884491	0.360686	0.0186047	0.0961729	8.53e-05	2
b2135	yohC	0.980987	0.956346	22.6828	5.02841e-06	21.9916	5.48e-06	6
b2136	yohD	0.698947	0.0521408	0.505835	0.00196724	0.133897	3.25e-07	5
b2137	yohF	0.907527	0.303199	0.870419	0.152103	0.287315	1.13e-07	5
b2139	mdtQ	0.905458	0.188276	0.947345	0.458911	0.813674	0.0154582	0
b2140	dusC	0.769417	0.0590583	0.209516	2.57151e-07	0.106969	9.59e-09	2
b2141	yohJ	0.973706	0.928282	0.773685	0.39541	0.369559	0.00664508	5
b2142	yohK	0.924604	0.681724	1.44877	0.0747488	0.550224	0.0096828	0
b2143	cdd	0.61788	0.156837	0.949852	0.87299	0.31279	0.00438309	5
b2144	sanA	0.774774	0.0347713	0.290178	4.79146e-07	0.368325	3.2e-06	5
b2145	yeiS	0.966601	0.687569	0.462434	3.88618e-06	0.430042	1.77e-06	5
b2146	yeiT	0.81187	0.243478	0.57553	0.00859495	0.408221	0.000382564	5
b2147	yeiA	0.984566	0.851812	0.25956	2.27969e-08	0.194275	3.73e-09	5
b2148	mglC	1.15758	0.534702	0.0539959	2.44565e-07	0.0400738	1.01e-07	1
b2149	mglA	1.12688	0.738679	0.0851506	4.2865e-05	0.0569133	1.22e-05	1
b2150	mglB	1.4451	0.334142	0.0633201	2.33889e-05	0.0456982	9.13e-06	1
b2151	galS	1.00081	0.997258	0.193854	3.98288e-05	0.0924808	1.66e-06	2
b2152	yeiB	1.01989	0.95342	0.311642	0.00567009	0.0130143	1.89e-07	1
[truncated: 2,246 more rows]
